# Supplementary material for: Predicting retrosynthetic pathways using transformer-based models and a hyper-graph exploration strategy
Source: PubMed Central journal article supplement — Chem Sci. 2020 Mar 3;11(12):3316–25. doi: 10.1039/c9sc05704h (PMC8152799; doi:10.1039/c9sc05704h), 2020-03-03

# Supporting Information: Predicting Retrosynthetic Pathways using Transformer-based Models and a Hyper-Graph Exploration Strategy

Philippe Schwaller,<sup>\*,†</sup> Riccardo Petraglia,<sup>†</sup> Valerio Zullo,<sup>‡</sup> Vishnu H Nair,<sup>†</sup> Rico  
Andreas Haeuselmann,<sup>†</sup> Riccardo Pisoni,<sup>†</sup> Costas Bekas,<sup>†</sup> Anna Iuliano,<sup>‡</sup> and  
Teodoro Laino<sup>†</sup>

<sup>†</sup>*IBM Research GmbH, Zurich, Switzerland*

<sup>‡</sup>*Department of Chemistry and Industrial Chemistry, University of Pisa, Pisa, Italy*

E-mail: phs@zurich.ibm.com

## 1 Hypergraph exploration

Algorithm 1 provides an overview of the hyper-graph expansion strategy, where given a starting node ( $N$ ), the graph is expanded by predicting the reactions and precursors ( $R_i$ ) leading to the molecule  $N$ . The single-step retrosynthetic model uses a beam-search to explore the possible disconnections and we retain the top-15 predicted sets of precursors (thus,  $i = \{1, 2, \dots, 15\}$ ). The SMILES corresponding to these predictions are canonicalized and duplicate entries removed. Any SMILES that fails in the canonicalization step or contains the target molecule is also removed. The remaining sets of precursors are further filtered by using the forward model to assess reaction viability and selectivity. Regarding viability, we

retain only those precursors ( $R_i$ ) whose top-1 forward model predictions match the molecule  $N$ . This guarantees that, in the presence of multiple functional groups, the recommended disconnection leads to the desired targets. While this is a necessary condition, it is not a sufficient one as competitive reactions (top-2 and following) may lead to a mixture of molecules different from the desired target. In order to enforce chemo-selectivity, we use the likelihood of the top-1 forward prediction model and select only top-1 predictions with a likelihood larger than the subsequent top-2 by at least 0.2. As the sum of likelihoods for the predictions of different sets of precursors ( $R_i$ ) leading to a target  $N$  is one, any prediction likelihood higher than 0.6 automatically satisfies the requirements above and passes our filter. This filtering protocol increases the occurrence of chemo-selective reactions along the retrosynthetic path, penalizing disconnections that are highly competitive.

---

**Algorithm 1:** Hyper-graph expansion algorithm

---

**Data:** Existing Node  $N$ , Beam Size  $B$ , retrosynthesis model, forward model

**Result:** New Nodes connected to  $N$

**begin**

$R = \{R_i | i = 1..B\} \leftarrow$  Predict possible retrosynthesis steps (top- $B$ ) //  $R_i$  are represented as SMILES

**for**  $R_i \in R$  // select precursor sets for expansion

**do**

$R_i \leftarrow$  Try to canonicalize  $R_i$ , discard if not canonicalizable

Discard  $R_i$ , if  $N$  is a precursor in  $R_i$

$L_{R_i \rightarrow N} \leftarrow$  Compute likelihood of reaction  $R_i \rightarrow N$

**if**  $L_{R_i \rightarrow N} > 0.6$  **then**

| Attach  $R_i$  to  $N$  with a hyper-arc

**else**

$F_{top-1}, F_{top-2} \leftarrow$  Predict top-2 forward reactions from  $R_i$

**if** Product of  $F_{top-1}$  is  $N$  and

$Likelihood(F_{top-1}) > 0.2 + Likelihood(F_{top-2})$  **then**

| Attach  $R_i$  to  $N$  with a hyper-arc

**else**

| discard  $R_i$

Moreover, precursor sets are clustered together to identify similar disconnection strategies

and reduce tree complexity. Within the same cluster, the precursors related to the highest forward prediction likelihood are used as starting nodes for further tree expansion. Every precursor molecule, unless already present in the graph, will generate a new node, and every reaction will connect each of the reactants to the target molecule by means of a new hyper-arc.

Every hyper-arc in the tree is scored with a so-called optimization score, which is used to define the "best" retrosynthetic route. The total score of a retrosynthetic pathway is calculated by multiplying the scores of all the arcs contained in the path. The definition of the score for a single arc is:

$$S(C \Rightarrow A + B) = P(A + B \rightarrow C) \frac{s(A) * s(B)}{s(C)} \quad (1)$$

where  $S(C \Rightarrow A + B)$  denotes the score for a single retrosynthetic step: the higher the score the higher the preference towards that step.  $P(A + B \rightarrow C)$  is the likelihood of the forward chemical reaction computed by the forward prediction model.  $s(X)|X \in \{A, B, C\}$  is the simplicity score of molecule X:

$$s(X) = 1 - \frac{SC(X) - 1}{4} \quad (2)$$

where  $SC(X)$  is the SCScore<sup>1</sup> of molecule X. The SCScore of a molecule increases from 1 to 5 with an increasing complexity of the synthetic route. In this framework, the SCScore constitutes the driving force that pulls a retrosynthetic pathway towards simpler molecules.

Equation 1 closely resembles the definition of the Bayesian probability. In fact, assuming access to the set of all possible reactions, the likelihood of a retrosynthetic step would be defined as the conditional probability of observing the product when given the reactants, weighted by the ratio between the occurrence of the reagents and the occurrence of the product.

Even with a multi-million entry database, the evaluation of the individual components

would still be quite inaccurate. In fact, any molecule unreported in this database will contribute a value of zero to the evaluation of the Bayesian probability, with important drawbacks for the hyper-tree exploration. Therefore, the definition of the score for a single retrosynthetic step was only inspired by the Bayesian probability. We replaced the conditional probability with the likelihood of the forward prediction model and the probability of observing either reactants or products with a simplicity score. Similar to the Bayesian probability, the use of this heuristic favours those reaction that give more simple products (compared to reactants) under the same forward prediction likelihood.

The search for the optimal retrosynthetic route starts with the definition of a target molecule and uses a beam-search approach. The beam-search method is a greedy version of the best-first search: while best-first explores the entire graph and sorts all the possible paths according to some heuristic score, the beam search limits the exploration to a defined number of paths, thus limiting the computational cost without offering any guarantee of identifying the globally optimal path. The beam-search, as implemented in our software, relies on the following steps:

1. Expand the graph at every node contained in one of the possible pathways discovered up to this point and not yet expanded.
2. Create a new pathway for each of the arcs created by the last expansion.
3. Repeat steps 1 and 2 for a given number of times.
4. Assign a score to every pathway and discard the ones with the lowest score until the total number of "un-terminated" pathways correspond to the number of beams imposed by the user.
5. Restart from point 1 until all of the pathways meet one of the terminating conditions.

Each pathway of the beam-search may end because all the molecules needed to start the synthesis are found in a database of commercially available chemicals; or because the

number of synthetic steps (which corresponds to the number of "expansion phases") exceeds the number of maximum steps defined by the user; or finally because there is no possibility to further expand the needed nodes. The last condition may result from none of the set of precursors ( $R_i$ ) surviving the filtering or from all the hyper-arcs generated by the expansion forming a cycle in the tree. From a chemical point of view, this means that one of the precursors of the product requires the product to synthesize itself.

Every time a pathway enters a cycle, the pathway itself is considered terminated. The tree exploration returns all the possible paths leading to a successful retrosynthesis, sorted by the optimization score.

## 2 Molecule representation

Similar to our previous works we use SMILES to represent molecules, taking more advantage of the auxiliary fragment information in which the grouped fragment indices are written after the label 'f:'. The different groups are separated by a ',' and the connected fragments within a group are separated by '.'. An example would be '|f:1.2,4.5|'. , where the fragments 1 and 2 as well as 4 and 5 belong together. There is nothing that enforces closeness of fragments in the SMILES string, hence different fragments belonging to the same compound could end up at opposite ends of the string. Typical examples are metallorganic compounds. Here, we relate the fragments within a group with a '~' character instead of a '.'. Consequently, the fragmented molecules are kept together in the reaction string.

Atom-mapping as well as reactant-reagent roles, are a rich source of information generated by highly complicated tasks,<sup>2</sup> the assignment often being subjectively made by humans. Schwaller et al.<sup>3</sup> recently proposed to ignore reactant and reagent roles for the reaction prediction task. In contrast to previous works,<sup>4-7</sup> the single-step retrosynthetic model presented here predicts reactants and reagents. In an effort to simplify the prediction task, the most common precursors with a length of more than 50 tokens were replaced by molecule tokens.

Those molecules were turned back into the usual tokenization before calculating the likelihood with the forward model. Moreover, to ensure a basic tautomer standardization we inched our molecules, as described in,<sup>8</sup> to improve the quality of the forward prediction model. In contrast to previous work,<sup>9</sup> we never use a reaction class token as input for the retrosynthesis model.

The data sets used to train the different models in this work are derived from the open source USPTO reaction database by Lowe<sup>10,11</sup> and the Pistachio database by NextMove Software.<sup>12</sup> We preprocessed both data sets to filter out incomplete reactions and keep 1M and 2M entries, respectively. As done previously in,<sup>3,13</sup> we added 800k textbook reactions to the training of specific forward and retrosynthetic models.

## 3 Models

### 3.1 Forward reaction prediction model

The forward prediction model was trained with the same hyperparameters as the original Molecular Transformer,<sup>3</sup> apart from the number of the attention layers, which was increased from 256 to 384. Thanks to the increase in capacity, a higher validation accuracy could be reached. For the final model we used a data set derived from Pistachio3.0<sup>12</sup> where all the molecules were inched. As described in the work of Schwaller et al.<sup>3</sup> we augmented the training data with the addition of random SMILES and textbook reactions to the training set.

The forward prediction model can be used in two modes. First, when given a precursor set, the most likely products can be predicted. Second, when given a precursor set and a target product, the likelihood of this specific reaction can be estimated. In this work, we set the beam size of the forward model to 3.

As described previously, we use the forward chemical prediction model as a digital domain expert for evaluating the correctness of the predictions generated by the retrosynthetic model.

As recently published,<sup>3</sup> the accuracy of this model is higher than 90% when compared with a public data set. In order to calibrate the forward prediction model within the entire retrosynthetic framework, 50 random forward reaction predictions were analyzed by human experts. The assessment gave an accuracy of 78% which should be compared to an accuracy of 80% given by the trained model. Although the data set is too limited to claim any statistical relevance, this assessment offers strong evidence in favour of using the forward prediction model as a digital twin of human chemists.

### 3.2 Reaction classification model

To classify reactions, we used a data-driven reaction classification model<sup>14</sup> that was trained similarly to the Molecular Transformer forward and retrosynthetic model. It is characterized by four encoder layers and one decoder layer and trained using the same hyperparameters. The main difference is that the inputs were made up of the complete reaction string (precursors→products) and the outputs of the split reaction class identifier from NameRXN, consisting of three numbers corresponding to superclass, classes/categories and named reaction. More details on reaction classes can be found in.<sup>15</sup> The classification model used in this work matches the same class as the NameRXN tool<sup>16</sup> for 93.8% of the reactions.

### 3.3 Experiments on single-step retrosynthesis models

In Table 1 we show how different metrics develop during the training of the *stereo* retro model. After 100k time steps the round-trip accuracy and the coverage plateau and only a slight improvement of the invalid SMILES percentage can be observed, when training for longer.

Table 2 shows a comparison of models trained on different data sets and evaluated with the beam sizes 5, 10 and 20. The beam size defines how many precursor set suggestions output. The more data is used in the training set the less invalid SMILES the models tend to generate. As expected the coverage increases with larger beam sizes, while the round-trip

Table 1: Development of the round-trip accuracy, coverage and percentage of invalid SMILES during training of the retrosynthesis model, evaluated with a forward model trained on *stereo only*.

| Model            | Beam | Total rxns | Round-trip accuracy | Coverage | Invalid SMILES |
|------------------|------|------------|---------------------|----------|----------------|
| stereo only 10k  | 10   | 100k       | 56.9%               | 87.4%    | 4.03 %         |
| stereo only 20k  | 10   | 100k       | 73.8%               | 93.8%    | 1.72 %         |
| stereo only 50k  | 10   | 100k       | 78.7%               | 95.0%    | 0.81 %         |
| stereo only 100k | 10   | 100k       | 81.6%               | 95.8%    | 0.65 %         |
| stereo only 150k | 10   | 100k       | 81.3%               | 95.8%    | 0.62 %         |
| stereo only 200k | 10   | 100k       | 81.0%               | 95.8%    | 0.59 %         |
| stereo only 250k | 10   | 100k       | 81.5%               | 95.9%    | 0.58 %         |

accuracy and the percentage of invalid SMILES worsen only slightly. *stereo only* means that the model was trained purely on the 1M reactions derived from the open USPTO dataset.<sup>10,11</sup> The *stereo* model was trained on the USPTO dataset and 800K textbook reactions from Nam & Kim.<sup>13</sup> For the *augmented* model we performed a SMILES data augmentation for the source molecules by using non canonical SMILES.<sup>17</sup> The target always consisted of canonical SMILES. In contrast to reaction prediction,<sup>3</sup> the augmentation seemed not to be beneficial in our retrosynthesis model training experiments.

Table 2: Evaluation of retrosynthesis models with different training data, evaluated on the same validation set with different beam sizes.

| Model       | Beam | Total | Round-trip accuracy | Coverage | Invalid SMILES |
|-------------|------|-------|---------------------|----------|----------------|
| stereo only | 5    | 50k   | 82.4%               | 93.5%    | 0.57 %         |
| stereo      | 5    | 50k   | 83.6%               | 94.2%    | 0.52 %         |
| augmented   | 5    | 50k   | 81.8%               | 94.0%    | 0.43 %         |
| stereo only | 10   | 100k  | 81.5%               | 95.9%    | 0.59 %         |
| stereo      | 10   | 100k  | 82.4%               | 96.4%    | 0.49 %         |
| augmented   | 10   | 100k  | 80.7%               | 96.2%    | 0.42 %         |
| stereo only | 20   | 200k  | 79.8%               | 97.1%    | 0.65 %         |
| stereo      | 20   | 200k  | 80.8%               | 97.5%    | 0.87 %         |
| augmented   | 20   | 200k  | 78.9%               | 97.5%    | 0.49 %         |



## 4 Synthesis routes

On the subsequent pages, the synthesis routes discussed in the main text are presented. The routes were predicted by the model (pistachio), which is openly available on the IBM RXN for Chemistry platform.<sup>18</sup> Figure 1 shows a screenshot of the results page for an example retrosynthesis route prediction.

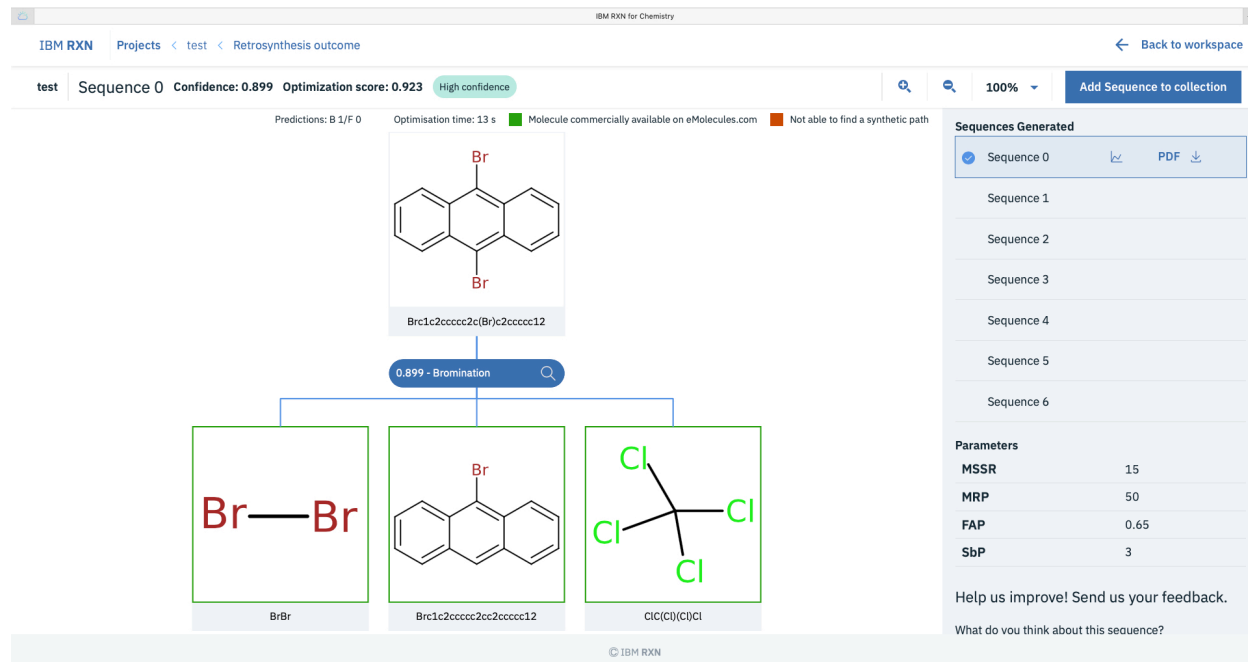

Figure 1: IBM RXN for Chemistry platform, retrosynthesis route prediction results view.

### 4.1 Index of generated retrosynthetic routes

The targets from Coley et al.<sup>19</sup> are extracted from: <http://ibm.biz/Coley-Test>, where corresponding retrosynthesis are also made available.

Both Segler Test-1 and Test-2 are instead from the supporting information:<sup>20</sup> <http://ibm.biz/Segler-Test1-2>, with fully reported synthesis.

Here we list of the corresponding list of retrosynthetic routes generated by IBM RXN for Chemistry :

- S001-S006 : Molecule 1 (academic example)

- S007-S012 : Molecule 2 (academic example)
- S013-S014 : Molecule 3 (academic example)
- S015-S018 : Molecule 4 (academic example)
- S019-S027 : Molecule 5 (academic example)
- S028-S036 : Molecule 6 (academic example)
- S037-S046 : Molecule 7 (academic example)
- S047-S050 : Molecule 8 (academic example)
- S051-S059 : Molecule 9 (academic example)
- S060-S061 : Aspirin (Coley set)
- S062-S066 : Celecoxib (Coley set)
- S067-S073 : Diazepam (Coley set)
- S074-S077 : Lidocain (Coley set)
- S078-S079 : Quinapril (Coley set)
- S080-S084 : Sildenafil (Coley set)
- S085-S086 : Secnidazole (Coley set)
- S087-S090 : (S)-warfarin (Coley set)
- S091-S092 : Molecule 1 - Test 1 (Segler set Test 1)
- S093-S095 : Molecule 2 - Test 1 (Segler set Test 1)
- S096-S098 : Molecule 3 - Test 1 (Segler set Test 1)
- S099-S112 : Molecule 4 - Test 1 (Segler set Test 1)

- S113-S128 : Molecule 5 - Test 1 (Segler set Test 1)
- S129-S134 : Molecule 6 - Test 1 (Segler set Test 1)
- S135-S142 : Molecule 7 - Test 1 (Segler set Test 1)
- S143-S148 : Molecule 8 - Test 1 (Segler set Test 1)
- S149-S151 : Molecule 9 - Test 1 (Segler set Test 1)
- S152-S153 : Molecule 1 - Test 2 (Segler set Test 2)
- S154-S156 : Molecule 2 - Test 2 (Segler set Test 2)
- S157-S160 : Molecule 3 - Test 2 (Segler set Test 2)
- S161-S162 : Molecule 4 - Test 2 (Segler set Test 2)
- S163-S169 : Molecule 5 - Test 2 (Segler set Test 2)
- S170-S171 : Molecule 6 - Test 2 (Segler set Test 2)
- S172-S184 : Molecule 7 - Test 2 (Segler set Test 2)
- S185-S187 : Molecule 8 - Test 2 (Segler set Test 2)
- S188-S190 : Molecule 9 - Test 2 (Segler set Test 2)
- S191-S193 : Molecule 10 - Test 2 (Segler set Test 2)

The last pages of the supporting information show three examples of failing retrosyntheses proposed by the stereo retrosynthesis model:

- S194-S195 : Example 1
- S196-S199 : Example 2
- S200-S201: Example 3

## References

- (1) Coley, C. W.; Rogers, L.; Green, W. H.; Jensen, K. F. SCScore: Synthetic complexity learned from a reaction corpus. *Journal of chemical information and modeling* **2018**, *58*, 252–261.
- (2) Schneider, N.; Stiefl, N.; Landrum, G. A. What’s what: The (nearly) definitive guide to reaction role assignment. *Journal of chemical information and modeling* **2016**, *56*, 2336–2346.
- (3) Schwaller, P.; Laino, T.; Gaudin, T.; Bolgar, P.; Hunter, C. A.; Bekas, C.; Lee, A. A. Molecular Transformer: A Model for Uncertainty-Calibrated Chemical Reaction Prediction. *ACS Central Science* **0**, *0*, null.
- (4) Zheng, S.; Rao, J.; Zhang, Z.; Xu, J.; Yang, Y. Predicting Retrosynthetic Reaction using Self-Corrected Transformer Neural Networks. *arXiv preprint arXiv:1907.01356* **2019**,
- (5) Karpov, P.; Godin, G.; Tetko, I. A Transformer Model for Retrosynthesis. **2019**,
- (6) Lin, K.; Xu, Y.; Pei, J.; Lai, L. Automatic Retrosynthetic Pathway Planning Using Template-free Models. *arXiv preprint arXiv:1906.02308* **2019**,
- (7) Lee, A. A.; Yang, Q.; Sresht, V.; Bolgar, P.; Hou, X.; Klug-McLeod, J. L.; Butler, C. R. Molecular Transformer unifies reaction prediction and retrosynthesis across pharma chemical space. *Chem. Commun.* **2019**, –.
- (8) O’Boyle, N. M. Towards a Universal SMILES representation-A standard method to generate canonical SMILES based on the InChI. *Journal of cheminformatics* **2012**, *4*, 22.
- (9) Liu, B.; Ramsundar, B.; Kawthekar, P.; Shi, J.; Gomes, J.; Luu Nguyen, Q.; Ho, S.;

- Sloane, J.; Wender, P.; Pande, V. Retrosynthetic reaction prediction using neural sequence-to-sequence models. *ACS central science* **2017**, *3*, 1103–1113.
- (10) Lowe, D. M. Extraction of Chemical Structures and Reactions from the Literature. Ph.D. thesis, University of Cambridge, 2012.
- (11) Lowe, D. Chemical reactions from US patents (1976-Sep2016). **2017**,
- (12) Nextmove Software Pistachio. <http://www.nextmovesoftware.com/pistachio.html>, (Accessed Jul 29, 2019).
- (13) Nam, J.; Kim, J. Linking the neural machine translation and the prediction of organic chemistry reactions. *arXiv preprint arXiv:1612.09529* **2016**,
- (14) Schwaller, P.; Vaucher, A.; Nair, V. H.; Laino, T. Data-Driven Chemical Reaction Classification with Attention-Based Neural Networks. **2019**,
- (15) Schneider, N.; Lowe, D. M.; Sayle, R. A.; Tarselli, M. A.; Landrum, G. A. Big data from pharmaceutical patents: a computational analysis of medicinal chemists' bread and butter. *Journal of medicinal chemistry* **2016**, *59*, 4385–4402.
- (16) Nextmove Software NameRXN. <http://www.nextmovesoftware.com/namerxn.html>, (Accessed Jul 29, 2019).
- (17) Bjerrum, E. J. Smiles enumeration as data augmentation for neural network modeling of molecules. *arXiv preprint arXiv:1703.07076* **2017**,
- (18) IBM RXN for Chemistry. <https://rxn.res.ibm.com>, (Accessed Oct 10, 2019).
- (19) others,, et al. A robotic platform for flow synthesis of organic compounds informed by AI planning. *Science* **2019**, *365*, eaax1566.
- (20) Segler, M. H. S.; Preuss, M.; Waller, M. P. Planning chemical syntheses with deep neural networks and symbolic AI. *Nature* **2018**, *555*, 604–610.

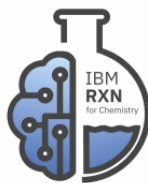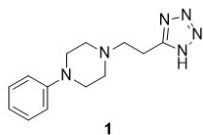

## Information about the retrosynthesis

Created On: 2019-09-27T10:22:21.359000

Model: MolecularTransformer\_v2.0\_R-Inchi-MolecularTransformer\_v2.0\_F

Product: C1C=CC(N2CCN(CCC3=NN=NN3)CC2)=CC=1

MSSR: 10

FAP: 0.7

MRP: 20

SbP: 2

Available smiles:

Exclude smiles: C1C=CC(N2CCN(CCC3=NN=NN3)CC2)=CC=1

Exclude substructures:

## Sequence 0, Confidence: 0.985

### Step 1

Type: Tetrazole synthesis, Confidence: 0.991

N#CCCN1CCN(c2ccccc2)CC1.C[Si](C)(C)N=[N+]=[N-]>>c1ccc(N2CCN(CCc3nnn[nH]3)CC2)cc1

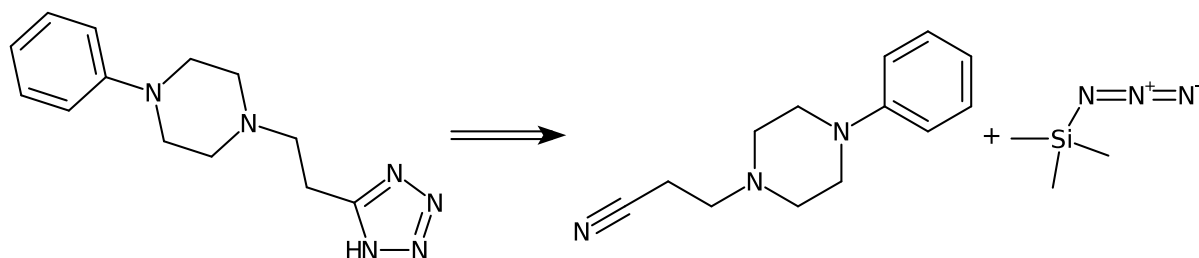

### Step 2

Type: Unrecognized, Confidence: 0.994

C=CC#N.Cc1ccccc1.c1ccc(N2CCNCC2)cc1>>N#CCCN1CCN(c2ccccc2)CC1

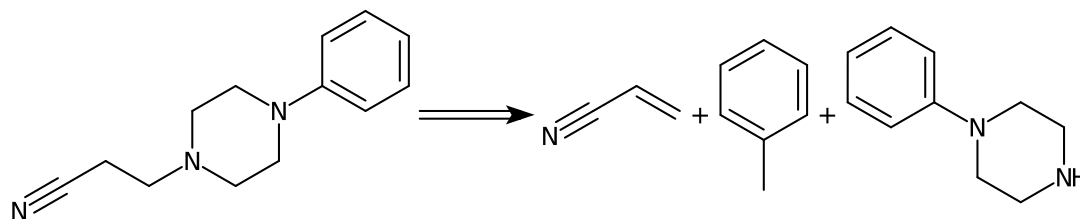

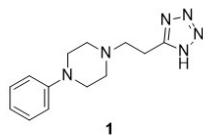

## Information about the retrosynthesis

Created On: 2019-09-27T10:22:21.359000

Model: MolecularTransformer\_v2.0\_R-Inchi-MolecularTransformer\_v2.0\_F

Product: C1C=CC(N2CCN(CCC3=NN=NN3)CC2)=CC=1

MSSR: 10

FAP: 0.7

MRP: 20

SbP: 2

Available smiles:

Exclude smiles: C1C=CC(N2CCN(CCC3=NN=NN3)CC2)=CC=1

Exclude substructures:



## Sequence 17, Confidence: 0.916

### Step 1

Type: Tetrazole synthesis, Confidence: 0.991

N#CCCN1CCN(c2ccccc2)CC1.C[Si](C)(C)N=[N+]=[N-]>>c1ccc(N2CCN(CCc3nnn[nH]3)CC2)cc1



### Step 2

Type: Chloro N-alkylation, Confidence: 0.939

N#CCCCI.c1ccc(N2CCNCC2)cc1>>N#CCCN1CCN(c2ccccc2)CC1

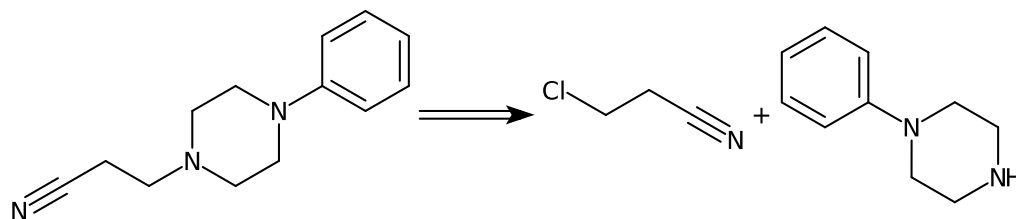

### Step 3

Type: Hydroxy to chloro, Confidence: 0.984

N#CCCCO.O=S(Cl)Cl.c1ccncc1>>N#CCCCI

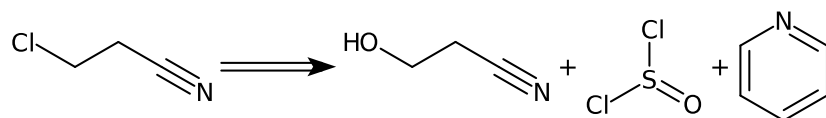

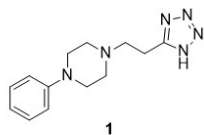

## Information about the retrosynthesis

Created On: 2019-09-27T10:22:21.359000

Model: MolecularTransformer\_v2.0\_R-Inchi-MolecularTransformer\_v2.0\_F

Product: C1C=CC(N2CCN(CCC3=NN=NN3)CC2)=CC=1

MSSR: 10

FAP: 0.7

MRP: 20

SbP: 2

Available smiles:

Exclude smiles: C1C=CC(N2CCN(CCC3=NN=NN3)CC2)=CC=1

Exclude substructures:

## Sequence 22, Confidence: 0.868

### Step 1

Type: Tetrazole synthesis, Confidence: 0.991

N#CCCN1CCN(c2ccccc2)CC1.C[Si](C)(C)N=[N+]=[N-]>>c1ccc(N2CCN(CCc3nnn[nH]3)CC2)cc1



### Step 2

Type: Chloro N-alkylation, Confidence: 0.939

N#CCCCI.c1ccc(N2CCNCC2)cc1>>N#CCCN1CCN(c2ccccc2)CC1



### Step 3

Type: Carbamoyl to cyano, Confidence: 0.933

NC(=O)CCCI.O=P(Cl)(Cl)Cl>>N#CCCCI

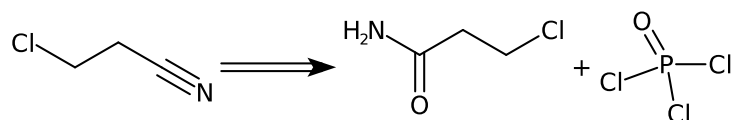

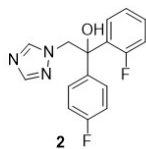

## Information about the retrosynthesis

Created On: 2019-09-27T09:50:56.131000

Model: MolecularTransformer\_v2.0\_R-Inchi-MolecularTransformer\_v2.0\_F

Product: OC(C1C(F)=CC=CC=1)(C1C=CC(F)=CC=1)CN1N=CN=C1

MSSR: 10

FAP: 0.7

MRP: 20

SbP: 2

Available smiles:

Exclude smiles: OC(C1C(F)=CC=CC=1)(C1C=CC(F)=CC=1)CN1N=CN=C1

Exclude substructures:

## Sequence 0, Confidence: 0.88

### Step 1

Type: Bromo Grignard reaction, Confidence: 0.965

O=C(Cn1cncn1)c1ccccc1F.C1CCOC1.Fc1ccc([Mg]Br)cc1>>OC(Cn1cncn1)(c1ccc(F)cc1)c1ccccc1F

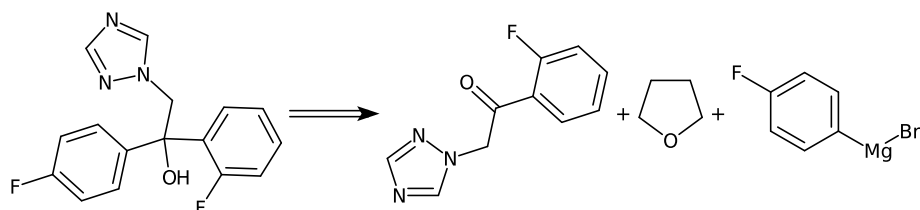

### Step 2

Type: Bromo N-alkylation, Confidence: 0.912

CC#N.O=C(CBr)c1ccccc1F.O=C([O-])[O-].[Cs+].[Cs+].c1nc[nH]n1.O=C([O-])[O-].[Cs+].[Cs+]>>O=C(Cn1cncn1)c1ccccc1F

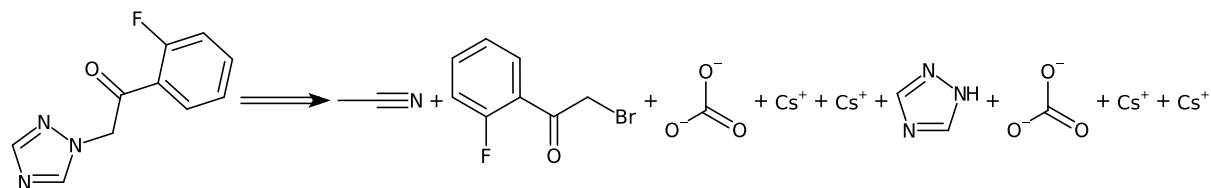



## Information about the retrosynthesis

Created On: 2019-09-27T09:50:56.131000

Model: MolecularTransformer\_v2.0\_R-Inchi-MolecularTransformer\_v2.0\_F

Product: OC(C1C(F)=CC=CC=1)(C1C=CC(F)=CC=1)CN1N=CN=C1

MSSR: 10

FAP: 0.7

MRP: 20

SbP: 2

Available smiles:

Exclude smiles: OC(C1C(F)=CC=CC=1)(C1C=CC(F)=CC=1)CN1N=CN=C1

Exclude substructures:

## Sequence 5, Confidence: 0.845

### Step 1

Type: Epoxide + amine coupling, Confidence: 0.95

Fc1ccc(C2(c3ccccc3F)CO2)cc1.c1nc[nH]n1>>OC(Cn1cncn1)(c1ccc(F)cc1)c1ccccc1F

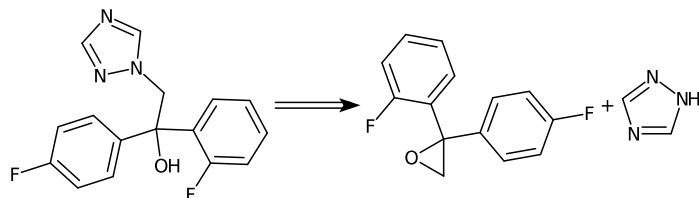

### Step 2

Type: Johnson-Corey-Chaykovsky epoxidation, Confidence: 0.889

CS(C)=O.C[S+](C)(C)=O.[I-].O.O=C(c1ccc(F)cc1)c1ccccc1F.[H-].[Na+].C[S+](C)(C)=O.[I-].[H-].[Na+]>>Fc1ccc(C2(c3ccccc3F)CO2)cc1

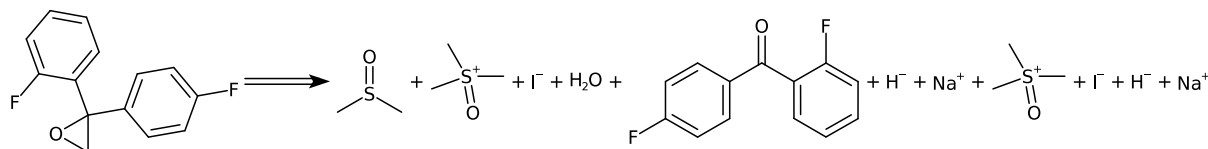

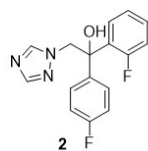

## Information about the retrosynthesis

Created On: 2019-09-27T09:50:56.131000

Model: MolecularTransformer\_v2.0\_R-Inchi-MolecularTransformer\_v2.0\_F

Product: OC(C1C(F)=CC=CC=1)(C1C=CC(F)=CC=1)CN1N=CN=C1

MSSR: 10

FAP: 0.7

MRP: 20

SbP: 2

Available smiles:

Exclude smiles: OC(C1C(F)=CC=CC=1)(C1C=CC(F)=CC=1)CN1N=CN=C1

Exclude substructures:



## Sequence 23, Confidence: 0.759

### Step 1

Type: Epoxide + amine coupling, Confidence: 0.95

Fc1ccc(C2(c3ccccc3F)CO2)cc1.c1nc[nH]n1>>OC(Cn1cncn1)(c1ccc(F)cc1)c1ccccc1F

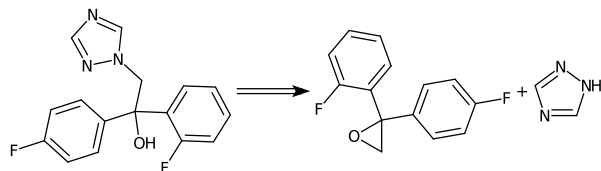

### Step 2

Type: Prilezhaev epoxidation, Confidence: 0.815

C=C(c1ccc(F)cc1)c1ccccc1F.ClCCl.O=C(O)c1ccc(Cl)cc1>>Fc1ccc(C2(c3ccccc3F)CO2)cc1

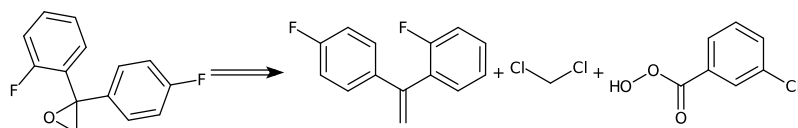

### Step 3

Type: Wittig olefination, Confidence: 0.98

C1CCOC1.C[P+](c1ccccc1)(c1ccccc1)c1ccccc1.[Br-].O=C(c1ccc(F)cc1)c1ccccc1F.[Li]CCCC.C[P+](c1ccccc1)(c1ccccc1)c1ccccc1.[Br-]>>C=C(c1ccc(F)cc1)c1ccccc1F

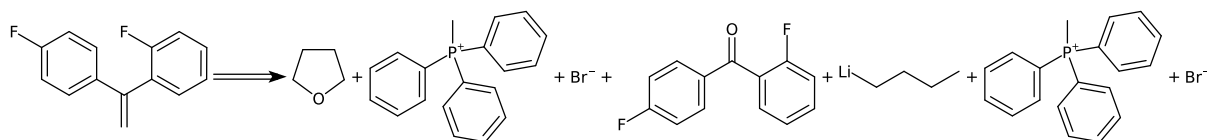

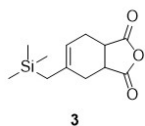

## Information about the retrosynthesis

Created On: 2019-09-27T15:37:32.099000

Model: MolecularTransformer\_v2.0\_R-Inchi-MolecularTransformer\_v2.0\_F

Product: C1C(C[Si](C)(C)C)=CCC2C(=O)OC(=O)C12

MSSR: 10

FAP: 0.7

MRP: 20

SbP: 2

Available smiles:

Exclude smiles: C1C(C[Si](C)(C)C)=CCC2C(=O)OC(=O)C12

Exclude substructures:

## Sequence 0, Confidence: 0.214

### Step 1

Type: Diels-Alder cycloaddition, Confidence: 0.362

C=CC(=C)C[Si](C)(C)C.O=C1C=CC(=O)O1>>C[Si](C)(C)CC1=CCC2C(=O)OC(=O)C2C1

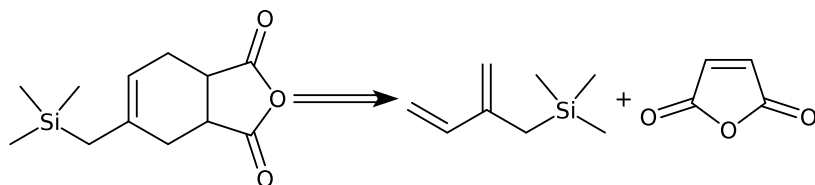

### Step 2

Type: Wittig olefination, Confidence: 0.719

C=CC(=O)C[Si](C)(C)C.C1CCOC1.C[P+](c1ccccc1)(c1ccccc1)c1ccccc1.[Br-].[Li]CCCC>>C=C  
C(=C)C[Si](C)(C)C

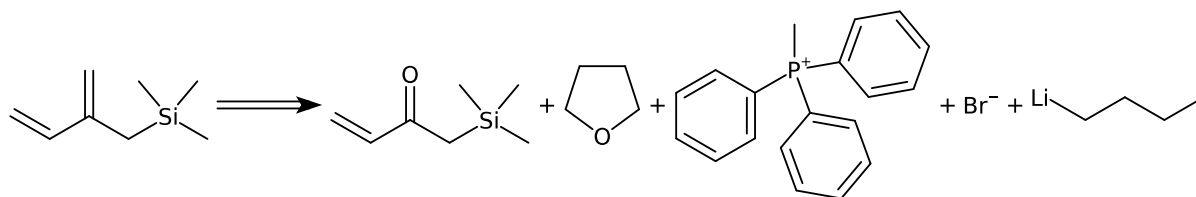

### Step 3

Type: Weinreb ketone synthesis, Confidence: 0.857

CON(C)C(=O)C[Si](C)(C)C.C=C[Mg]Br.CCOCC>>C=CC(=O)C[Si](C)(C)C

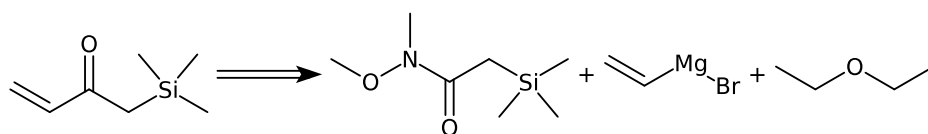

### Step 4

Type: Weinreb amide synthesis, Confidence: 0.96

CNOC.Cl.C[Si](C)(C)CC(=O)O.CNOC.Cl>>CON(C)C(=O)C[Si](C)(C)C

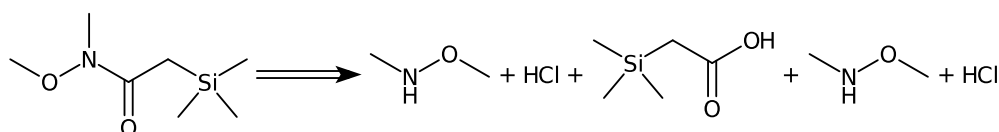

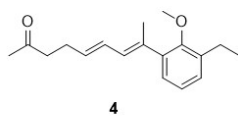

## Information about the retrosynthesis

Created On: 2019-09-27T09:41:56.899000

Model: MolecularTransformer\_v2.0\_R-Inchi-MolecularTransformer\_v2.0\_F

Product: CC(=O)CC/C=C/C=C(/C1=CC=CC(CC)=C1OC)C

MSSR: 10

FAP: 0.7

MRP: 20

SbP: 2

Available smiles:

Exclude smiles: CC(=O)CC/C=C/C=C(/C1=CC=CC(CC)=C1OC)C

Exclude substructures:

## Sequence 0, Confidence: 0.398

### Step 1

Type: Ketone dioxolane deprotection, Confidence: 0.963

CCc1cccc(/C(C)=C/C=C/C/CCC2(C)OCCO2)c1OC.CC(C)=O.Cl.O>>CCc1cccc(/C(C)=C/C=C/C/CCC(C)=O)c1OC

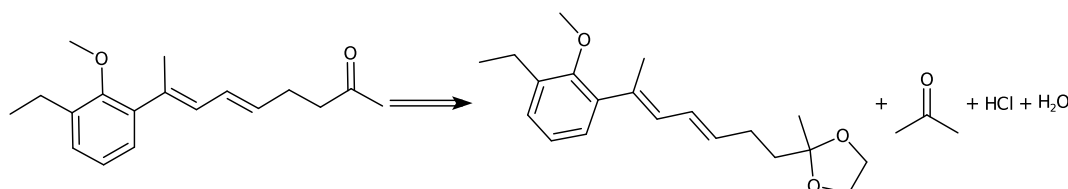

### Step 2

Type: Horner-Wadsworth-Emmons reaction, Confidence: 0.915

CC1(CCC=O)OCCO1.CCc1cccc(/C(C)=C/CP(=O)(OC)OC)c1OC.C1CCOC1.[H-].[Na+]>>CCc1cccc(/C(C)=C/C=C/C/CCC2(C)OCCO2)c1OC

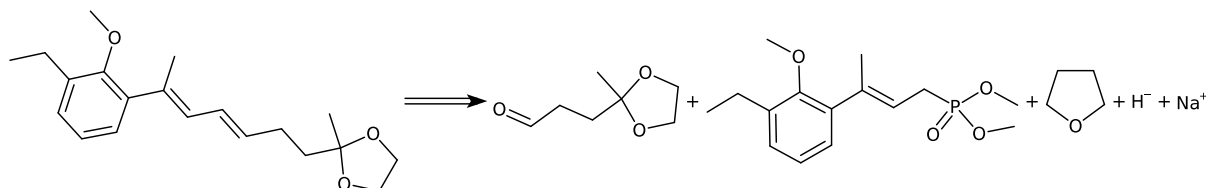

### Step 3

Type: Aldehyde Collins oxidation, Confidence: 0.983

CC1(CCCO)OCCO1.ClCCl.O=[Cr](=O)([O-])Cl.c1cc[nH+]cc1.O=[Cr](=O)([O-])Cl.c1cc[nH+]cc1>>CC1(CCC=O)OCCO1

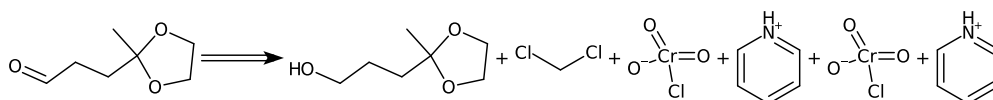

Type: Michaelis-Arbuzov reaction, Confidence: 0.944

CCc1cccc(/C(C)=C/CCl)c1OC.C1CCOC1.COP(OC)OC>>CCc1cccc(/C(C)=C/CP(=O)(OC)OC)c1OC

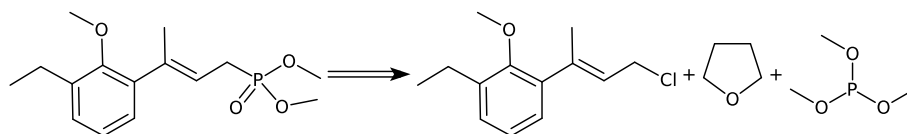

### Step 4

Type: Hydroxy to chloro, Confidence: 0.971

CCc1cccc(/C(C)=C/CO)c1OC.ClCCl.O=S(Cl)Cl.c1ccncc1>>CCc1cccc(/C(C)=C/CCl)c1OC

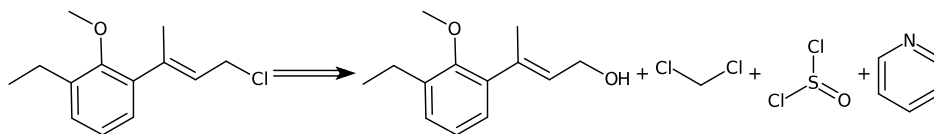

### Step 5

Type: Aldehyde to alcohol reduction, Confidence: 0.94

CCc1cccc(/C(C)=C/C=O)c1OC.CO.[BH4-].[Na+]>>CCc1cccc(/C(C)=C/CO)c1OC

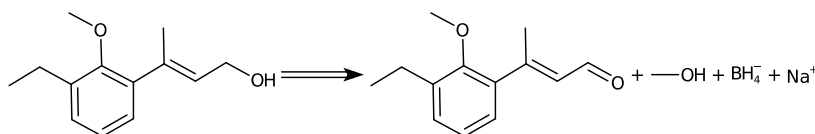

### Step 6

Type: Cyano to formyl, Confidence: 0.92

CCc1cccc(/C(C)=C/C#N)c1OC.CC(C)C[AlH]CC(C)C>>CCc1cccc(/C(C)=C/C=O)c1OC

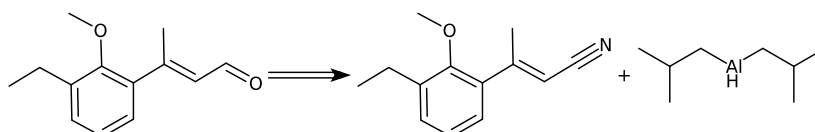

### Step 7

Type: Horner-Wadsworth-Emmons reaction, Confidence: 0.625

CCc1cccc(C(C)=O)c1OC.COP(=O)(CC#N)OC>>CCc1cccc(/C(C)=C/C#N)c1OC

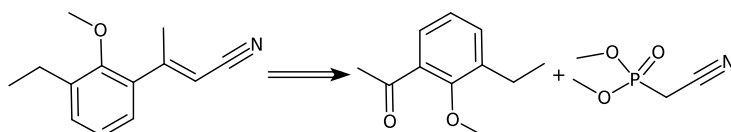

### Step 8

Type: Alcohol to ketone oxidation, Confidence: 0.964

CCc1cccc(C(C)O)c1OC.ClCCl.O=[Mn]=O>>CCc1cccc(C(C)=O)c1OC

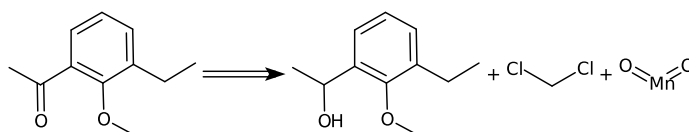

### Step 9

Type: Bromo Grignard reaction, Confidence: 0.99

CCc1cccc(C=O)c1OC.C[Mg+].[Br-]>>CCc1cccc(C(C)O)c1OC

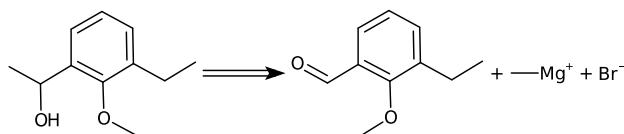

### Step 10

Type: Hydroxy to methoxy, Confidence: 0.972

C1CCOC1.CCc1cccc(C=O)c1O.Cl.[H-].[Na+].[H-].[Na+]>>CCc1cccc(C=O)c1OC

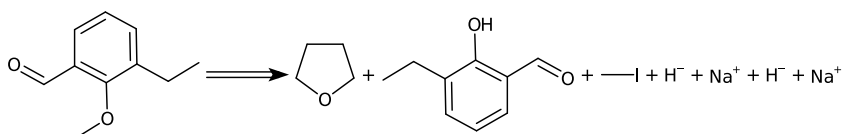

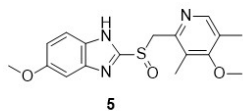

## Information about the retrosynthesis

Created On: 2019-10-01T14:57:31.373000

Model: MolecularTransformer\_v2.0\_R-Inchi-MolecularTransformer\_v2.0\_F

Product: C(CS(=O)C1NC2=CC=C(OC)C=C2N=1)1=C(C)C(OC)=C(C)C=N1

MSSR: 15

FAP: 0.7

MRP: 20

SbP: 2

Available smiles:

Exclude smiles: C(CS(=O)C1NC2=CC=C(OC)C=C2N=1)1=C(C)C(OC)=C(C)C=N1

Exclude substructures:



## Sequence 0, Confidence: 0.949

### Step 1

Type: Sulfanyl to sulfinyl, Confidence: 0.949

CC(=O)O.COc1ccc2[nH]c(SCc3ncc(C)c(OC)c3C)nc2c1.OO>>COc1ccc2[nH]c(S(=O)Cc3ncc(C)c(OC)c3C)nc2c1

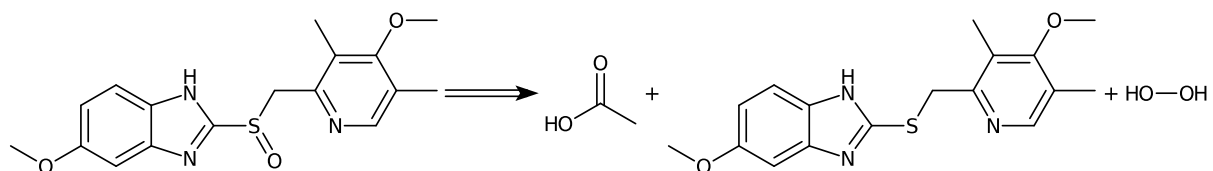

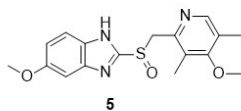

## Information about the retrosynthesis

Created On: 2019-10-01T15:01:50.922000

Model: MolecularTransformer\_v2.0\_R-Inchi-MolecularTransformer\_v2.0\_F

Product: C(CS(=O)C1NC2=CC=C(OC)C=C2N=1)1=C(C)C(OC)=C(C)C=N1

MSSR: 15

FAP: 0.7

MRP: 20

SbP: 2

Available smiles: C1=CC=CC=C1

Exclude smiles: C(CS(=O)C1NC2=CC=C(OC)C=C2N=1)1=C(C)C(OC)=C(C)C=N1

Exclude substructures:

## Sequence 0, Confidence: 0.579

Metadata:

Warnings: The retrosynthesis did not complete. Try increasing MSSR.

### Step 1

Type: Sulfanyl to sulfinyl, Confidence: 0.943

COc1ccc2nc(SCc3ncc(C)c(OC)c3C)[nH]c2c1.ClCCl.O=C(O)c1cccc(Cl)c1>>COc1ccc2[nH]c(S(=O)Cc3ncc(C)c(OC)c3C)[nH]c2c1

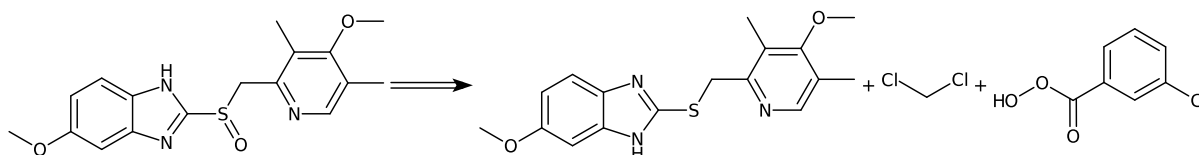

### Step 2

Type: Thioether synthesis, Confidence: 0.947

COc1c(C)cnc(CBr)c1C.COc1ccc2nc(S)[nH]c2c1.CN(C)C=O.O=C([O-])[O-].[K+].[K+]>>COc1cc2nc(SCc3ncc(C)c(OC)c3C)[nH]c2c1

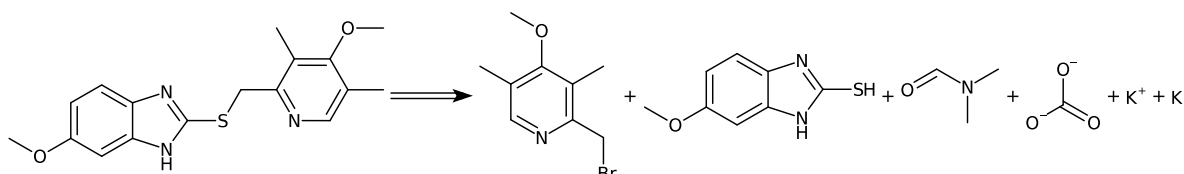

### Step 3

Type: Appel bromination, Confidence: 0.981

COc1c(C)cnc(CO)c1C.BrC(Br)(Br)Br.ClCCl.c1ccc(P(c2ccccc2)c2ccccc2)cc1>>COc1c(C)cnc(CBr)c1C

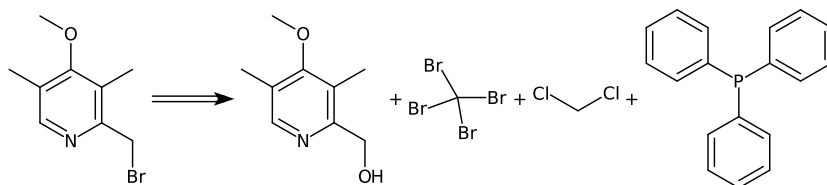

Type: Unrecognized, Confidence: 0.968

COc1ccc(N)c(N)c1.Cl.CCO.CCOC(=S)[S-].[K+].COc1ccc(N)c(N)c1.Cl>>COc1ccc2nc(S)[nH]c2c1

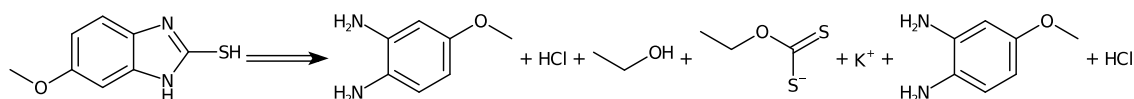

#### Step 4

Type: Ester to alcohol reduction, Confidence: 0.988

CCOC(=O)c1ncc(C)c(OC)c1C.C1CCOC1.[BH4-].[Li+]>>COc1c(C)cnc(CO)c1C

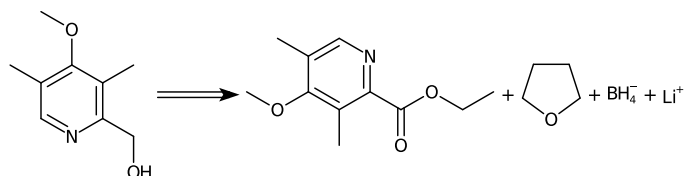

Type: Undefined, Confidence: 0.0

COc1ccc(N)c(N)c1.Cl>>COc1ccc(N)c(N)c1.Cl

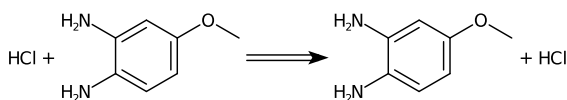

#### Step 5

Type: Fischer-Speier esterification, Confidence: 0.981

COc1c(C)cnc(C(=O)O)c1C.CCO.O=S(=O)(O)O>>CCOC(=O)c1ncc(C)c(OC)c1C

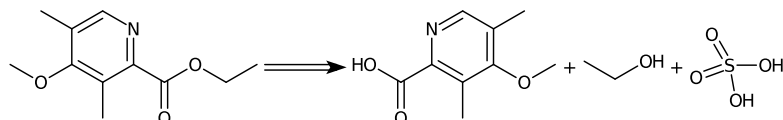

#### Step 6

Type: CO<sub>2</sub>H-Me deprotection, Confidence: 0.976

COC(=O)c1ncc(C)c(OC)c1C.CO.Cl.O.[Na+].[OH-]>>COC(=O)c1ncc(C)c(OC)c1C

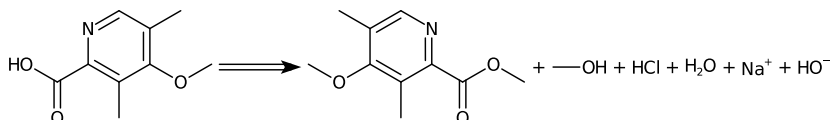

#### Step 7

Type: Pinner reaction, Confidence: 0.959

COc1c(C)cnc(C#N)c1C.CO.O=S(=O)(O)O>>COC(=O)c1ncc(C)c(OC)c1C

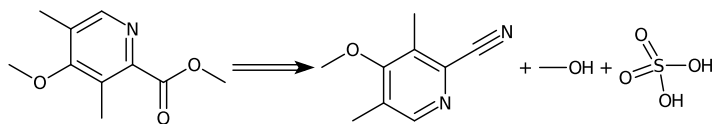

### Step 8

Type: Unrecognized, Confidence: 0.966

COc1c(C)c[n+][[O-]]cc1C.CN(C)C(=O)Cl.C[Si](C)(C)C#N.ClCCl>>COc1c(C)cnc(C#N)c1C

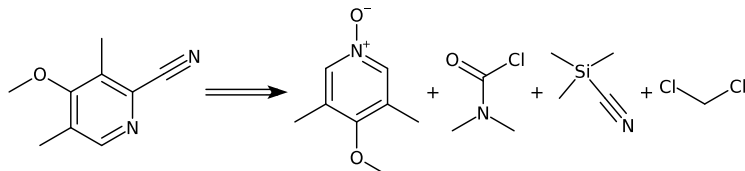

### Step 9

Type: Unrecognized, Confidence: 0.94

Cc1c[n+][[O-]]cc(C)c1[N+](=O)[O-].CO.C[O-].[Na+]>>COc1c(C)c[n+][[O-]]cc1C

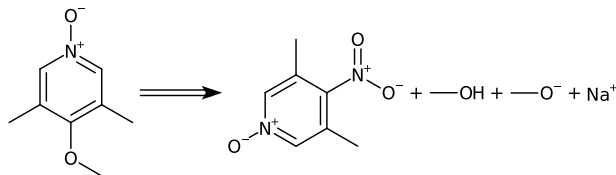

### Step 10

Type: Nitration, Confidence: 0.955

Cc1cc(C)c[n+][[O-]]c1.O=S(=O)(O)O.O=[N+][[O-]]O.[Na+].[OH-]>>Cc1c[n+][[O-]]cc(C)c1[N+](=O)[O-]

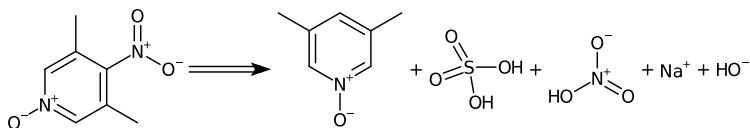

### Step 11

Type: Nitrogen oxidation, Confidence: 0.901

Cc1cncc(C)c1.ClCCl.O=C(O)c1ccc(Cl)c1>>Cc1cc(C)c[n+][[O-]]c1

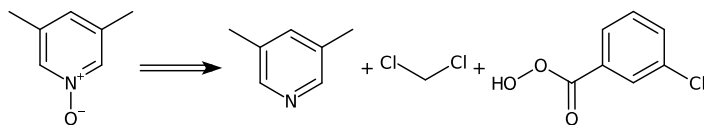

### Step 12

**Type: Aldehyde to alkane reduction, Confidence: 0.985**

**Cc1cncc(C=O)c1.NN.O.OCCOCCO.[K+].[OH-]>>Cc1cncc(C)c1**

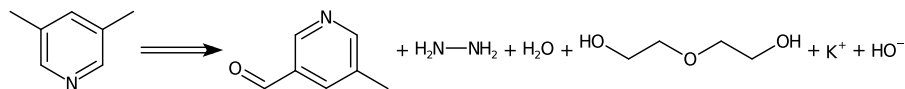

### Step 13

**Type: Alcohol to aldehyde oxidation, Confidence: 0.993**

**Cc1cncc(CO)c1.O=[Mn]=O>>Cc1cncc(C=O)c1**

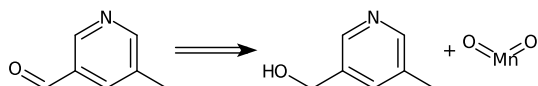

### Step 14

**Type: Ester to alcohol reduction, Confidence: 0.991**

**COC(=O)c1cncc(C)c1.C1CCOC1.[BH4-].[Li+]>>Cc1cncc(CO)c1**

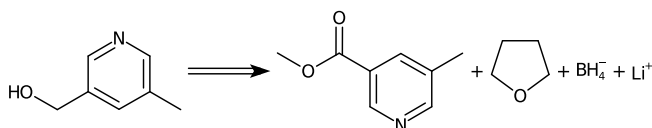

### Step 15

**Type: Fischer-Speier esterification, Confidence: 0.993**

**Cc1cncc(C(=O)O)c1.CO.O=C([O-])O.[Na+].O=S(=O)(O)O>>COC(=O)c1cncc(C)c1**

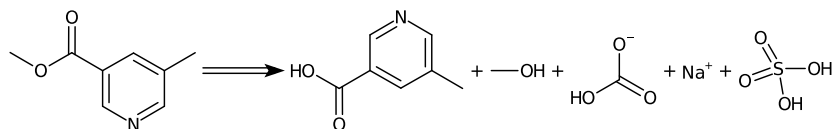

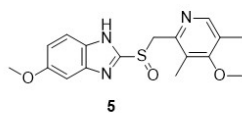

## Information about the retrosynthesis

Created On: 2019-10-01T20:33:01.477000

Model: MolecularTransformer\_v2.0\_R-Inchi-MolecularTransformer\_v2.0\_F

Product: N1=CC(C(=O)O)=CC(C)=C1

MSSR: 15

FAP: 0.7

MRP: 20

SbP: 2

Available smiles: C1=CC=CC=C1

Exclude smiles: N1=CC(C(=O)O)=CC(C)=C1

Exclude substructures:

## Sequence 0, Confidence: 0.743

### Step 1

Type: Bromo to carboxy, Confidence: 0.949

Cc1cncc(Br)c1.C1CCOC1.O=C=O.[Li]CCCC>>Cc1cncc(C(=O)O)c1

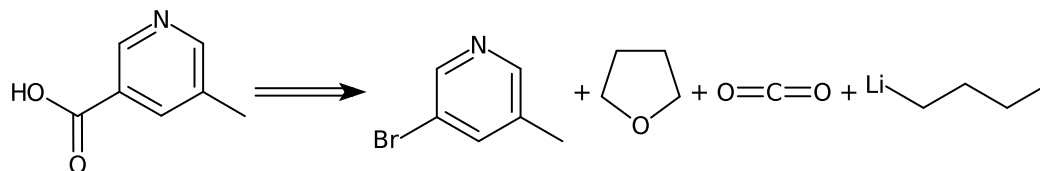

### Step 2

Type: Wurtz-Fittig coupling, Confidence: 0.783

BrC1cncc(Br)c1.C1CCOC1.CCCCCC.Cl.[Li]CCCC>>Cc1cncc(Br)c1

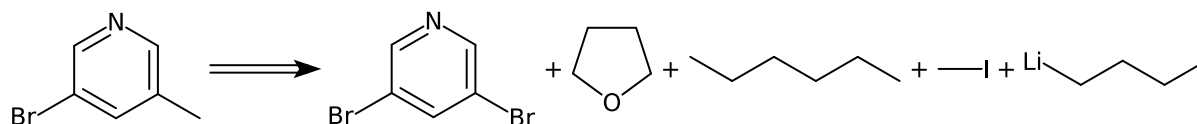



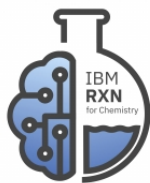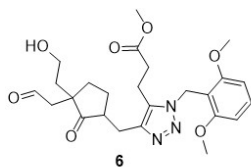

## Information about the retrosynthesis

Created On: 2019-09-27T07:41:29.805000

Model: MolecularTransformer\_v2.0\_R-Inchi-MolecularTransformer\_v2.0\_F

Product: COC(CCC1N(CC2C(OC)=CC=CC=2OC)N=NC=1CC1C(=O)C(CC=O)(CO)CC1)=O

MSSR: 10

FAP: 0.7

MRP: 20

SbP: 2

Available smiles:

Exclude smiles:

COC(CCC1N(CC2C(OC)=CC=CC=2OC)N=NC=1CC1C(=O)C(CC=O)(CO)CC1)=O

Exclude substructures:

## Sequence 0, Confidence: 0.216

Metadata:

Warnings: 'UNFINISHED MESSAGE'

### Step 1

Type: Ozonolysis, Confidence: 0.592

C=CCC1(CO)CCC(Cc2nnn(Cc3c(OC)cccc3OC)c2CCC(=O)OC)C1=O.CO.ClCCl.O=[O+][O-]>>COC(=O)CCc1c(CC2CCC(CO)(CC=O)C2=O)nnn1Cc1c(OC)cccc1OC

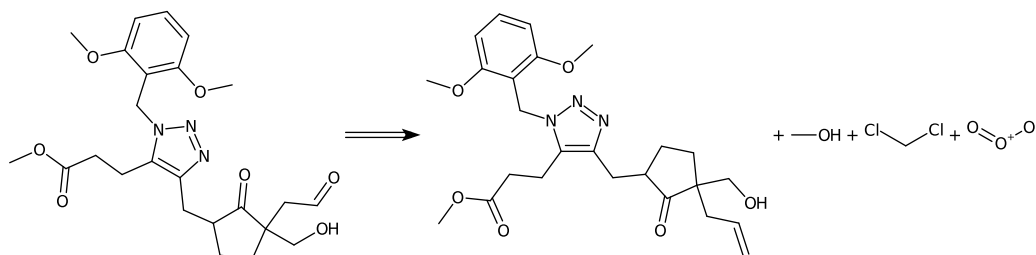

### Step 2

Type: O-TBS deprotection, Confidence: 0.937

C=CCC1(CO[Si](C)(C)C(C)(C)C)CCC(Cc2nnn(Cc3c(OC)cccc3OC)c2CCC(=O)OC)C1=O.CC#N.F>>C=CCC1(CO)CCC(Cc2nnn(Cc3c(OC)cccc3OC)c2CCC(=O)OC)C1=O

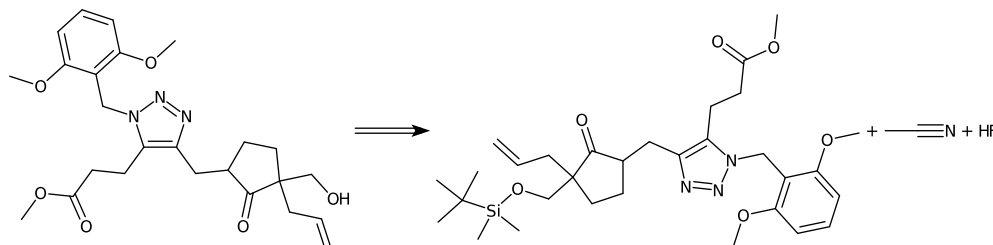

### Step 3

Type: Unrecognized, Confidence: 0.922

C=CCC1(CO[Si](C)(C)C(C)(C)C)CCCC1=O.COC(=O)CCc1c(Cl)nnn1Cc1c(OC)cccc1OC.C1CCO.C1.CC(C)[N-]C(C)C.[Li+]>>C=CCC1(CO[Si](C)(C)C(C)(C)C)CCC(Cc2nnn(Cc3c(OC)cccc3OC)c2CCC(=O)OC)C1=O

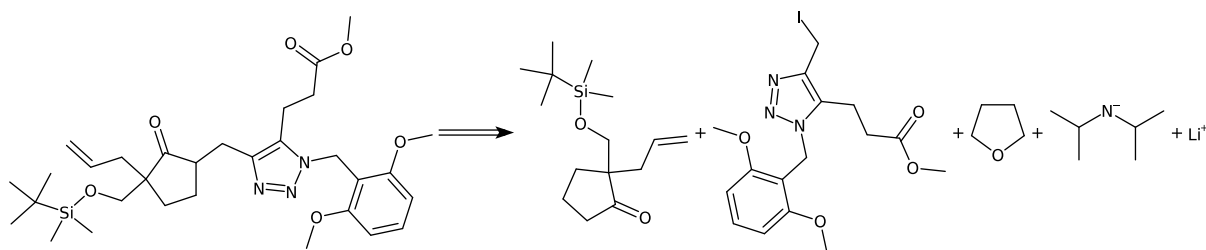

### Step 4

Type: O-TBS protection, Confidence: 0.963

C=CCC1(CO)CCCC1=O.CC(C)(C)[Si](C)(C)Cl.CN(C)c1ccncc1.ClCCl>>C=CCC1(CO[Si](C)(C)C(C)(C)C)CCCC1=O

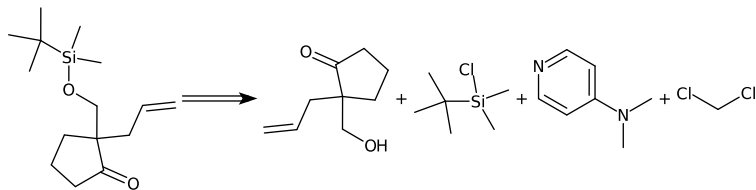

Type: Chloro to iodo Finkelstein reaction, Confidence: 0.955

COC(=O)CCc1c(CCl)nnn1Cc1c(OC)cccc1OC.CC(C)=O.[I-].[Na+]>>COC(=O)CCc1c(Cl)nnn1Cc1c(OC)cccc1OC

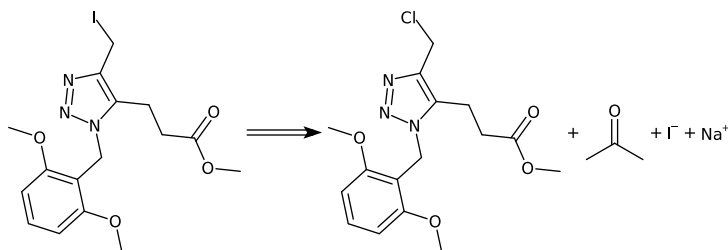

### Step 5

Type: Ketone dioxolane deprotection, Confidence: 0.782

C=CCC12CCCC1(OCC)OC2.C1CCOC1.Cl.O>>C=CCC1(CO)CCCC1=O

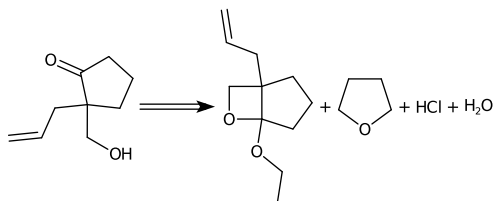

Type: Hydroxy to chloro, Confidence: 0.962

COC(=O)CCc1c(CO)nnn1Cc1c(OC)cccc1OC.ClCCl.O=S(Cl)Cl.c1ccncc1>>COC(=O)CCc1c(CCl)nnn1Cc1c(OC)cccc1OC

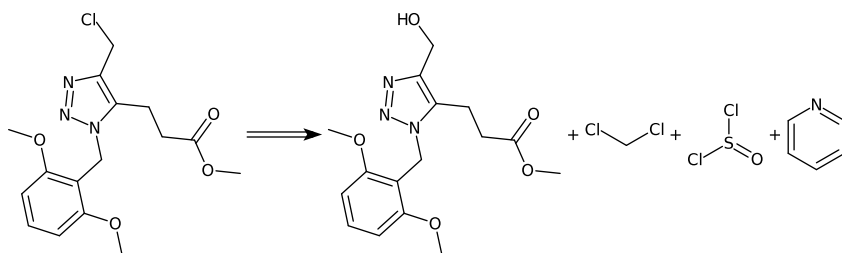

### Step 6

Type: Undefined, Confidence: 0.0

C=CCC12CCCC1(OCC)OC2>>C=CCC12CCCC1(OCC)OC2

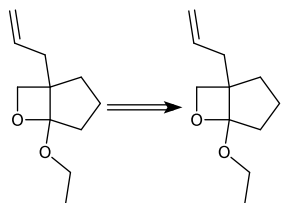

Type: Alkene hydrogenation, Confidence: 0.788

COC(=O)/C=C/c1c(CO)nnn1Cc1c(OC)cccc1OC.[Pd]>>COC(=O)CCc1c(CO)nnn1Cc1c(OC)ccc1OC

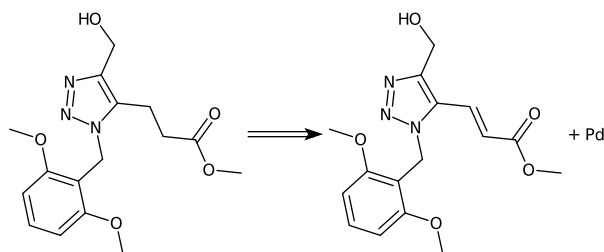

### Step 7

Type: O-TBS deprotection, Confidence: 0.952

COC(=O)/C=C/c1c(CO[Si](C)(C)C(C)(C)C)nnn1Cc1c(OC)cccc1OC.C1CCOC1.CCCC[N+](CCCC)(CCCC)CCCC.[F-]>>COC(=O)/C=C/c1c(CO)nnn1Cc1c(OC)cccc1OC

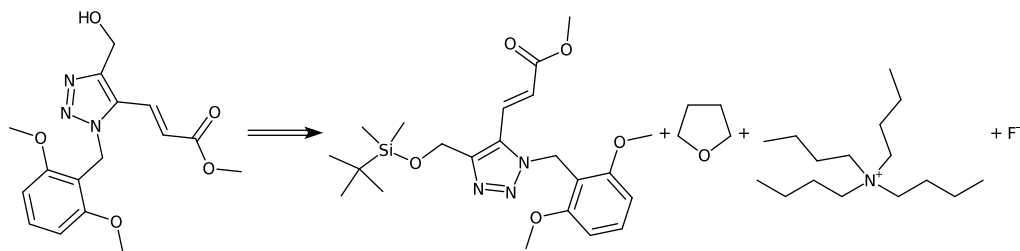

### Step 8

Type: Horner-Wadsworth-Emmons reaction, Confidence: 0.878

COc1cccc(OC)c1Cn1nnc(CO[Si](C)(C)C(C)(C)C)c1C=O.COC(=O)CP(=O)(OC)OC.[NaH]>>COC(=O)/C=C/c1c(CO[Si](C)(C)C(C)(C)C)nnn1Cc1c(OC)cccc1OC

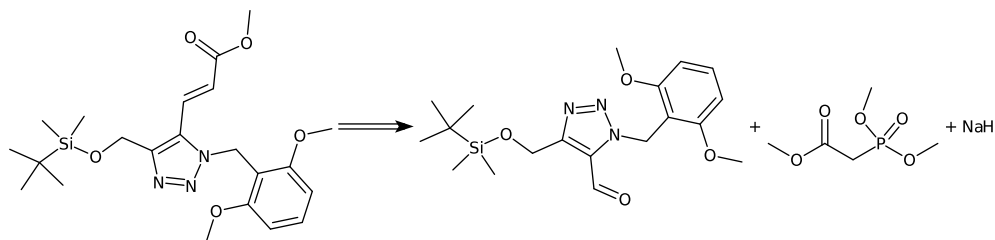

### Step 9

Type: Alcohol to aldehyde oxidation, Confidence: 0.961

COC1CCCC(OC)c1Cn1nnc(CO[Si](C)(C)C(C)C(C)C)c1CO.CICCl.O=[Mn]=O>>COC1CCCC(OC)c1Cn1nnc(CO[Si](C)(C)C(C)C(C)C)c1C=O

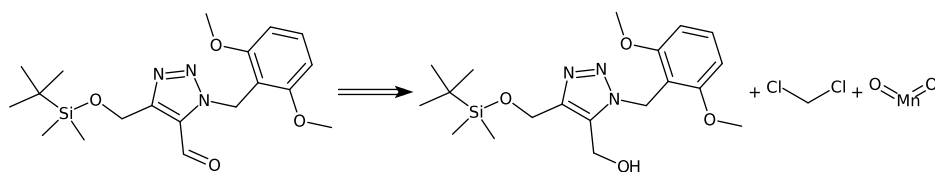

### Step 10

Type: Ester to alcohol reduction, Confidence: 0.963

COC(=O)c1c(CO[Si](C)(C)C(C)C(C)C)nnc1Cc1c(OC)cccc1OC.[BH4-].[Li+]>>COC1CCCC(OC)c1Cn1nnc(CO[Si](C)(C)C(C)C(C)C)c1CO

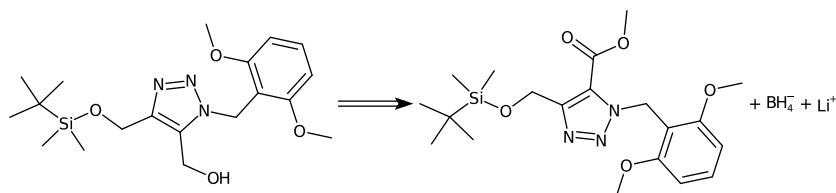

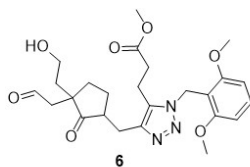

## Information about the retrosynthesis

Created On: 2019-09-28T08:59:25.981000

Model: MolecularTransformer\_v2.0\_R-Inchi-MolecularTransformer\_v2.0\_F

Product: COC(CCC1N(CC2C(OC)=CC=CC=2OC)N=NC=1CC1C(=O)C(CC=O)(CO)CC1)=O

MSSR: 15

FAP: 0.6

MRP: 20

SbP: 3

Available smiles:

Exclude smiles:

COC(CCC1N(CC2C(OC)=CC=CC=2OC)N=NC=1CC1C(=O)C(CC=O)(CO)CC1)=O

Exclude substructures:

## Sequence 0, Confidence: 0.204

### Step 1

Type: Ozonolysis, Confidence: 0.592

C=CCC1(CO)CCC(Cc2nnn(Cc3c(OC)cccc3OC)c2CCC(=O)OC)C1=O.CO.ClCCl.O=[O+][O-]>>COC(=O)CCc1c(CC2CCC(CO)(CC=O)C2=O)nnn1Cc1c(OC)cccc1OC

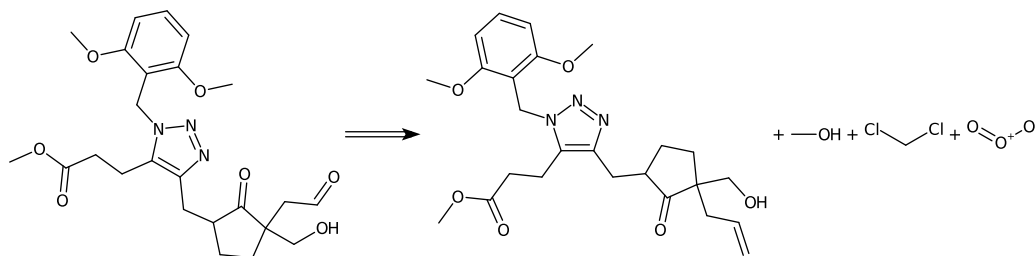

### Step 2

Type: O-TBS deprotection, Confidence: 0.937

C=CCC1(CO[Si](C)(C)C(C)(C)C)CCC(Cc2nnn(Cc3c(OC)cccc3OC)c2CCC(=O)OC)C1=O.CC#N.F>>C=CCC1(CO)CCC(Cc2nnn(Cc3c(OC)cccc3OC)c2CCC(=O)OC)C1=O

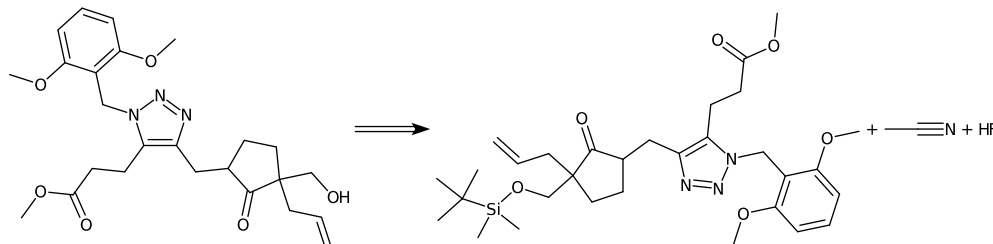

### Step 3

Type: Unrecognized, Confidence: 0.91

C=CCC1(CO[Si](C)(C)C(C)(C)C)CCCC1=O.COC(=O)CCc1c(CBr)nnn1Cc1c(OC)cccc1OC.C1CCOC1.CC(C)[N-]C(C)C.[Li+]>>C=CCC1(CO[Si](C)(C)C(C)(C)C)CCC(Cc2nnn(Cc3c(OC)cccc3OC)c2CCC(=O)OC)C1=O

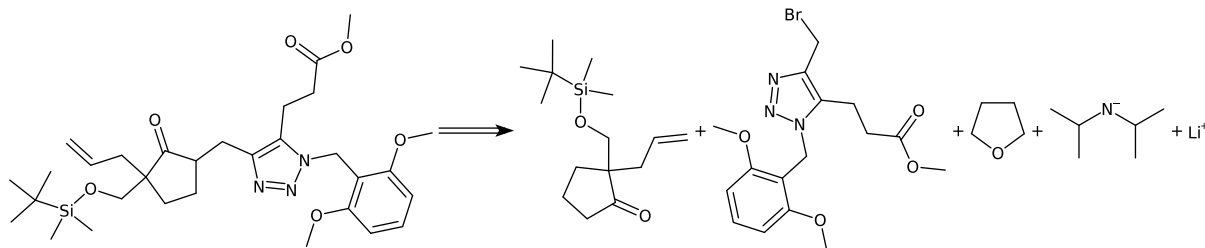

### Step 4

Type: O-TBS protection, Confidence: 0.963

C=CCC1(CO)CCCC1=O.CC(C)(C)[Si](C)(C)Cl.CN(C)c1ccncc1.ClCCl>>C=CCC1(CO[Si](C)(C)C(C)(C)C)CCCC1=O

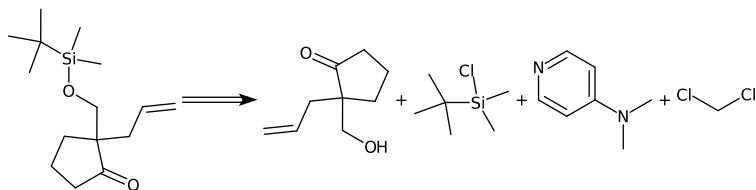

**Type:** Wohl-Ziegler bromination, **Confidence:** 0.953

COC(=O)CCc1c(C)nnn1Cc1c(OC)cccc1OC.ClC(Cl)(Cl)Cl.O=C(OOC(=O)c1ccccc1)c1ccccc1.O=C1CCC(=O)N1Br>>COC(=O)CCc1c(CBr)nnn1Cc1c(OC)cccc1OC

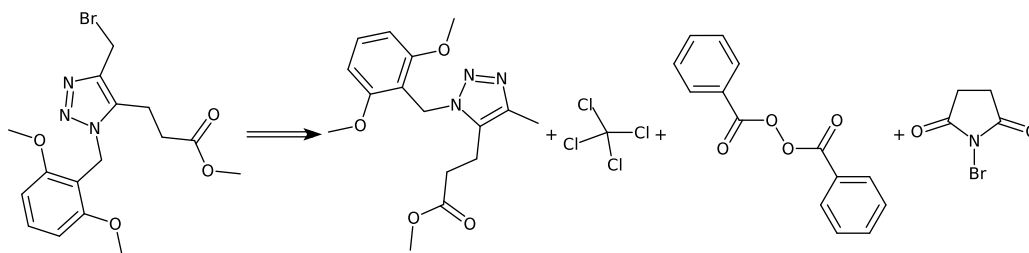

## Step 5

**Type:** O-Ac deprotection, **Confidence:** 0.905

C=CCC1(COC(C)=O)CCCC1=O.CO.O=C([O-])[O-].[K+].[K+]>>C=CCC1(CO)CCCC1=O

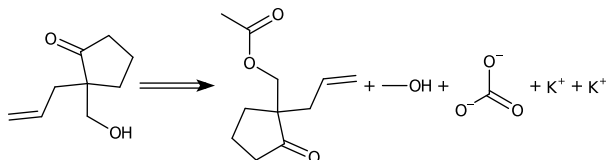

**Type:** Azide-alkyne Huisgen cycloaddition, **Confidence:** 0.8

CC#CCCC(=O)OC.COc1cccc(OC)c1CN=[N+]=[N-].[Cu]>>COC(=O)CCc1c(C)nnn1Cc1c(OC)cc1OC

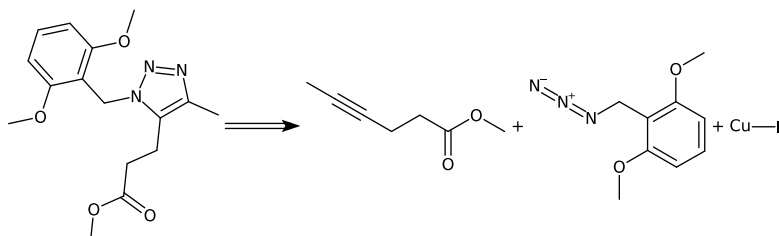

## Step 6

**Type:** Unrecognized, **Confidence:** 0.639



CC(=O)OCC1CCCC1=O.C=CCBr.CN(C)C=O.[H-].[Na+]>>C=CCC1(COC(C)=O)CCCC1=O

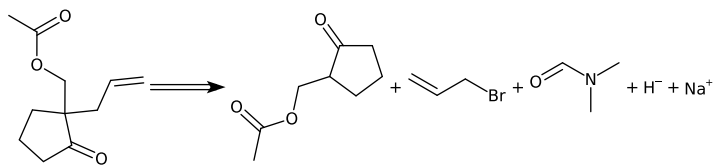

### Step 7

Type: O-Ac protection, Confidence: 0.949

CC(=O)OC(C)=O.Cl.O=C1CCCC1CO.c1ccncc1>>CC(=O)OCC1CCCC1=O

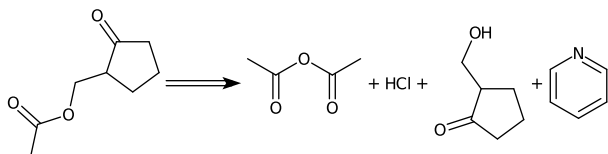

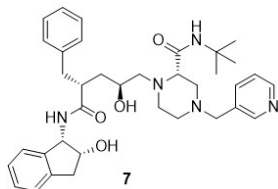

## Information about the retrosynthesis

Created On: 2019-09-27T07:36:16.955000

Model: MolecularTransformer\_v2.0\_R-Inchi-MolecularTransformer\_v2.0\_F

Product: O[C@H](CN1[C@H](C(NC(C)(C)C)=O)CN(CC2C=NC=CC=2)CC1)C[C@H](C(N[C@@H]1[C@H](O)CC2C1=CC=CC=2)=O)CC1C=CC=CC=1

MSSR: 10

FAP: 0.7

MRP: 20

SbP: 2

Available smiles:

Exclude smiles: O[C@H](CN1[C@H](C(NC(C)(C)C)=O)CN(CC2C=NC=CC=2)CC1)C[C@H](C(N[C@@H]1[C@H](O)CC2C1=CC=CC=2)=O)CC1C=CC=CC=1

Exclude substructures:

## Sequence 0, Confidence: 0.938

### Step 1

Type: Aldehyde reductive amination, Confidence: 0.938

CC(C)(C)NC(=O)[C@@H]1CNCCN1C[C@@H](O)C[C@@H](Cc1ccccc1)C(=O)N[C@H]1c2cccc2C[C@H]1O.CO.O=Cc1cccnc1.[BH3-].[Na+].[BH3-].[Na+]>>CC(C)(C)NC(=O)[C@@H]1CN(Cc2cccnc2)CCN1C[C@@H](O)C[C@@H](Cc1ccccc1)C(=O)N[C@H]1c2cccc2C[C@H]1O

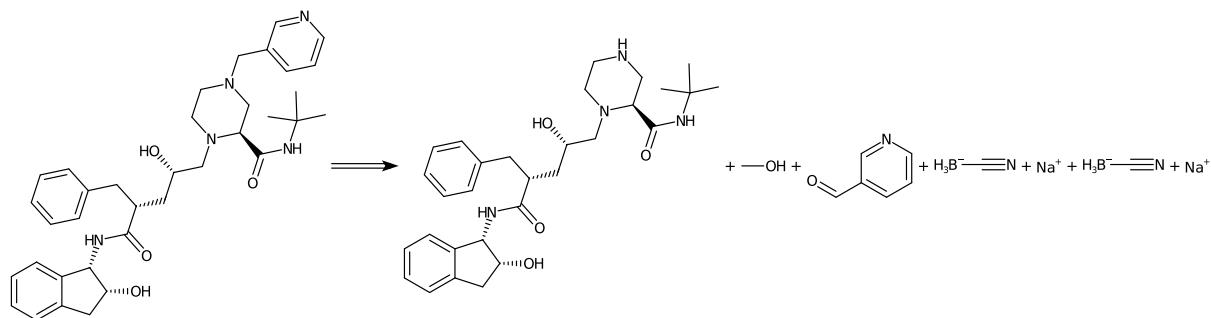

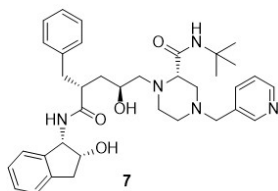

## Information about the retrosynthesis

Created On: 2019-09-27T07:36:16.955000

Model: MolecularTransformer\_v2.0\_R-Inchi-MolecularTransformer\_v2.0\_F

Product: O[C@H](CN1[C@H](C(NC(C)(C)C)=O)CN(CC2C=NC=CC=2)CC1)C[C@H](C(N[C@@H]1[C@H](O)CC2C1=CC=CC=2)=O)CC1C=CC=CC=1

MSSR: 10

FAP: 0.7

MRP: 20

SbP: 2

Available smiles:

Exclude smiles: O[C@H](CN1[C@H](C(NC(C)(C)C)=O)CN(CC2C=NC=CC=2)CC1)C[C@H](C(N[C@@H]1[C@H](O)CC2C1=CC=CC=2)=O)CC1C=CC=CC=1

Exclude substructures:

## Sequence 5, Confidence: 0.377

Metadata:

Warnings: 'UNFINISHED MESSAGE'

### Step 1

Type: Epoxide + amine coupling, Confidence: 0.869

CC(C)(C)NC(=O)[C@@H]1CN(Cc2cccnc2)CCN1.O=C(N[C@H]1c2ccccc2[C@H]1O)[C@H](Cc1ccccc1)[C@H]1CO1.CCO>>CC(C)(C)NC(=O)[C@@H]1CN(Cc2cccnc2)CCN1C[C@@H](O)C[C@@H](Cc1ccccc1)C(=O)N[C@H]1c2ccccc2[C@H]1O

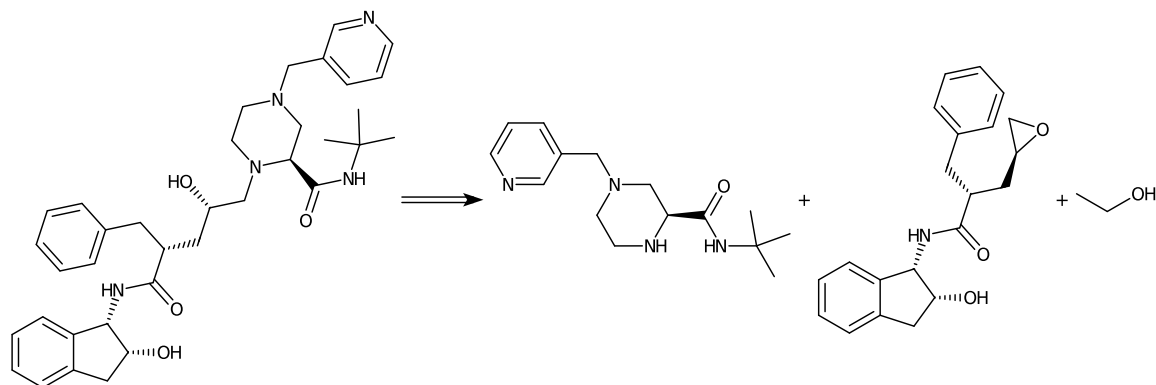

### Step 2

Type: N-Cbz deprotection, Confidence: 0.935

CC(C)(C)NC(=O)[C@@H]1CN(Cc2cccnc2)CCN1C(=O)OCc1ccccc1.CO.[C].[Pd].[HH]>>CC(C)(C)NC(=O)[C@@H]1CN(Cc2cccnc2)CCN1

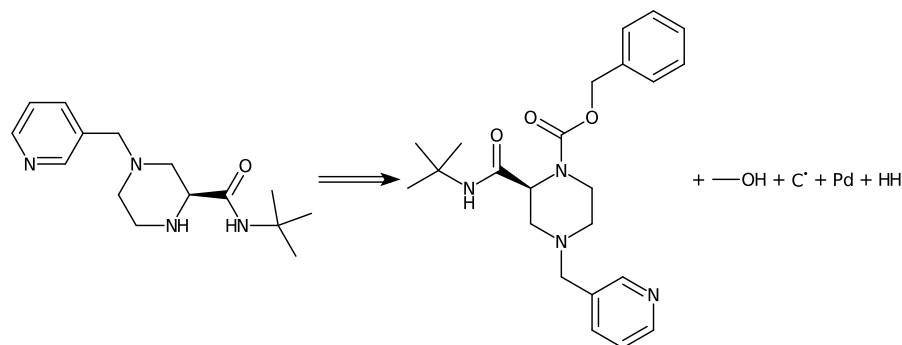

Type: Undefined, Confidence: 0.0

O=C(N[C@H]1c2ccccc2[C@H]1O)[C@H](Cc1ccccc1)[C@H]1CO1>>O=C(N[C@H]1c2ccccc2[C@H]1O)[C@H](Cc1ccccc1)[C@H]1CO1

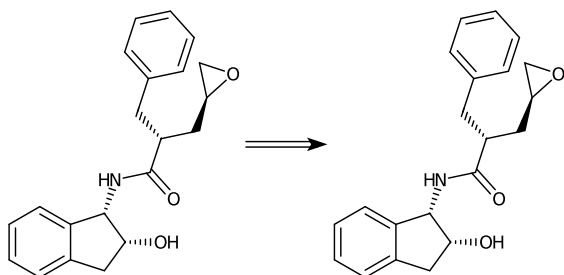

### Step 3

Type: Carboxylic acid + amine condensation, Confidence: 0.92

O=C(O)[C@@H]1CN(Cc2ccnc2)CCN1C(=O)OCc1cccc1.CC(C)(C)N>>CC(C)(C)NC(=O)[C@@H]1CN(Cc2ccnc2)CCN1C(=O)OCc1cccc1

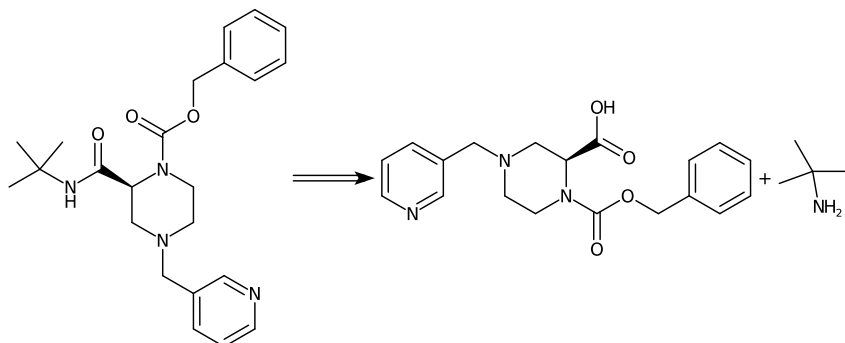

### Step 4

Type: CO<sub>2</sub>H-Et deprotection, Confidence: 0.954

CCOC(=O)[C@@H]1CN(Cc2ccnc2)CCN1C(=O)OCc1cccc1.CCO.[Na+].[OH-]>>O=C(O)[C@@H]1CN(Cc2ccnc2)CCN1C(=O)OCc1cccc1

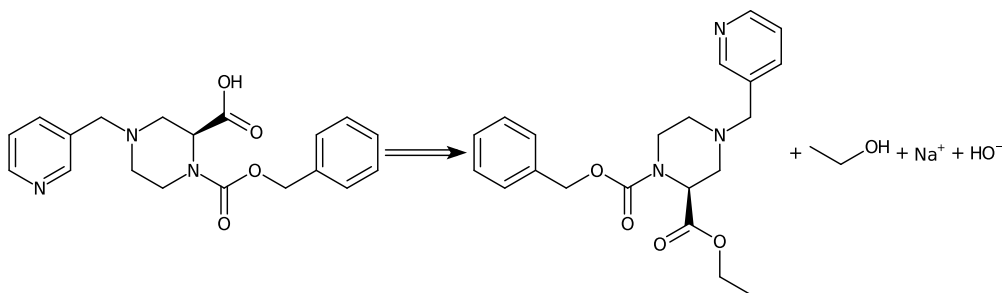

### Step 5

Type: Aldehyde reductive amination, Confidence: 0.923

CCOC(=O)[C@@H]1CNCCN1C(=O)OCc1cccc1.CC(=O)O[BH-](OC(C)=O)OC(C)=O.[Na+].ClC(Cl)O=Cc1ccnc1>>CCOC(=O)[C@@H]1CN(Cc2ccnc2)CCN1C(=O)OCc1cccc1

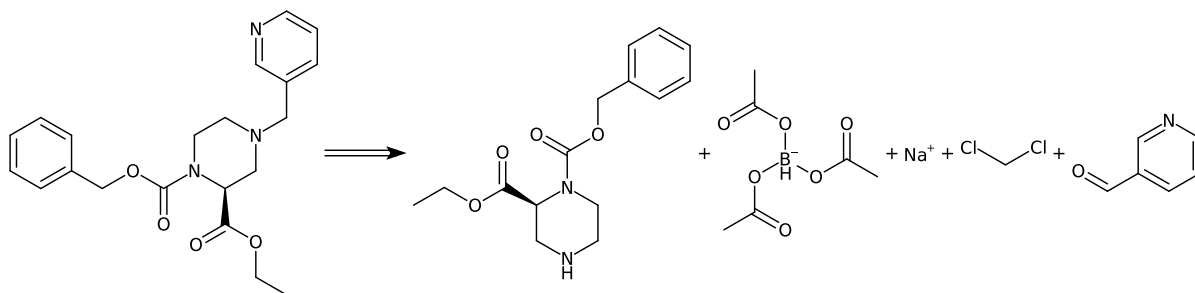

### Step 6

Type: N-Boc deprotection, Confidence: 0.871

CCOC(=O)[C@@H]1CN(C(=O)OC(C)(C)C)CCN1C(=O)OCc1ccccc1.O=C(O)C(F)(F)F>>CCOC(=O)[C@@H]1CNCCN1C(=O)OCc1ccccc1

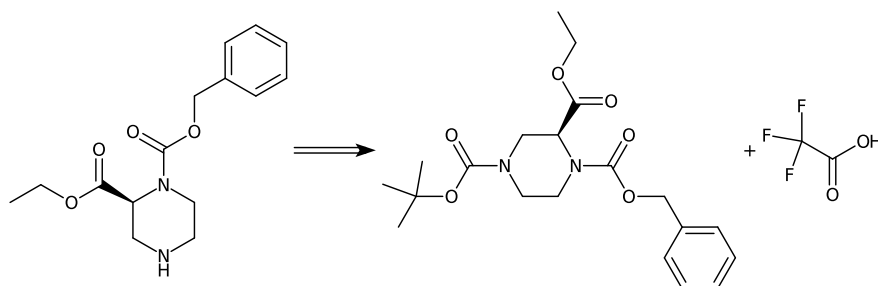

### Step 7

Type: Amide Schotten-Baumann, Confidence: 0.94

CCOC(=O)[C@@H]1CN(C(=O)OC(C)(C)C)CCN1.CCN(C(C)C)C(C)C.ClCCl.O=C(Cl)OCc1ccccc1>>CCOC(=O)[C@@H]1CN(C(=O)OC(C)(C)C)CCN1C(=O)OCc1ccccc1

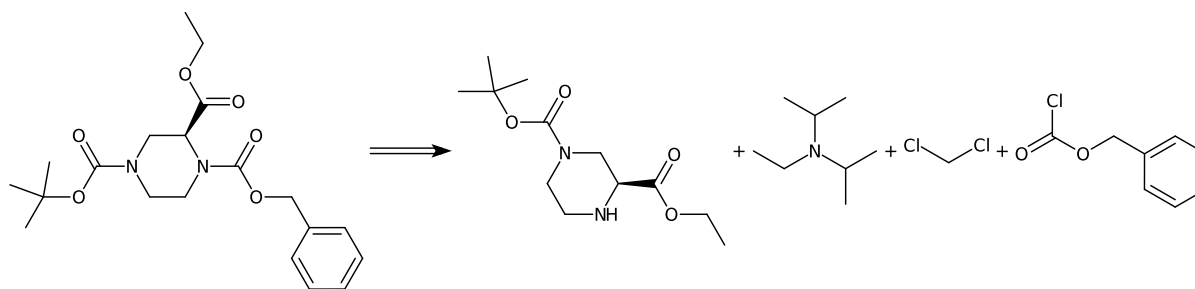

### Step 8

Type: N-Boc protection, Confidence: 0.842

CCOC(=O)[C@@H]1CNCCN1.CC(C)(C)OC(=O)OC(=O)OC(C)(C)C.CCN(CC)CC.ClCCl>>CCOC(=O)[C@@H]1CN(C(=O)OC(C)(C)C)CCN1

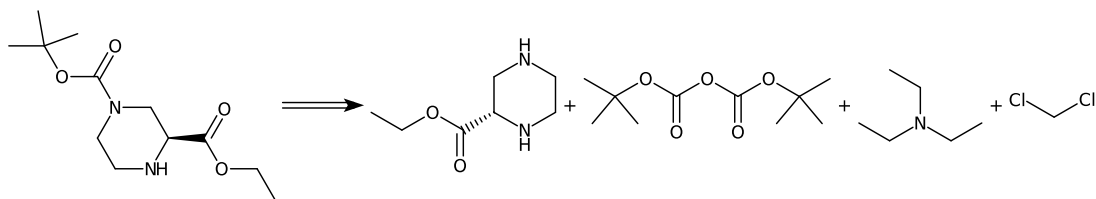

### Step 9

Type: N-Bn deprotection, Confidence: 0.89

CCOC(=O)[C@@H]1CN(Cc2ccccc2)CCN1Cc1ccccc1.CCO.[HH].[Pd]>>CCOC(=O)[C@@H]1CNCCN1

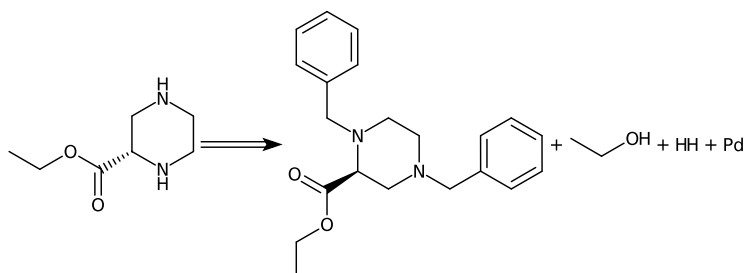

### Step 10

Type: Fischer-Speier esterification, Confidence: 0.933

O=C(O)[C@@H]1CN(Cc2ccccc2)CCN1Cc1ccccc1.CCO.O=C([O-])O.[Na+].O=S(=O)(O)O>>CCOC(=O)[C@@H]1CN(Cc2ccccc2)CCN1Cc1ccccc1

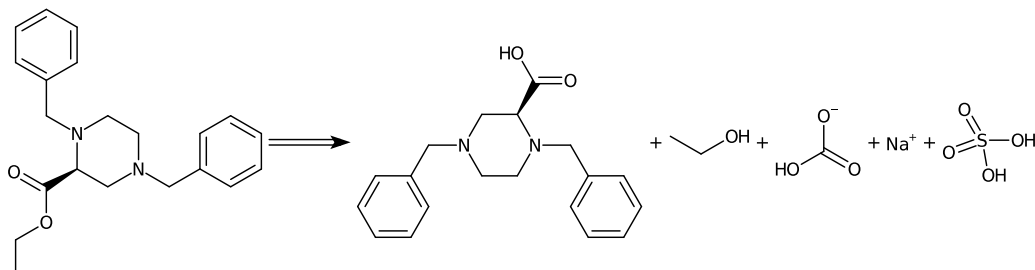



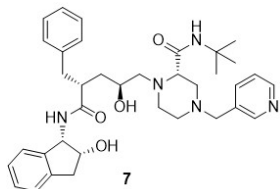

## Information about the retrosynthesis

Created On: 2019-10-01T08:58:35.823000

Model: MolecularTransformer\_v2.0\_R-Inchi-MolecularTransformer\_v2.0\_F

Product: CC(NC(C1N(CC(CC(C(NC2C(O)CC3C2=CC=CC=3)=O)CC2C=CC=CC=2)O)CCN(CC2C=NC=CC=2)C1)=O)(C)C

MSSR: 15

FAP: 0.7

MRP: 20

SbP: 2

Available smiles:

Exclude smiles: CC(NC(C1N(CC(CC(C(NC2C(O)CC3C2=CC=CC=3)=O)CC2C=CC=CC=2)O)CCN(CC2C=NC=CC=2)C1)=O)(C)C

Exclude substructures:

## Sequence 0, Confidence: 0.47

### Step 1

Type: Epoxide + amine coupling, Confidence: 0.871

CC(C)(C)NC(=O)C1CN(Cc2cccnc2)CCN1.O=C(NC1c2ccccc2CC1O)C(Cc1ccccc1)CC1CO1>>C(C)(C)NC(=O)C1CN(Cc2cccnc2)CCN1CC(O)CC(Cc1ccccc1)C(=O)NC1c2ccccc2CC1O

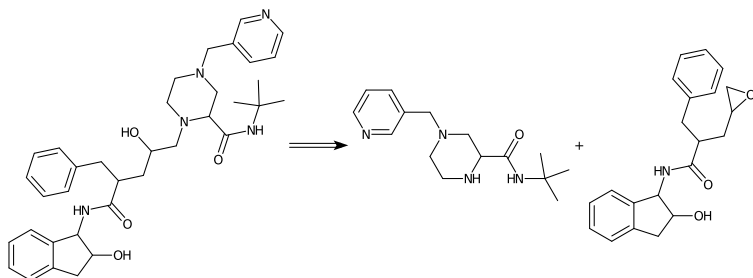

### Step 2

Type: Aldehyde reductive amination, Confidence: 0.863

CC(C)(C)NC(=O)C1CNCCN1.O=Cc1cccnc1>>CC(C)(C)NC(=O)C1CN(Cc2cccnc2)CCN1

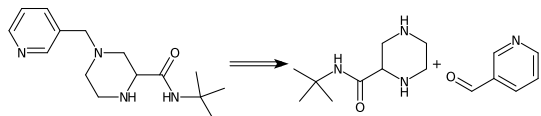

Type: Prilezhaev epoxidation, Confidence: 0.805

C=CCC(Cc1ccccc1)C(=O)NC1c2ccccc2CC1O.O=C(O)c1ccc(Cl)c1>>O=C(NC1c2ccccc2CC1O)C(Cc1ccccc1)CC1CO1

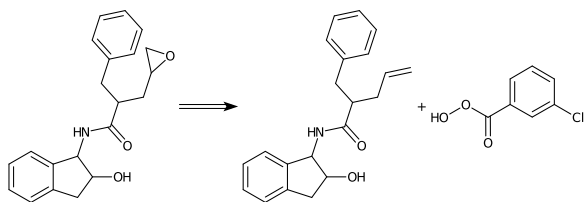

### Step 3

Type: Carboxylic acid + amine condensation, Confidence: 0.777

C=CCC(Cc1ccccc1)C(=O)O.CCN(C(C)C)C(C)C.CN(C)C(On1nnc2cccnc21)=[N+](C)C.F[P-](F)(F)(F)(F)F.ClCCl.NC1c2ccccc2CC1O.CN(C)C(On1nnc2cccnc21)=[N+](C)C.F[P-](F)(F)(F)(F)F>>C=CCC(Cc1ccccc1)C(=O)NC1c2ccccc2CC1O

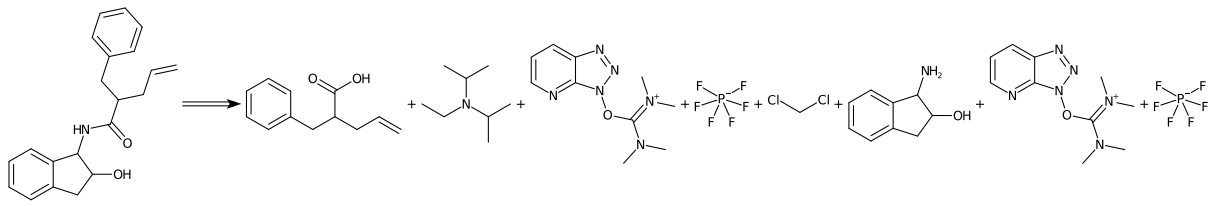

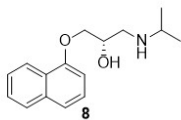

## Information about the retrosynthesis

Created On: 2019-10-01T08:32:01.771000

Model: MolecularTransformer\_v2.0\_R-Inchi-MolecularTransformer\_v2.0\_F

Product: C1=CC=CC2=CC=CC(OC[C@@H](O)CNC(C)C)=C12

MSSR: 15

FAP: 0.7

MRP: 20

SbP: 2

Available smiles:

Exclude smiles: C1=CC=CC2=CC=CC(OC[C@@H](O)CNC(C)C)=C12

Exclude substructures:

## Sequence 0, Confidence: 0.911

### Step 1

Type: Epoxide + amine coupling, Confidence: 0.911

CC(C)N.c1ccc2c(OC[C@@H](O)C)cccc2c1>>CC(C)NC[C@H](O)COc1cccc2ccccc12

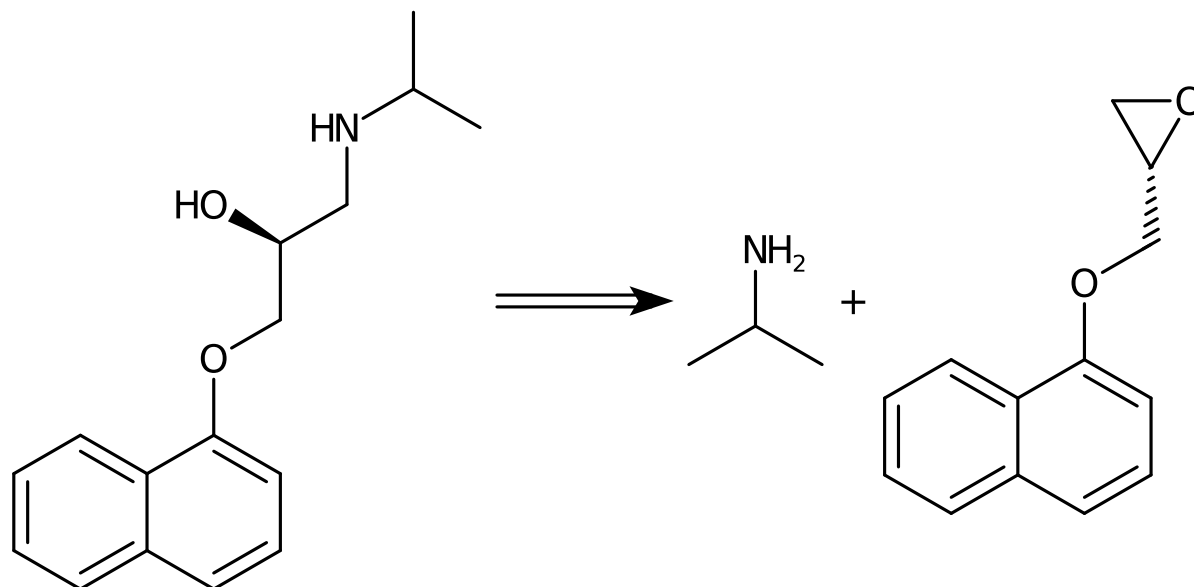

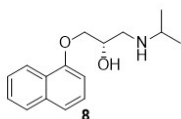

## Information about the retrosynthesis

Created On: 2019-10-01T10:21:04.636000

Model: MolecularTransformer\_v2.0\_R-Inchi-MolecularTransformer\_v2.0\_F

Product: C1=CC=CC2=CC=CC(OCC(CNC(C)C)O)=C12

MSSR: 15

FAP: 0.7

MRP: 20

SbP: 2

Available smiles: C1=CC=CC=C1

Exclude smiles: C1=CC=CC2=CC=CC(OCC(CNC(C)C)O)=C12

Exclude substructures:

## Sequence 0, Confidence: 0.833

### Step 1

Type: Epoxide + amine coupling, Confidence: 0.884

c1ccc2c(OCC3CO3)cccc2c1.CC(C)N.CO>>CC(C)NCC(O)COc1cccc2ccccc12

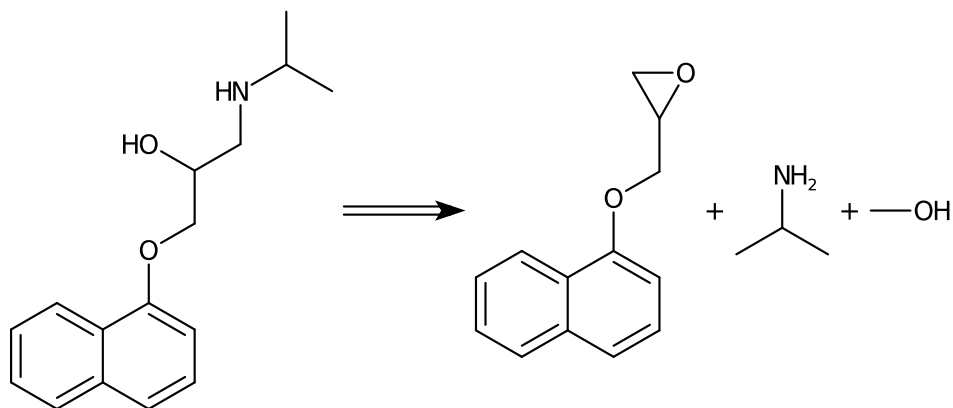

### Step 2

Type: Williamson ether synthesis, Confidence: 0.943

CN(C)C=O.ClCC1CO1.Oc1cccc2ccccc12.[H-].[Na+].[H-].[Na+]>>c1ccc2c(OCC3CO3)cccc2c1

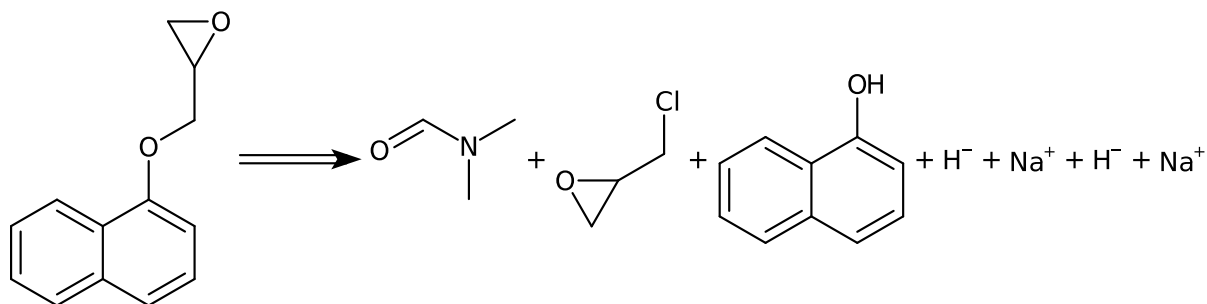

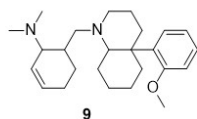

## Information about the retrosynthesis

Created On: 2019-10-02T09:38:18.325000

Model: MolecularTransformer\_v2.0\_R-Inchi-MolecularTransformer\_v2.0\_F

Product: COC1C(C23CCC(=O)CC2N(CC2C(N(C)C)C=CCC2)CCC3)=CC=CC=1

MSSR: 15

FAP: 0.6

MRP: 20

SbP: 3

Available smiles: C(=C/N(C)C)\C=C

Exclude smiles: COC1C(C23CCC(=O)CC2N(CC2C(N(C)C)C=CCC2)CCC3)=CC=CC=1

Exclude substructures:



## Sequence 0, Confidence: 0.0603

Metadata:

Warnings: The retrosynthesis did not complete. Try increasing MSSR.

### Step 1

Type: Ketone dioxolane deprotection, Confidence: 0.759

COc1cccc1C12CCCN(CC3CCC=CC3N(C)C)C1CC1(CC2)OCCO1.CCOC(C)=O.Cl>>COc1cccc1C12CCCN(CC3CCC=CC3N(C)C)C1CC(=O)CC2

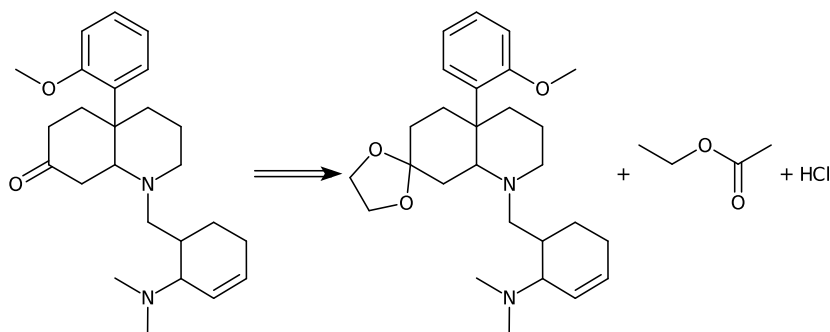

### Step 2

Type: Aldehyde reductive amination, Confidence: 0.763

CN(C)C1C=CCCC1C=O.COc1cccc1C12CCCN(C)C1CC1(CC2)OCCO1.[BH3-]C#N.[Na+]>>COc1cccc1C12CCCN(CC3CCC=CC3N(C)C)C1CC1(CC2)OCCO1

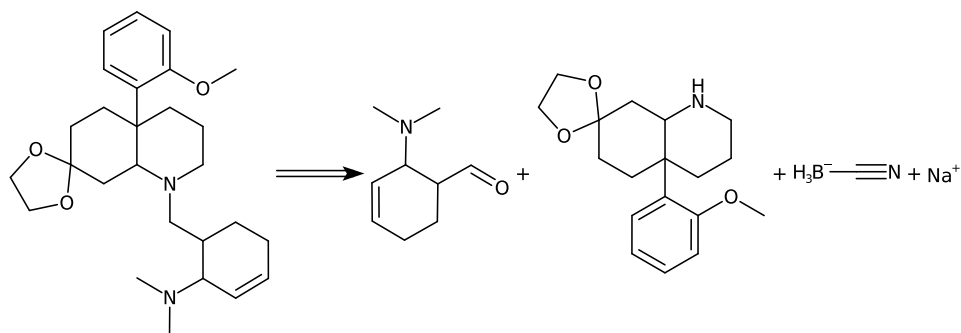

### Step 3

Type: Aldehyde Collins oxidation, Confidence: 0.924

CN(C)C1C=CCCC1CO.ClCCl.O=[Cr](=O)([O-])Cl.c1cc[nH+]cc1>>CN(C)C1C=CCCC1C=O

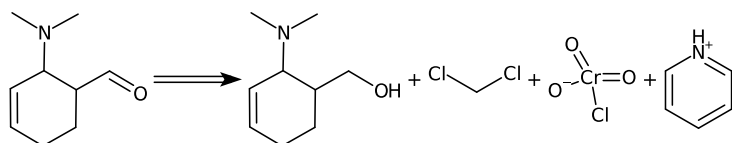

Type: Amide to amine reduction, Confidence: 0.971

COc1ccccc1C12CCC(=O)NC1CC1(CC2)OCCO1.C1CCOC1.O.[Al+3].[H-].[H-].[H-].[H-].[Li+]>>COc1ccccc1C12CCCNC1CC1(CC2)OCCO1

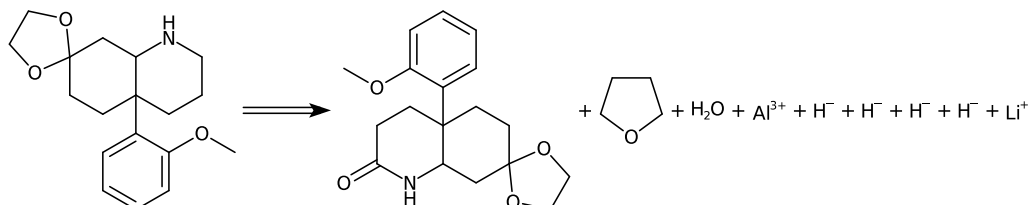

### Step 4

Type: Carboxylic acid to alcohol reduction, Confidence: 0.871

CN(C)C1C=CCCC1C(=O)O.C1CCOC1.[Al+3].[H-].[H-].[H-].[H-].[Li+]>>CN(C)C1C=CCCC1CO

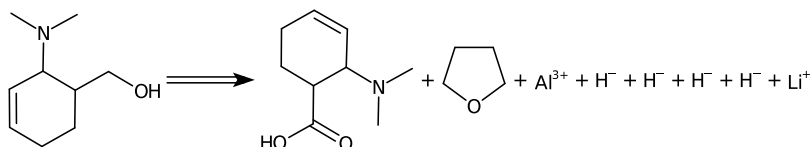

Type: Undefined, Confidence: 0.0

COc1ccccc1C12CCC(=O)NC1CC1(CC2)OCCO1>>COc1ccccc1C12CCC(=O)NC1CC1(CC2)OCCO1

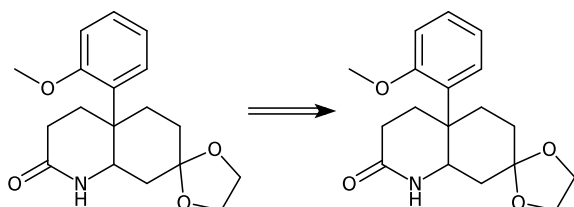

### Step 5

Type: CO<sub>2</sub>H-Me deprotection, Confidence: 0.879

COC(=O)C1CCC=CC1N(C)C.C1CCOC1.O.[Li+].[OH-]>>CN(C)C1C=CCCC1C(=O)O

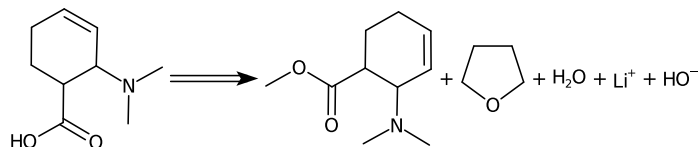

### Step 6

Type: Bromo N-alkylation, Confidence: 0.64

COC(=O)C1CCC=CC1Br.C1CCOC1.CNC>>COC(=O)C1CCC=CC1N(C)C

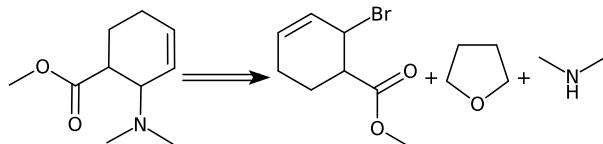

### Step 7

Type: Methyl esterification, Confidence: 0.93

O=C(O)C1CCC=CC1Br.CO.O=S(Cl)Cl>>COC(=O)C1CCC=CC1Br

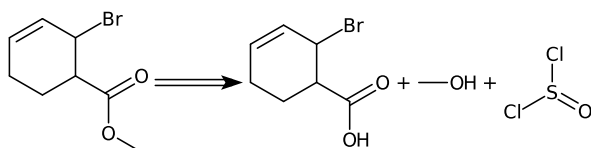

### Step 8

Type: CO<sub>2</sub>H-Et deprotection, Confidence: 0.902

CCOC(=O)C1CCC=CC1Br.C1CCOC1.O.[Li+].[OH-]>>O=C(O)C1CCC=CC1Br

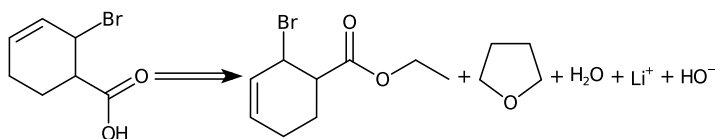

### Step 9

Type: Hydroxy to bromo, Confidence: 0.795

CCOC(=O)C1CCC=CC1O.BrP(Br)Br>>CCOC(=O)C1CCC=CC1Br

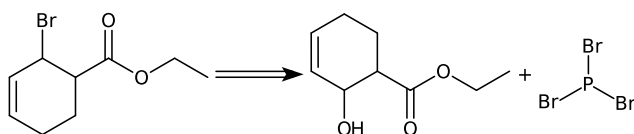

### Step 10

Type: O-TBS deprotection, Confidence: 0.761

CCOC(=O)C1CCC=CC1O[Si](C)(C)C(C)(C)C.C1CCOC1.CCCC[N+](CCCC)(CCCC)CCCC.[F-]>>CCOC(=O)C1CCC=CC1O

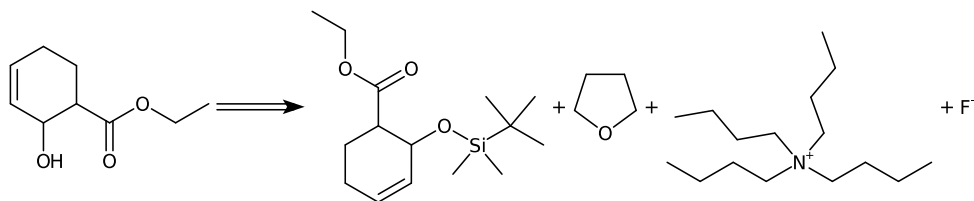

### Step 11

Type: Olefin metathesis, Confidence: 0.784

C=CCCC(C(=O)OCC)C(C=C)O[Si](C)(C)C(C)(C)C.C1CC1>>CCOC(=O)C1CCC=CC1O[Si](C)(C)C(C)(C)C

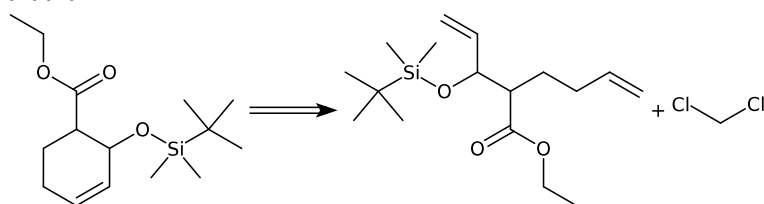

### Step 12

Type: O-TBS protection, Confidence: 0.937

C=CCCC(C(=O)OCC)C(O)C=C.CC(C)(C)[Si](C)(C)OS(=O)(=O)C(F)(F)F.C1CC1>>C=CCCC(C(=O)OCC)C(C=C)O[Si](C)(C)C(C)(C)C

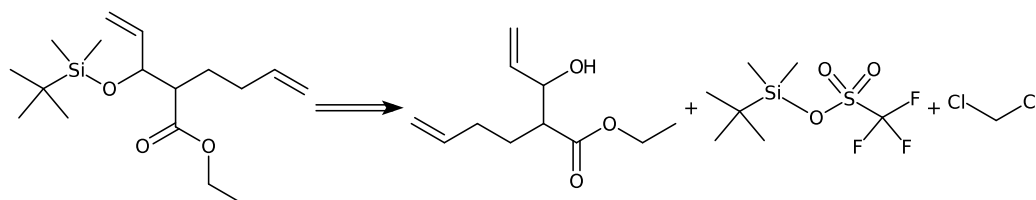

### Step 13

Type: Unrecognized, Confidence: 0.649

C=CCCCC(=O)OCC.C1CCOC1.C=CC=O.CC(C)NC(C)C.[Li]CCCC>>C=CCCC(C(=O)OCC)C(O)C=C

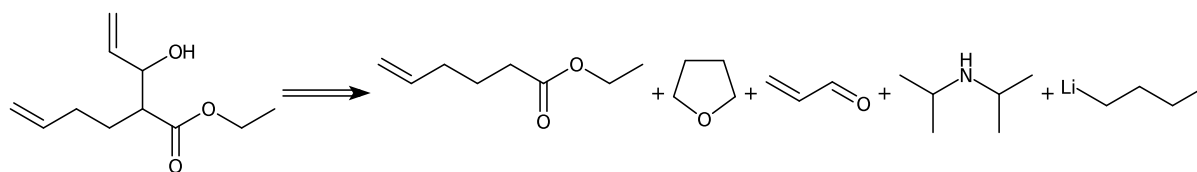

### Step 14

Type: Fischer-Speier esterification, Confidence: 0.994

C=CCCCC(=O)O.CCO.O=S(=O)(O)O>>C=CCCCC(=O)OCC

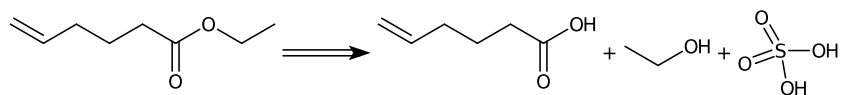

**Step 15**

Type: CO<sub>2</sub>H-Me deprotection, Confidence: 0.986

C=CCCCC(=O)OC.C1CCOC1.O.[Li]O>>C=CCCCC(=O)O

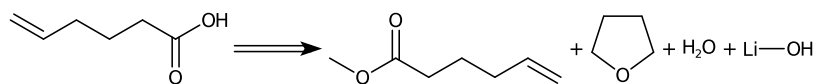

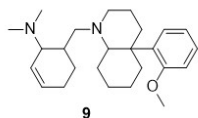

## Information about the retrosynthesis

Created On: 2019-09-27T15:37:13.273000

Model: MolecularTransformer\_v2.0\_R-Inchi-MolecularTransformer\_v2.0\_F

Product: C1CCNC2CCCCC12C1=C(OC)C=CC=C1

MSSR: 15

FAP: 0.6

MRP: 20

SbP: 3

Available smiles:

Exclude smiles: C1CCNC2CCCCC12C1=C(OC)C=CC=C1

Exclude substructures:

## Sequence 0, Confidence: 0.34

### Step 1

Type: Secondary ketimine reduction, Confidence: 0.964

COc1ccccc1C12CCCCC1=NCCC2.CO.[BH4-].[Na+]>>COc1ccccc1C12CCCCC1NCCC2

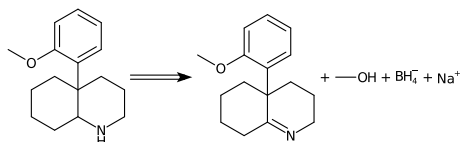

### Step 2

Type: Alkylimino-de-oxo-bisubstitution, Confidence: 0.43

COc1ccccc1C1(CCCN)CCCCC1=O.Cc1ccccc1>>COc1ccccc1C12CCCCC1=NCCC2

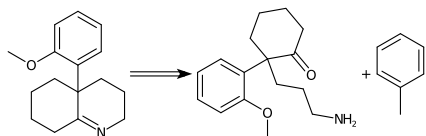

### Step 3

Type: N-Phth deprotection, Confidence: 0.966

COc1ccccc1C1(CCCN2C(=O)c3ccccc3C2=O)CCCCC1=O.NN.O>>COc1ccccc1C1(CCCN)CCCCC1=O

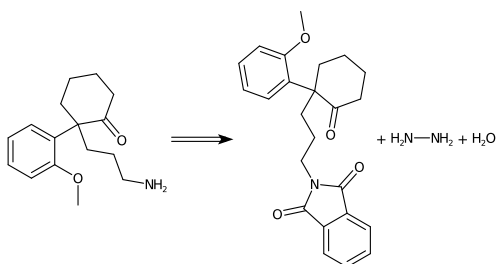

### Step 4

Type: Chloro Gabriel alkylation, Confidence: 0.951

COc1ccccc1C1(CCCCl)CCCCC1=O.CN(C)C=O.O=C1NC(=O)c2ccccc21.[K+]>>COc1ccccc1C1(CCCN2C(=O)c3ccccc3C2=O)CCCCC1=O

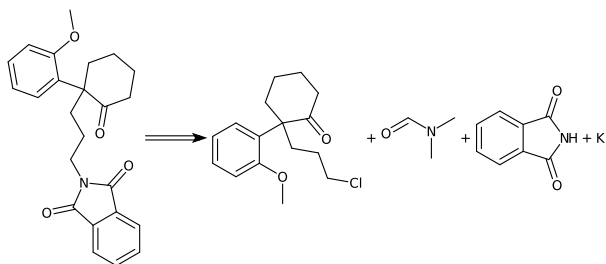

### Step 5

Type: Unrecognized, Confidence: 0.949

COc1cccc1C1CCCC1=O.CN(C)C=O.ClCCCl.O.[H-].[Na+]>>COc1cccc1C1(CCCCl)CCCC1=O

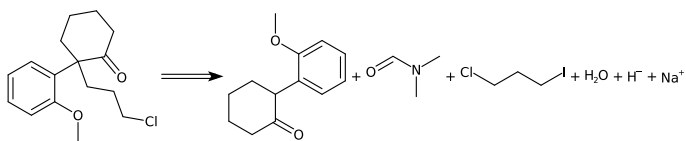

### Step 6

Type: Unrecognized, Confidence: 0.939

CC(=O)[O-].CC(=O)[O-].[Pd+2].CC(C)(C)P(c1cccc1-c1cccc1)C(C)(C)C.CC(C)(C)[O-].[Na+].COc1cccc1Br.Cc1cccc1.O=C1CCCC1.CC(=O)[O-].CC(=O)[O-].[Pd+2].CC(C)(C)[O-].[Na+]>>COc1cccc1C1CCCC1=O

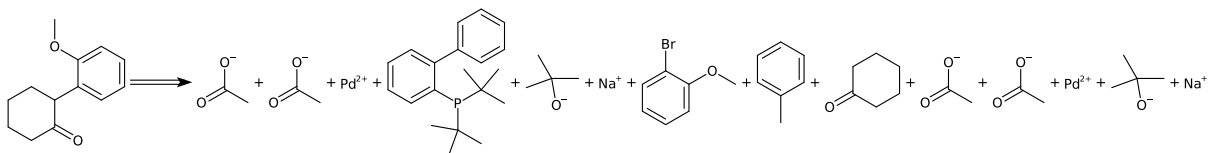





## Information about the retrosynthesis

Created On: 2019-09-27T09:06:14.426000

Model: MolecularTransformer\_v2.0\_R-Inchi-MolecularTransformer\_v2.0\_F

Product: O=C(OC1C(C(O)=O)=CC=CC=1)C

MSSR: 15

FAP: 0.75

MRP: 20

SbP: 2

Available smiles:

Exclude smiles: O=C(OC1C(C(O)=O)=CC=CC=1)C

Exclude substructures:

**Sequence 0, Confidence: 0.929**

**Step 1**

Type: O-Ac protection, Confidence: 0.929

CC(=O)OC(C)=O.O.O=C(O)c1ccccc1O.c1ccncc1>>CC(=O)Oc1ccccc1C(=O)O

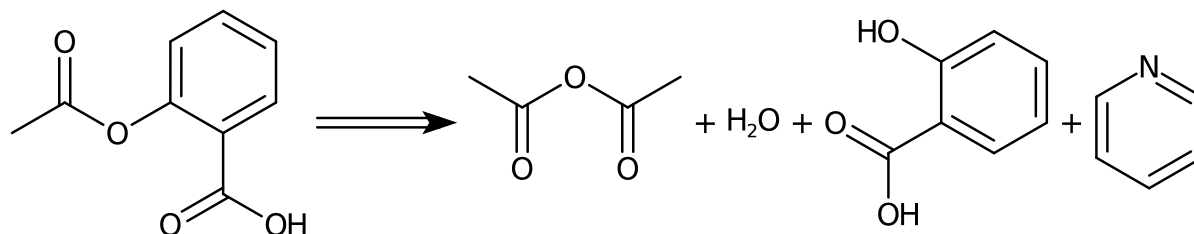



## Information about the retrosynthesis

Created On: 2019-09-27T09:08:04.135000

Model: MolecularTransformer\_v2.0\_R-Inchi-MolecularTransformer\_v2.0\_F

Product: O=S(N)(C1C=CC(N2C(C3C=CC(C)=CC=3)=CC(C(F)(F)F)=N2)=CC=1)=O

MSSR: 15

FAP: 0.75

MRP: 20

SbP: 2

Available smiles:

Exclude smiles: O=S(N)(C1C=CC(N2C(C3C=CC(C)=CC=3)=CC(C(F)(F)F)=N2)=CC=1)=O

Exclude substructures:

## Sequence 0, Confidence: 0.921

### Step 1

Type: Fluoro N-arylation, Confidence: 0.921

Cc1ccc(-c2cc(C(F)(F)F)n[nH]2)cc1.NS(=O)(=O)c1ccc(F)cc1>>Cc1ccc(-c2cc(C(F)(F)F)nn2-c2cc(S(N)(=O)=O)cc2)cc1

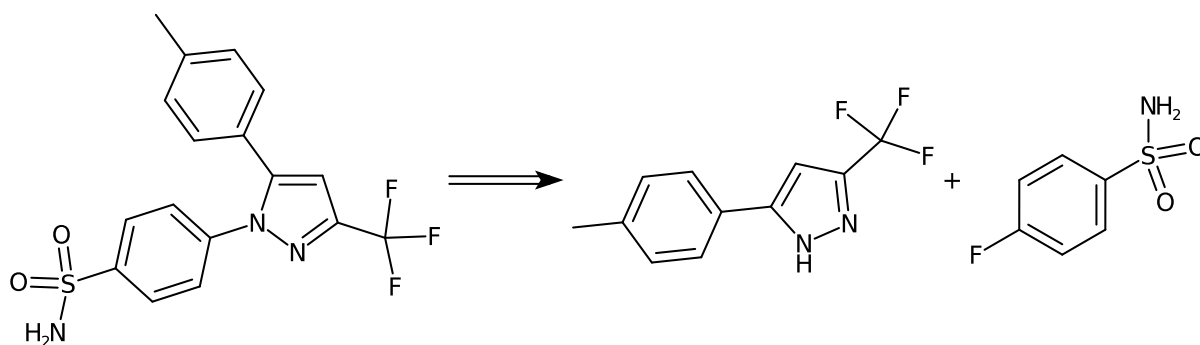



## Information about the retrosynthesis

Created On: 2019-10-01T11:46:30.813000

Model: MolecularTransformer\_v2.0\_R-Inchi-MolecularTransformer\_v2.0\_F

Product: CC1C=CC(C2N(C3C=CC(S(=O)(=O)N)=CC=3)N=C(C(F)(F)F)C=2)=CC=1

MSSR: 15

FAP: 0.75

MRP: 20

SbP: 2

Available smiles: C1=CC=CC=C1

Exclude smiles: CC1C=CC(C2N(C3C=CC(S(=O)(=O)N)=CC=3)N=C(C(F)(F)F)C=2)=CC=1

Exclude substructures:

## Sequence 0, Confidence: 0.81

### Step 1

Type: Knorr pyrazole synthesis, Confidence: 0.906

Cc1ccc(C(=O)CC(=O)C(F)(F)F)cc1.NNc1ccc(S(N)(=O)=O)cc1.O>>Cc1ccc(-c2cc(C(F)(F)F)nn2-c2ccc(S(N)(=O)=O)cc2)cc1

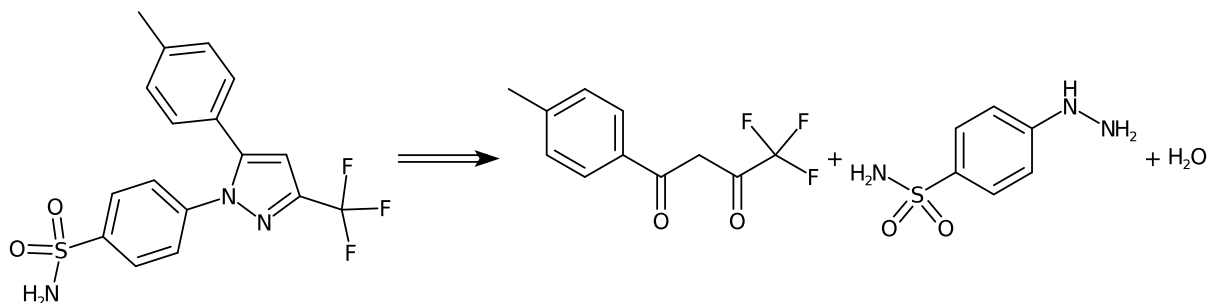

### Step 2

Type: Unrecognized, Confidence: 0.977

CC(=O)c1ccc(C)cc1.C1CCOC1.CCOC(=O)C(F)(F)F.Cl.[H-].[Na+]>>Cc1ccc(C(=O)CC(=O)C(F)(F)F)cc1

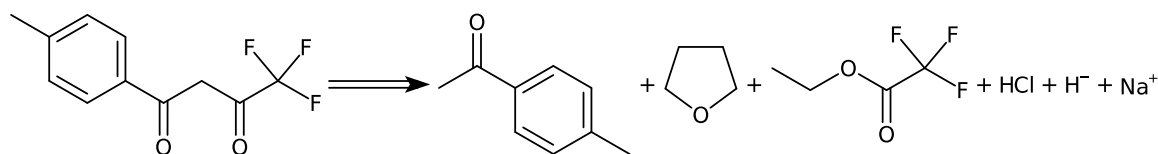

Type: Fluoro to hydrazino, Confidence: 0.953

NS(=O)(=O)c1ccc(F)cc1.NN.O>>NNc1ccc(S(N)(=O)=O)cc1

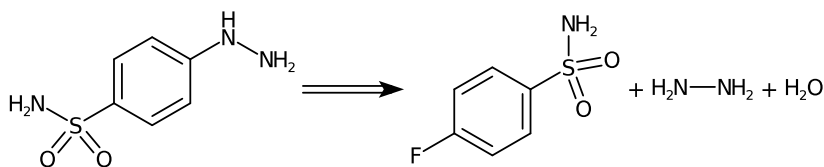

### Step 3

Type: Bromo Grignard + nitrile ketone synthesis, Confidence: 0.997

Cc1ccc(C#N)cc1.C[Mg+].[Br-]>>CC(=O)c1ccc(C)cc1

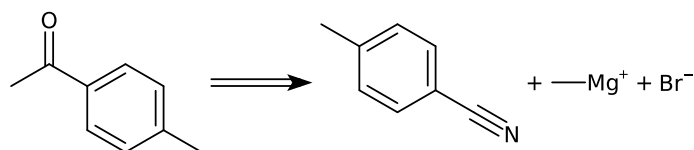

Type: Chlorosulfonyl to sulfamoyl, Confidence: 0.985

C1CCOC1.O=S(=O)(Cl)c1ccc(F)cc1.[NH4+].[OH-].[NH4+].[OH-]>>NS(=O)(=O)c1ccc(F)cc1

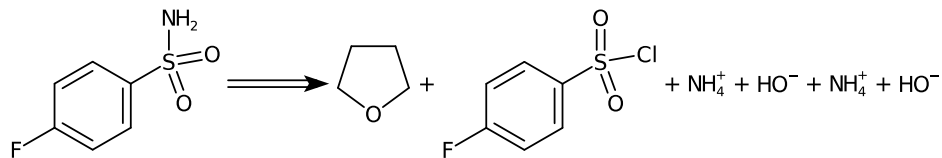

#### Step 4

Type: Rosenmund van Braun cyanation, Confidence: 0.978

Cc1ccc(Br)cc1.N#C[Cu]>>Cc1ccc(C#N)cc1

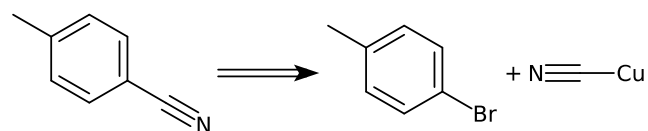



## Information about the retrosynthesis

Created On: 2019-09-27T09:07:08.967000

Model: MolecularTransformer\_v2.0\_R-Inchi-MolecularTransformer\_v2.0\_F

Product: CN1C(=O)C/N=C(/C2C=CC=CC=2)\C2C=C(C=CC1=2)Cl

MSSR: 15

FAP: 0.75

MRP: 20

SbP: 2

Available smiles:

Exclude smiles: CN1C(=O)C/N=C(/C2C=CC=CC=2)\C2C=C(C=CC1=2)Cl

Exclude substructures:



**Sequence 0, Confidence: 0.977**

**Step 1**

Type: Chloro Suzuki-type coupling, Confidence: 0.977

CN1C(=O)CN=C(Cl)c2cc(Cl)ccc21.OB(O)c1ccccc1>>CN1C(=O)CN=C(c2ccccc2)c2cc(Cl)ccc2  
1

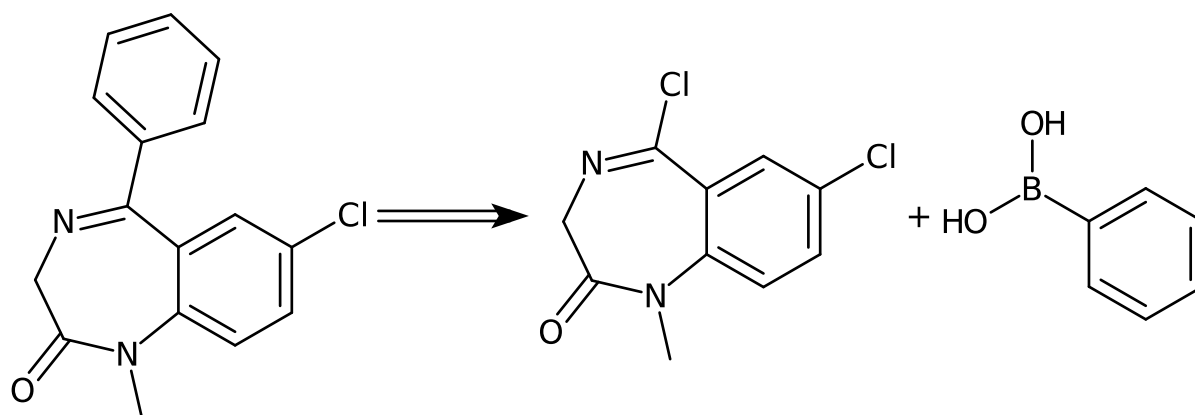



## Information about the retrosynthesis

Created On: 2019-09-27T09:07:08.967000

Model: MolecularTransformer\_v2.0\_R-Inchi-MolecularTransformer\_v2.0\_F

Product: CN1C(=O)C/N=C(/C2C=CC=CC=2)\C2C=C(C=CC1=2)Cl

MSSR: 15

FAP: 0.75

MRP: 20

SbP: 2

Available smiles:

Exclude smiles: CN1C(=O)C/N=C(/C2C=CC=CC=2)\C2C=C(C=CC1=2)Cl

Exclude substructures:

## Sequence 1, Confidence: 0.762

### Step 1

Type: Iodo N-methylation, Confidence: 0.967

O=C1CN=C(c2ccccc2)c2cc(Cl)ccc2N1.Cl.CN(C)C=O.O.[H-].[Na+].[HH]>>CN1C(=O)CN=C(c2ccccc2)c2cc(Cl)ccc21

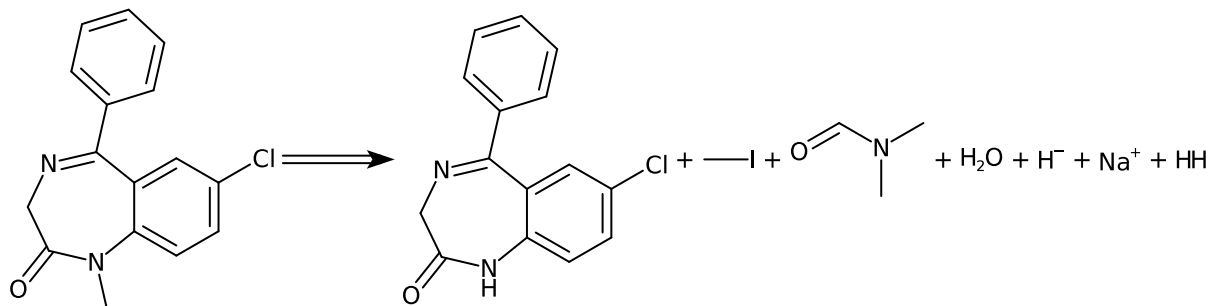

### Step 2

Type: Unrecognized, Confidence: 0.788

O=C(CCl)Nc1ccc(Cl)cc1C(=O)c1ccccc1.[NH4+].[OH-].[NH4+].[OH-]>>O=C1CN=C(c2ccccc2)c2cc(Cl)ccc2N1

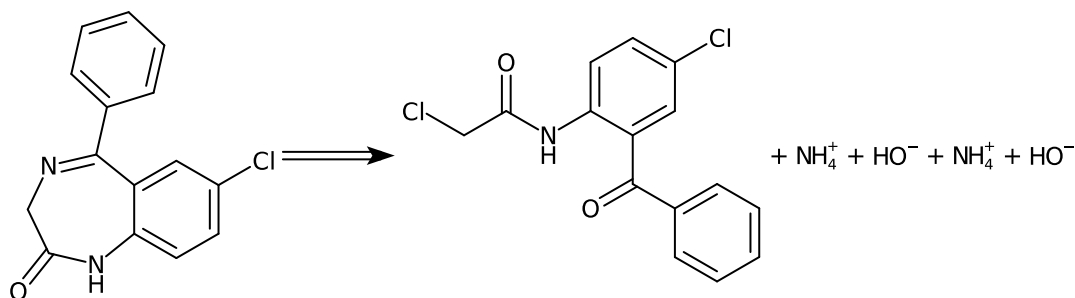

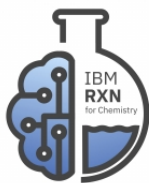

## Information about the retrosynthesis

Created On: 2019-10-01T12:22:08.704000

Model: MolecularTransformer\_v2.0\_R-Inchi-MolecularTransformer\_v2.0\_F

Product: CN1C2C(=CC(=CC=2)Cl)/C(/C2C=CC=CC=2)=N\CC1=O

MSSR: 15

FAP: 0.75

MRP: 20

SbP: 2

Available smiles: C1=CC=CC=C1

Exclude smiles: CN1C2C(=CC(=CC=2)Cl)/C(/C2C=CC=CC=2)=N\CC1=O

Exclude substructures:

## Sequence 0, Confidence: 0.679

### Step 1

Type: Iodo N-methylation, Confidence: 0.967

O=C1CN=C(c2ccccc2)c2cc(Cl)ccc2N1.Cl.CN(C)C=O.O.[H-].[Na+].[HH]>>CN1C(=O)CN=C(c2ccccc2)c2cc(Cl)ccc21

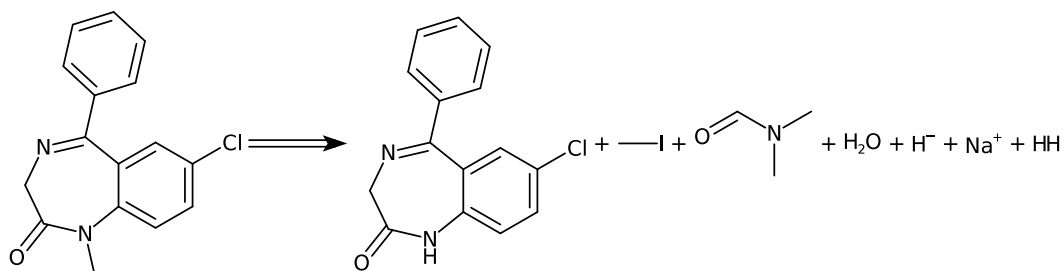

### Step 2

Type: Unrecognized, Confidence: 0.788

O=C(CCl)Nc1ccc(Cl)cc1C(=O)c1ccccc1.[NH4+].[OH-]>>O=C1CN=C(c2ccccc2)c2cc(Cl)ccc2N1

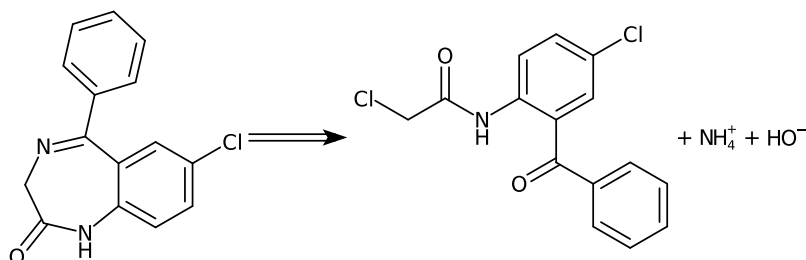

### Step 3

Type: Amide Schotten-Baumann, Confidence: 0.966

Nc1ccc(Cl)cc1C(=O)c1ccccc1.ClCCl.O=C(Cl)CCl.O=C([O-])O.[Na+]>>O=C(CCl)Nc1ccc(Cl)cc1C(=O)c1ccccc1

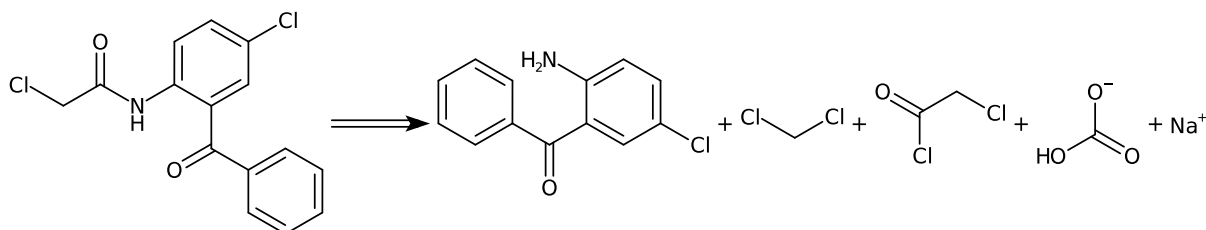

### Step 4

Type: Bromo Grignard + nitrile ketone synthesis, Confidence: 0.964

N#Cc1cc(Cl)ccc1N.Br[Mg]c1ccccc1.C1CCOC1>>Nc1ccc(Cl)cc1C(=O)c1ccccc1

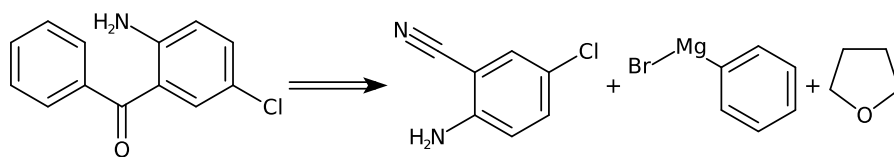

### Step 5

Type: Chlorination, Confidence: 0.957

CC(=O)O.N#Cc1ccccc1N.O.O=C1CCC(=O)N1Cl>>N#Cc1cc(Cl)ccc1N

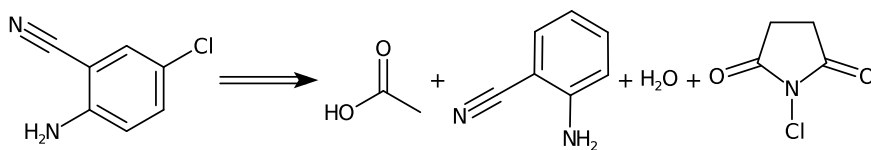



## Information about the retrosynthesis

Created On: 2019-09-27T09:06:41.671000

Model: MolecularTransformer\_v2.0\_R-Inchi-MolecularTransformer\_v2.0\_F

Product: O=C(CN(CC)CC)NC1C(C)=CC=CC=1C

MSSR: 15

FAP: 0.75

MRP: 20

SbP: 2

Available smiles:

Exclude smiles: O=C(CN(CC)CC)NC1C(C)=CC=CC=1C

Exclude substructures:

**Sequence 0, Confidence: 0.98**

**Step 1**

Type: Bromo N-alkylation, Confidence: 0.98

CCNCC.Cc1cccc(C)c1NC(=O)CBr>>CCN(CC)CC(=O)Nc1c(C)cccc1C

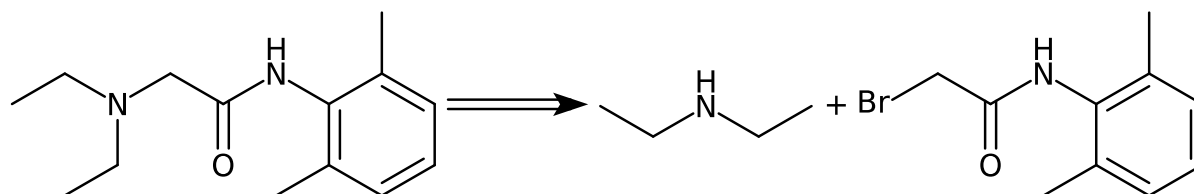





## Information about the retrosynthesis

Created On: 2019-10-01T12:37:41.867000

Model: MolecularTransformer\_v2.0\_R-Inchi-MolecularTransformer\_v2.0\_F

Product: CCN(CC(NC1C(C)=CC=CC=1C)=O)CC

MSSR: 15

FAP: 0.75

MRP: 20

SbP: 2

Available smiles: C1=CC=CC=C1

Exclude smiles: CCN(CC(NC1C(C)=CC=CC=1C)=O)CC

Exclude substructures:

## Sequence 0, Confidence: 0.959

### Step 1

Type: Bromo N-alkylation, Confidence: 0.98

Cc1cccc(C)c1NC(=O)CBr.CCNCC>>CCN(CC)CC(=O)Nc1c(C)cccc1C

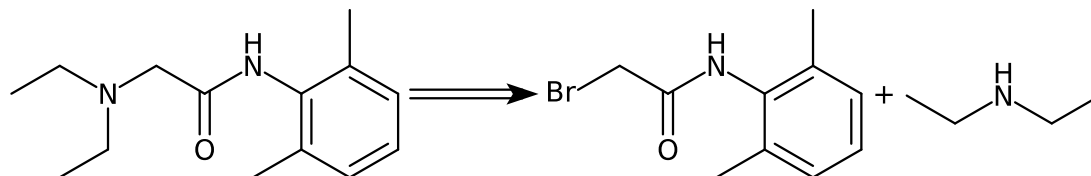

### Step 2

Type: Amide Schotten-Baumann, Confidence: 0.978

Cc1cccc(C)c1N.ClCCl.O=C(Br)CBr.c1ccncc1>>Cc1cccc(C)c1NC(=O)CBr

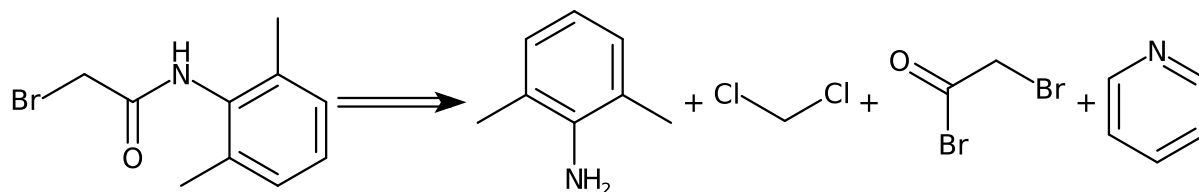



## Information about the retrosynthesis

Created On: 2019-09-27T09:07:50.027000

Model: MolecularTransformer\_v2.0\_R-Inchi-MolecularTransformer\_v2.0\_F

Product:

O=C([C@H](CCC1C=CC=CC=1)N[C@@H](C)C(N1CC2C=CC=CC=2C[C@H]1C(O)=O)=O)OCC

MSSR: 15

FAP: 0.75

MRP: 20

SbP: 2

Available smiles:

Exclude smiles:

O=C([C@H](CCC1C=CC=CC=1)N[C@@H](C)C(N1CC2C=CC=CC=2C[C@H]1C(O)=O)=O)OCC

Exclude substructures:

## Sequence 0, Confidence: 0.874

### Step 1

Type: O-Bn deprotection, Confidence: 0.956

CCOC(=O)[C@H](CCc1ccccc1)N[C@@H](C)C(=O)N1Cc2ccccc2[C@H]1C(=O)OCc1ccccc1.CCO.[C].[Pd]>>CCOC(=O)[C@H](CCc1ccccc1)N[C@@H](C)C(=O)N1Cc2ccccc2[C@H]1C(=O)O

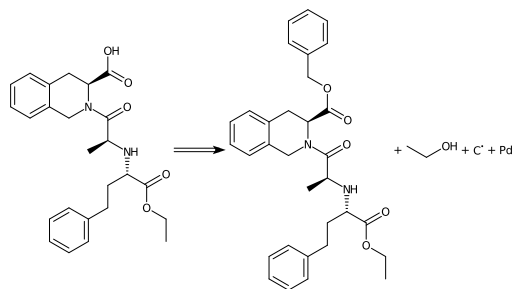

### Step 2

Type: Carboxylic acid + amine condensation, Confidence: 0.915

CCN(C(C)C)C(C)C.CCOC(=O)[C@H](CCc1ccccc1)N[C@@H](C)C(=O)O.CN(C)C(On1nnc2cccn21)=[N+](C)C.F[P-](F)(F)(F)F.FN(C)C=O.O=C(OCc1ccccc1)[C@@H]1Cc2ccccc2CN1.CN(C)C(On1nnc2cccn21)=[N+](C)C.F[P-](F)(F)(F)F>>CCOC(=O)[C@H](CCc1ccccc1)N[C@@H](C)C(=O)N1Cc2ccccc2[C@H]1C(=O)OCc1ccccc1

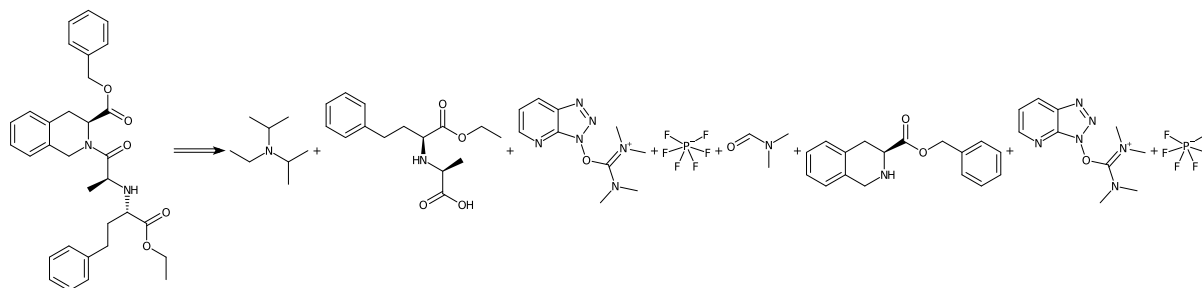



## Information about the retrosynthesis

Created On: 2019-09-27T09:07:36.533000

Model: MolecularTransformer\_v2.0\_R-Inchi-MolecularTransformer\_v2.0\_F

Product: O=C([C@H](C)NCC1C=CC(OCC2C=C(F)C=CC=2)=CC=1)N

MSSR: 15

FAP: 0.75

MRP: 20

SbP: 2

Available smiles:

Exclude smiles: O=C([C@H](C)NCC1C=CC(OCC2C=C(F)C=CC=2)=CC=1)N

Exclude substructures:

## Sequence 0, Confidence: 0.899

### Step 1

Type: Aldehyde reductive amination, Confidence: 0.899

CO.C[C@H](N)C(N)=O.O=Cc1ccc(OCc2cccc(F)c2)cc1.[BH3-]C#N.[Na+].[BH3-]C#N.[Na+]>>C[C@H](NCc1ccc(OCc2cccc(F)c2)cc1)C(N)=O

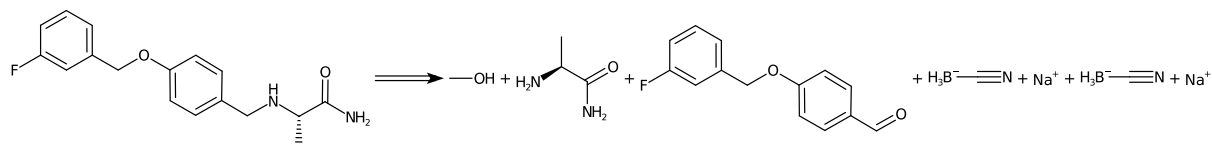



## Information about the retrosynthesis

Created On: 2019-10-01T12:47:48.394000

Model: MolecularTransformer\_v2.0\_R-Inchi-MolecularTransformer\_v2.0\_F

Product: C[C@@H](C(=O)N)NCC1C=CC(OCC2C=C(F)C=CC=2)=CC=1

MSSR: 15

FAP: 0.75

MRP: 20

SbP: 2

Available smiles: C1=CC=CC=C1

Exclude smiles: C[C@@H](C(=O)N)NCC1C=CC(OCC2C=C(F)C=CC=2)=CC=1

Exclude substructures:

## Sequence 0, Confidence: 0.666

### Step 1

Type: Aldehyde reductive amination, Confidence: 0.899

C[C@H](N)C(N)=O.O=Cc1ccc(OCc2cccc(F)c2)cc1.CO.[BH3-]C#N.[Na+]>>C[C@H](NCc1ccc(O Cc2cccc(F)c2)cc1)C(N)=O

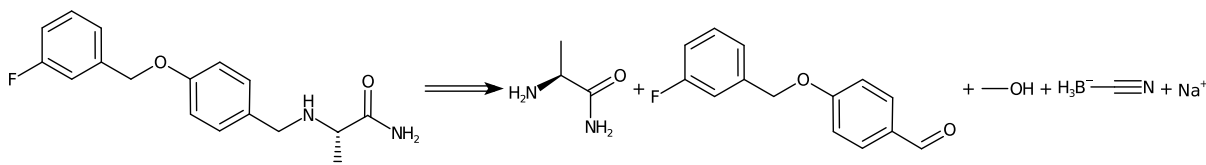

### Step 2

Type: N-Cbz deprotection, Confidence: 0.919

C[C@H](NC(=O)OCc1ccccc1)C(N)=O.CO.[HH].[Pd]>>C[C@H](N)C(N)=O

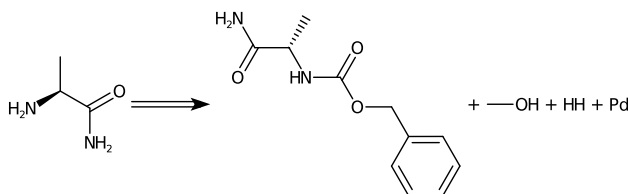

Type: Williamson ether synthesis, Confidence: 0.97

CC(C)=O.Fc1cccc(CBr)c1.O=C([O-])[O-].[K+].[K+].O=Cc1ccc(O)cc1.O=C([O-])[O-].[K+].[K+]>>O=Cc1ccc(OCc2cccc(F)c2)cc1

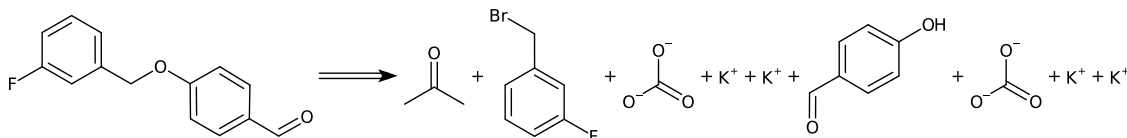

### Step 3

Type: Carboxy ester to carbamoyl, Confidence: 0.94

COC(=O)[C@H](C)NC(=O)OCc1ccccc1.CO.N>>C[C@H](NC(=O)OCc1ccccc1)C(N)=O

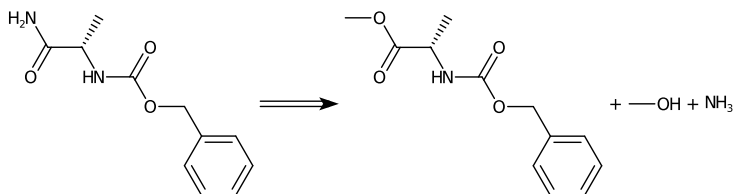



### Step 4

Type: Fischer-Speier esterification, Confidence: 0.964

C[C@H](NC(=O)OCc1ccccc1)C(=O)O.CO.O=S(=O)(O)O>>COC(=O)[C@H](C)NC(=O)OCc1ccccc1

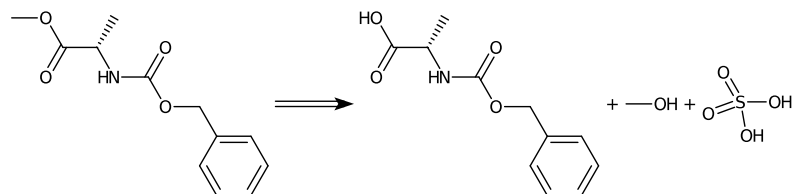

### Step 5

Type: Amide Schotten-Baumann, Confidence: 0.917

C[C@H](N)C(=O)O.O.O=C(Cl)OCc1ccccc1.[Na+].[OH-].[Na+].[OH-]>>C[C@H](NC(=O)OCc1ccccc1)C(=O)O

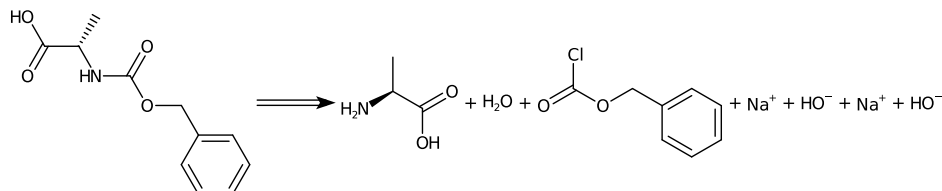



## Information about the retrosynthesis

Created On: 2019-09-27T09:06:28.528000

Model: MolecularTransformer\_v2.0\_R-Inchi-MolecularTransformer\_v2.0\_F

Product: [O-][N+](C1N(CC(C)O)C(C)=NC=1)=O

MSSR: 15

FAP: 0.75

MRP: 20

SbP: 2

Available smiles:

Exclude smiles: [O-][N+](C1N(CC(C)O)C(C)=NC=1)=O

Exclude substructures:

## Sequence 0, Confidence: 0.829

### Step 1

Type: Unrecognized, Confidence: 0.888

Cc1ncc([N+](=O)[O-])o1.CC(O)CN.CCO>>Cc1ncc([N+](=O)[O-])n1CC(C)O

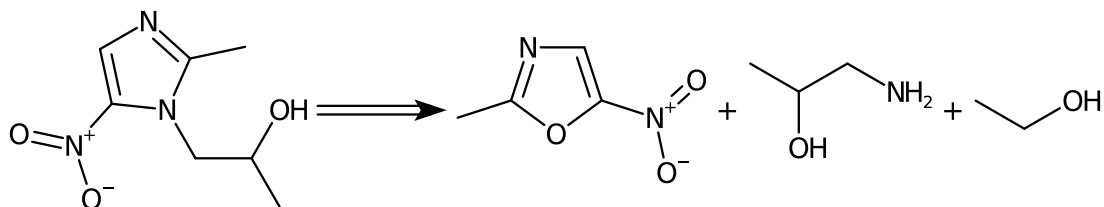

### Step 2

Type: Nitration, Confidence: 0.934

Cc1ncco1.O=S(=O)(O)O.O=[N+](O-)[O-].[K+].O=[N+](O-)[O-].[K+]>>Cc1ncc([N+](=O)[O-])o1

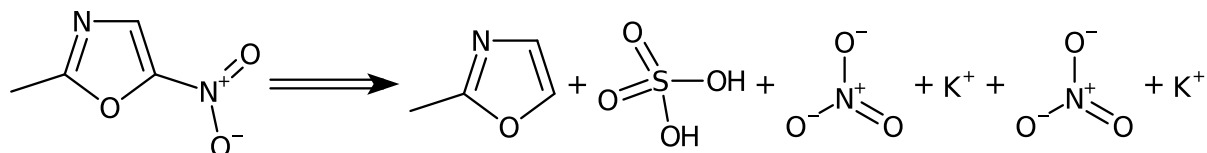



## Information about the retrosynthesis

Created On: 2019-09-30T16:22:07.824000

Model: MolecularTransformer\_v2.0\_R-Inchi-MolecularTransformer\_v2.0\_F

Product: CC(CC(C1C(=O)OC2C(=CC=CC=2)C=1O)C1C=CC=CC=1)=O

MSSR: 15

FAP: 0.7

MRP: 20

SbP: 2

Available smiles:

Exclude smiles: CC(CC(C1C(=O)OC2C(=CC=CC=2)C=1O)C1C=CC=CC=1)=O

Exclude substructures:

## Sequence 0, Confidence: 0.789

### Step 1

Type: Unrecognized, Confidence: 0.789

CC(=O)/C=C/c1ccccc1.CCN(CC)CC.CO.O=c1cc(O)c2ccccc2o1>>CC(=O)CC(c1ccccc1)c1c(O)c2ccccc2oc1=O

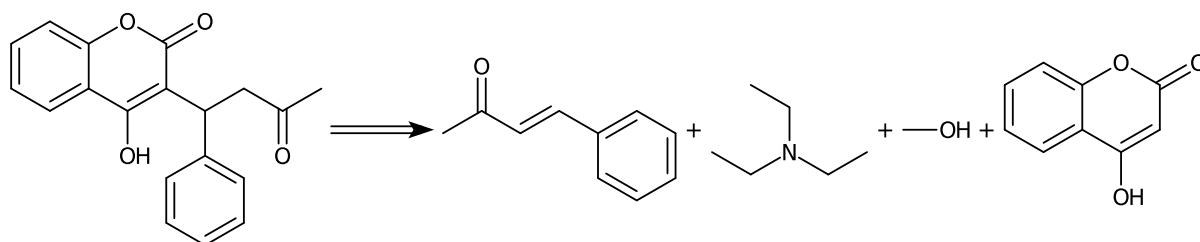



## Information about the retrosynthesis

Created On: 2019-09-30T16:22:07.824000

Model: MolecularTransformer\_v2.0\_R-Inchi-MolecularTransformer\_v2.0\_F

Product: CC(CC(C1C(=O)OC2C(=CC=CC=2)C=1O)C1C=CC=CC=1)=O

MSSR: 15

FAP: 0.7

MRP: 20

SbP: 2

Available smiles:

Exclude smiles: CC(CC(C1C(=O)OC2C(=CC=CC=2)C=1O)C1C=CC=CC=1)=O

Exclude substructures:

## Sequence 0, Confidence: 0.789

### Step 1

Type: Unrecognized, Confidence: 0.789

CC(=O)/C=C/c1ccccc1.CCN(CC)CC.CO.O=c1cc(O)c2ccccc2o1>>CC(=O)CC(c1ccccc1)c1c(O)c2ccccc2oc1=O





## Information about the retrosynthesis

Created On: 2019-09-26T17:08:00.636000

Model: MolecularTransformer\_v2.0\_R-Inchi-MolecularTransformer\_v2.0\_F

Product:

C1C=CC([Se]C2C(=O)C3=C(OC4(CCCC3O4)CCCCC3C=CC(OCOC)=CC=3)CC2)=CC=1

MSSR: 15

FAP: 0.75

MRP: 20

SbP: 2

Available smiles:

Exclude smiles:

C1C=CC([Se]C2C(=O)C3=C(OC4(CCCC3O4)CCCCC3C=CC(OCOC)=CC=3)CC2)=CC=1

Exclude substructures:



## Sequence 0, Confidence: 0.427

Metadata:

Warnings: 'ERROR MESSAGE'

### Step 1

Type: Unrecognized, Confidence: 0.498

COCOc1ccc(CCCCC23CCCC(O2)C2=C(CCCC2=O)O3)cc1.C1CCOC1.CC(C)[N-]C(C)C.[Li+].[Cl-].[NH4+].c1ccc([Se][Se]c2ccccc2)cc1>>COCOc1ccc(CCCCC23CCCC(O2)C2=C(CCC([Se]c4c cccc4)C2=O)O3)cc1

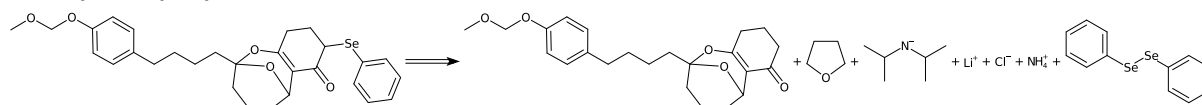

### Step 2

Type: Alkyne to alkane hydrogenation, Confidence: 0.929

COCOc1ccc(C#CCCC23CCCC(O2)C2=C(CCCC2=O)O3)cc1.[HH].[Pd]>>COCOc1ccc(CCCCC23CCCC(O2)C2=C(CCCC2=O)O3)cc1

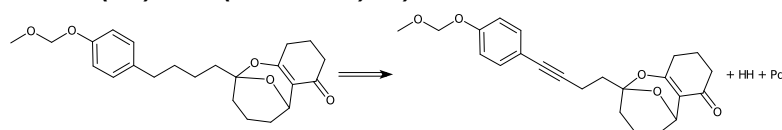

### Step 3

Type: Iodo Sonogashira coupling, Confidence: 0.923

C#CCCC12CCCC(O1)C1=C(CCCC1=O)O2.COCOc1ccc(I)cc1.Cl[Pd](Cl)([P](c1ccccc1)(c1ccc c1)c1ccccc1)[P](c1ccccc1)(c1ccccc1)c1ccccc1.[Cu]I>>COCOc1ccc(C#CCCC23CCCC(O2)C2 =C(CCCC2=O)O3)cc1

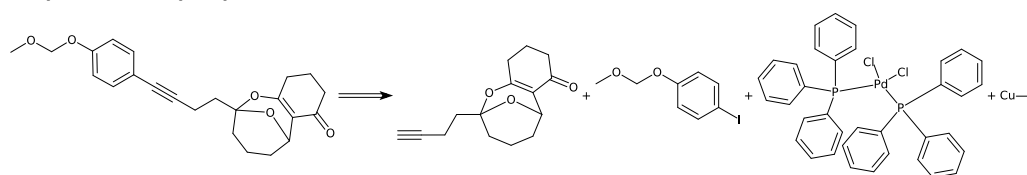

### Step 4

Type: Undefined, Confidence: 0.0

C#CCCC12CCCC(O1)C1=C(CCCC1=O)O2>>C#CCCC12CCCC(O1)C1=C(CCCC1=O)O2

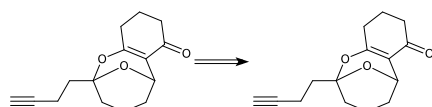



## Information about the retrosynthesis

Created On: 2019-09-26T17:08:12.317000

Model: MolecularTransformer\_v2.0\_R-Inchi-MolecularTransformer\_v2.0\_F

Product: N#CC1(CC1)COC1N=C(CI)N=C(N2CCC(C3=NNC4=NC=NC=C34)CC2)N=1

MSSR: 15

FAP: 0.75

MRP: 20

SbP: 2

Available smiles:

Exclude smiles: N#CC1(CC1)COC1N=C(CI)N=C(N2CCC(C3=NNC4=NC=NC=C34)CC2)N=1

Exclude substructures:

## Sequence 0, Confidence: 0.524

### Step 1

Type: *S<sub>N</sub>Ar ether synthesis*, Confidence: 0.926

Clc1nc(Cl)nc(N2CCC(c3n[nH]c4ncnc34)CC2)n1.N#CC1(CO)CC1>>N#CC1(COc2nc(Cl)nc(N3CCC(c4n[nH]c5ncnc45)CC3)n2)CC1

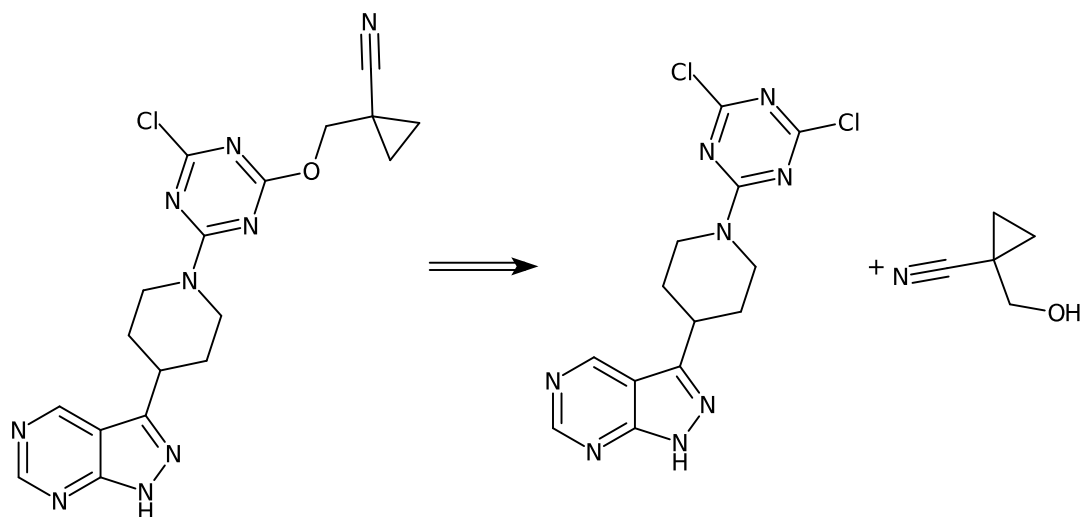

### Step 2

Type: *Chloro N-arylation*, Confidence: 0.862

c1ncc2c(C3CCNCC3)n[nH]c2n1.C1CCOC1.CCN(CC)CC.Clc1nc(Cl)nc(Cl)n1>>Clc1nc(Cl)nc(N2CCC(c3n[nH]c4ncnc34)CC2)n1

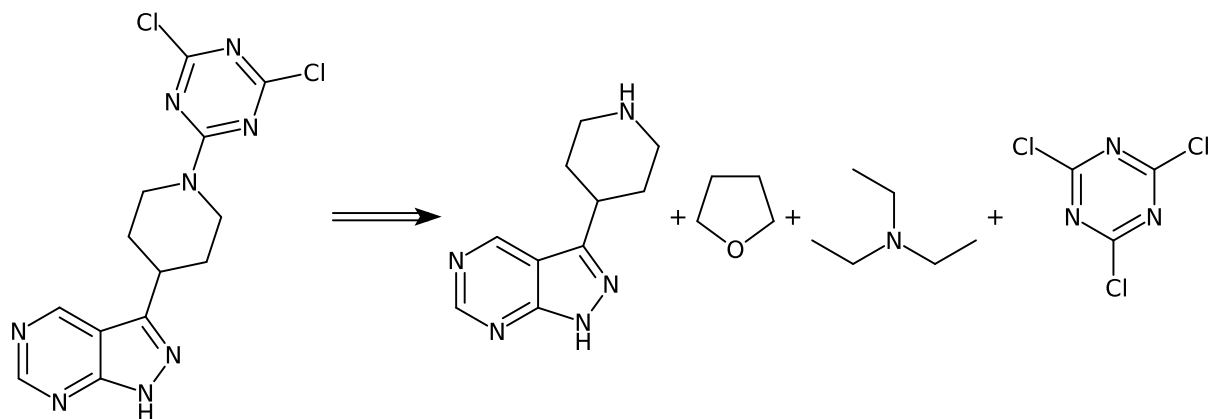

### Step 3

Type: *N-Boc deprotection*, Confidence: 0.839

CC(C)(C)OC(=O)N1CCC(c2n[nH]c3ncnc23)CC1.Cl>>c1ncc2c(C3CCNCC3)n[nH]c2n1

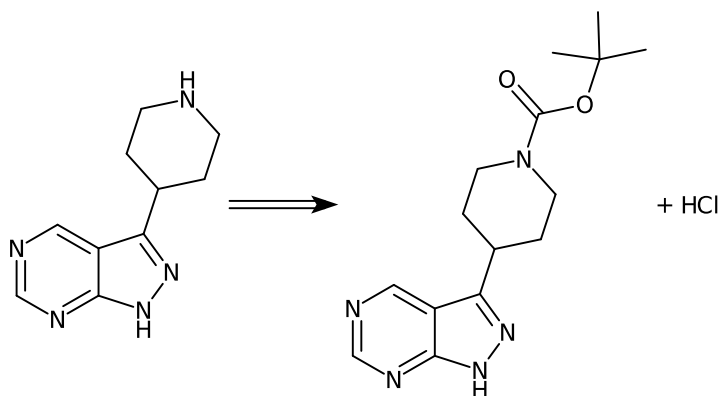

### Step 4

Type: Alkene hydrogenation, Confidence: 0.905

CC(C)(C)OC(=O)N1CC=C(c2n[nH]c3ncncc23)CC1.CCO.[Pd]>>CC(C)(C)OC(=O)N1CCC(c2n[nH]c3ncncc23)CC1

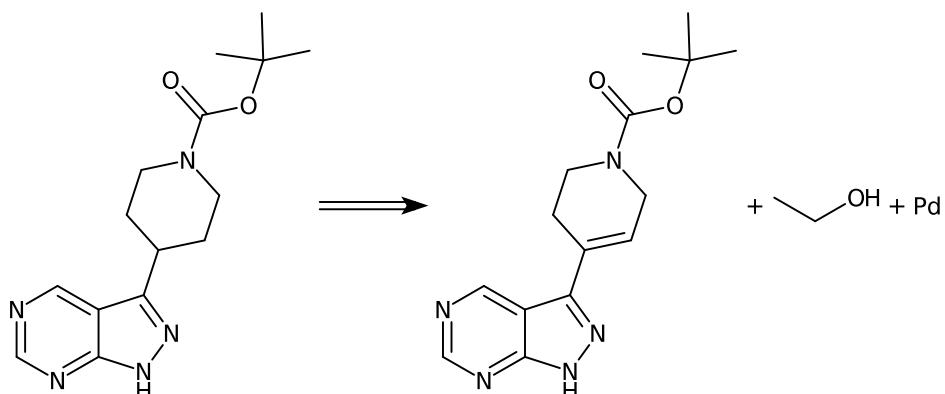

### Step 5

Type: Bromo Suzuki-type coupling, Confidence: 0.866

Brc1n[nH]c2ncncc12.CC(C)(C)OC(=O)N1CC=C(B2OC(C)(C)C(C)(C)O2)CC1>>CC(C)(C)OC(=O)N1CC=C(c2n[nH]c3ncncc23)CC1

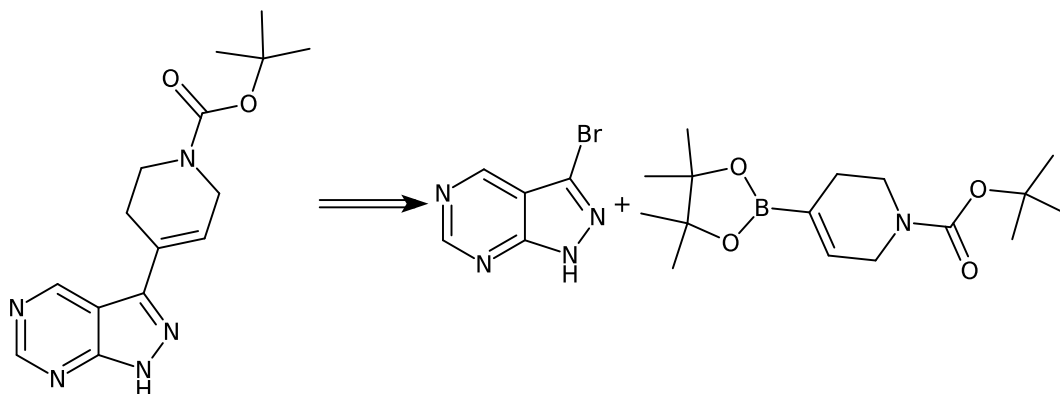



## Information about the retrosynthesis

Created On: 2019-09-26T17:08:24.616000

Model: MolecularTransformer\_v2.0\_R-Inchi-MolecularTransformer\_v2.0\_F

Product:

C1NCCN(C(C2C=C(C3=NOC(CN(CCN4CCCC4)C(CC4C=CC=CC=4)=O)=N3)C=CC=2)=O)CC1

MSSR: 15

FAP: 0.75

MRP: 20

SbP: 2

Available smiles:

Exclude smiles:

C1NCCN(C(C2C=C(C3=NOC(CN(CCN4CCCC4)C(CC4C=CC=CC=4)=O)=N3)C=CC=2)=O)CC1

Exclude substructures:

## Sequence 0, Confidence: 0.723

### Step 1

Type: N-Boc deprotection, Confidence: 0.929

CC(C)(C)OC(=O)N1CCCN(C(=O)c2ccccc(-c3noc(CN(CCN4CCCCC4)C(=O)Cc4ccccc4)n3)c2)CC1>>O=C(Cc1ccccc1)N(CCN1CCCCC1)Cc1nc(-c2ccccc(C(=O)N3CCCNCC3)c2)no1

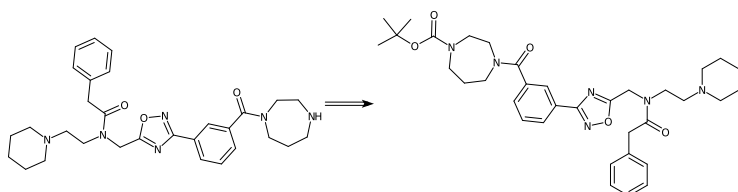

### Step 2

Type: Amide Schotten-Baumann, Confidence: 0.908

CC(C)(C)OC(=O)N1CCCN(C(=O)c2ccccc(-c3noc(CNCCN4CCCCC4)n3)c2)CC1.O=C(Cl)Cc1ccccc1.c1ccncc1>>CC(C)(C)OC(=O)N1CCCN(C(=O)c2ccccc(-c3noc(CN(CCN4CCCCC4)C(=O)Cc4ccccc4)n3)c2)CC1

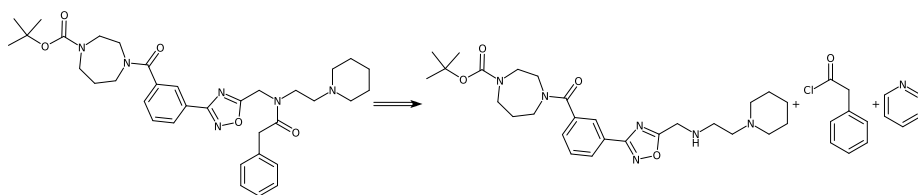

### Step 3

Type: Chloro N-alkylation, Confidence: 0.902

CC(C)(C)OC(=O)N1CCCN(C(=O)c2ccccc(-c3noc(CCl)n3)c2)CC1.CC#N.NCCN1CCCCC1.O=C([O-])[O-].[K+].[K+]>>CC(C)(C)OC(=O)N1CCCN(C(=O)c2ccccc(-c3noc(CNCCN4CCCCC4)n3)c2)CC1

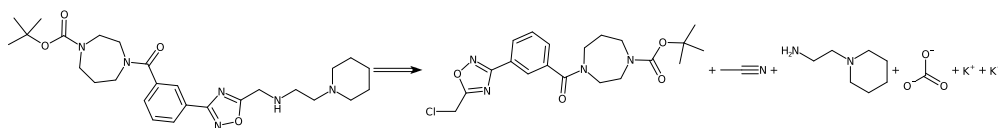

### Step 4

Type: Carboxylic acid + amine condensation, Confidence: 0.95

CC(C)(C)OC(=O)N1CCCNCC1.CCN(C(C)C)C(C)C.CN(C)C(On1nnc2cccnc21)=[N+](C)C.F[P-](F)(F)(F)F.ClCCl.O=C(O)c1ccccc(-c2noc(CCl)n2)c1.CN(C)C(On1nnc2cccnc21)=[N+](C)C.F[P-](F)(F)(F)F>>CC(C)(C)OC(=O)N1CCCN(C(=O)c2ccccc(-c3noc(CCl)n3)c2)CC1

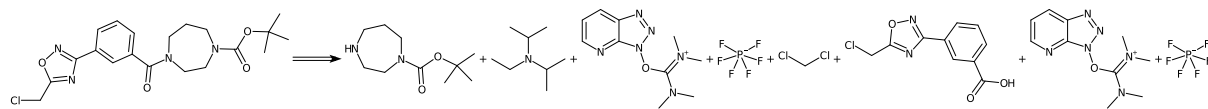



## Information about the retrosynthesis

Created On: 2019-10-01T13:05:14.059000

Model: MolecularTransformer\_v2.0\_R-Inchi-MolecularTransformer\_v2.0\_F

Product:

O=C(N(CC1ON=C(C2C=C(C(N3CCNCCC3)=O)C=CC=2)N=1)CCN1CCCCC1)CC1C=CC=CC=1

MSSR: 15

FAP: 0.7

MRP: 20

SbP: 2

Available smiles: C1=CC=CC=C1

Exclude smiles:

O=C(N(CC1ON=C(C2C=C(C(N3CCNCCC3)=O)C=CC=2)N=1)CCN1CCCCC1)CC1C=CC=CC=1

Exclude substructures:



## Sequence 0, Confidence: 0.64

### Step 1

Type: N-Boc deprotection, Confidence: 0.929

CC(C)(C)OC(=O)N1CCCN(C(=O)c2ccccc(-c3noc(CN(CCN4CCCCC4)C(=O)Cc4ccccc4)n3)c2)CC1>>O=C(Cc1ccccc1)N(CCN1CCCC1)Cc1nc(-c2ccccc(C(=O)N3CCCNCC3)c2)no1

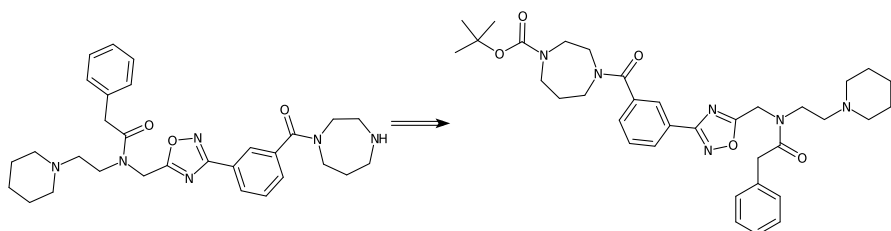

### Step 2

Type: Amide Schotten-Baumann, Confidence: 0.908

CC(C)(C)OC(=O)N1CCCN(C(=O)c2ccccc(-c3noc(CNCCN4CCCC4)n3)c2)CC1.O=C(Cl)Cc1cccc c1.c1ccncc1>>CC(C)(C)OC(=O)N1CCCN(C(=O)c2ccccc(-c3noc(CN(CCN4CCCCC4)C(=O)Cc4c cccc4)n3)c2)CC1

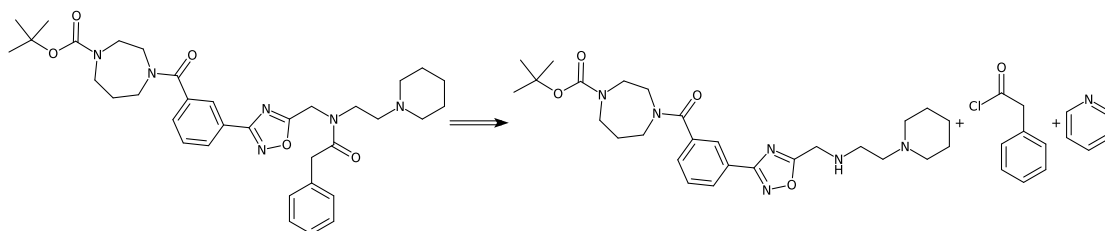

### Step 3

Type: Chloro N-alkylation, Confidence: 0.902

CC(C)(C)OC(=O)N1CCCN(C(=O)c2ccccc(-c3noc(CCl)n3)c2)CC1.CC#N.NCCN1CCCC1.O=C([O -])[O-].[K+].[K+]>>CC(C)(C)OC(=O)N1CCCN(C(=O)c2ccccc(-c3noc(CNCCN4CCCCC4)n3)c2)CC 1

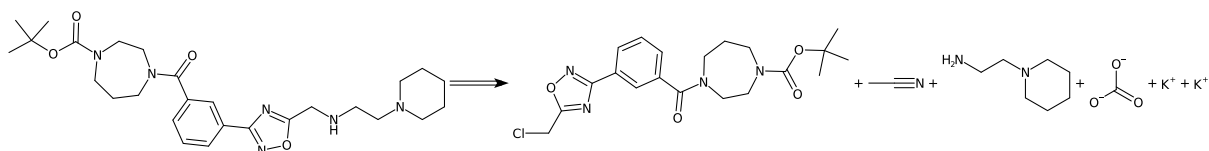

### Step 4

Type: 1,2,4-Oxadiazole synthesis, Confidence: 0.938

CC(C)(C)OC(=O)N1CCCN(C(=O)c2ccccc(C(=N)NO)c2)CC1.C1CCOC1.CCN(CC)CC.O=C(Cl)CCl >>CC(C)(C)OC(=O)N1CCCN(C(=O)c2ccccc(-c3noc(CCl)n3)c2)CC1

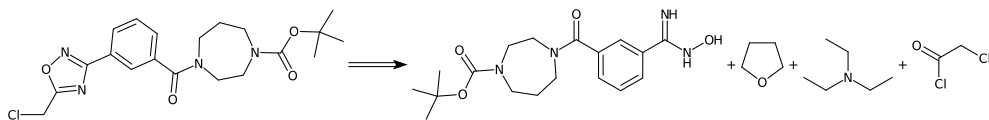

### Step 5

Type: Cyano to Hydroxyamidino, Confidence: 0.979

CC(C)(C)OC(=O)N1CCCN(C(=O)c2cccc(C#N)c2)CC1.CO.NO>>CC(C)(C)OC(=O)N1CCCN(C(=O)c2cccc(C=N)NO)c2)CC1

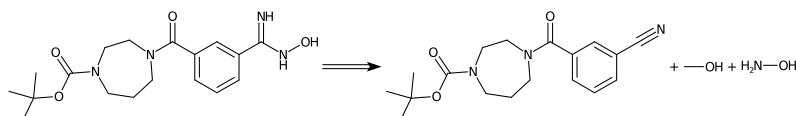

### Step 6

Type: Carboxylic acid + amine condensation, Confidence: 0.955

N#Cc1cccc(C(=O)O)c1.CC(C)(C)OC(=O)N1CCCNCC1.CCN(C(C)C)C(C)C.CN(C)C(On1nnc2cccnc21)=[N+](C)C.F[P-](F)(F)(F)F.F.ClCCl>>CC(C)(C)OC(=O)N1CCCN(C(=O)c2cccc(C#N)c2)CC1

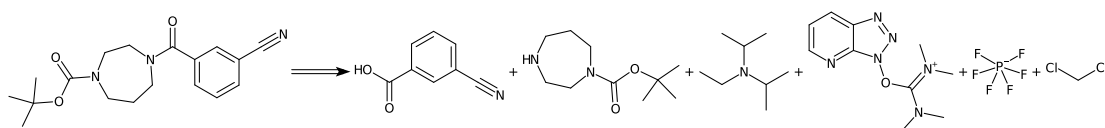

### Step 7

Type: Unrecognized, Confidence: 0.977

Cc1cccc(C#N)c1.O.O=[Mn](=O)(=O)[O-].[K+]>>N#Cc1cccc(C(=O)O)c1

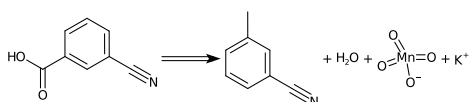

### Step 8

Type: Rosenmund van Braun cyanation, Confidence: 0.984

Cc1cccc(Br)c1.N#C[Cu]>>Cc1cccc(C#N)c1

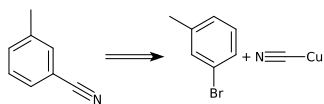

### Step 9

Type: Amino to bromo, Confidence: 0.997

***Br.Cc1cccc(N)c1.O=N[O-].[Na+].[Cu]Br.O=N[O-].[Na+]>>Cc1cccc(Br)c1***

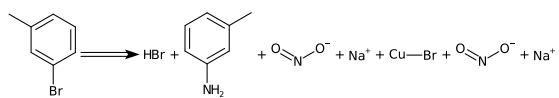



## Information about the retrosynthesis

Created On: 2019-09-26T17:09:14.562000

Model: MolecularTransformer\_v2.0\_R-Inchi-MolecularTransformer\_v2.0\_F

Product: C1N(C2N=C(N3CCOCC3)C=C(C3C(C(F)(F)F)=C4C(NC=C4)=NC=3)N=2)CCOC1

MSSR: 15

FAP: 0.75

MRP: 20

SbP: 2

Available smiles:

Exclude smiles: C1N(C2N=C(N3CCOCC3)C=C(C3C(C(F)(F)F)=C4C(NC=C4)=NC=3)N=2)CCOC1

Exclude substructures:

## Sequence 0, Confidence: 0.9

### Step 1

Type: Chloro Suzuki-type coupling, Confidence: 0.973

CC1(C)OB(c2cnc3[nH]ccc3c2C(F)(F)F)OC1(C)C.Clc1cc(N2CCOCC2)nc(N2CCOCC2)n1>>FC(F)(F)c1c(-c2cc(N3CCOCC3)nc(N3CCOCC3)n2)cnc2[nH]ccc12

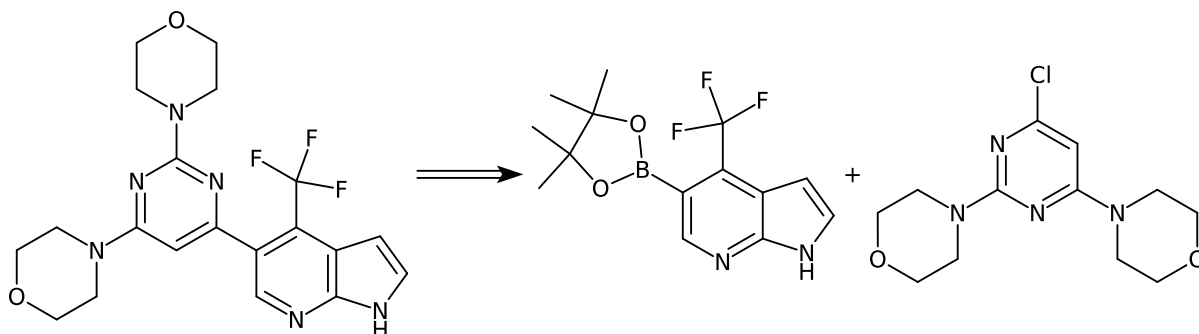

### Step 2

Type: Bromo Miyaura boration, Confidence: 0.926

CC1(C)OB(B2OC(C)(C)C(C)(C)O2)OC1(C)C.FC(F)(F)c1c(Br)cnc2[nH]ccc12>>CC1(C)OB(c2cnc3[nH]ccc3c2C(F)(F)F)OC1(C)C

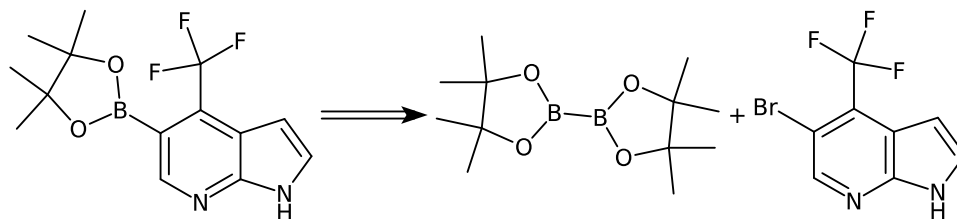



## Information about the retrosynthesis

Created On: 2019-10-01T13:20:26.992000

Model: MolecularTransformer\_v2.0\_R-Inchi-MolecularTransformer\_v2.0\_F

Product: FC(C1C2=C(NC=C2)N=CC=1C1N=C(N2CCOCC2)N=C(N2CCOCC2)C=1)(F)F

MSSR: 15

FAP: 0.7

MRP: 20

SbP: 2

Available smiles: C1=CC=CC=C1

Exclude smiles: FC(C1C2=C(NC=C2)N=CC=1C1N=C(N2CCOCC2)N=C(N2CCOCC2)C=1)(F)F

Exclude substructures:

## Sequence 0, Confidence: 0.467

Metadata:

Errors: No predictions above FAP. Reduce FAP, increase MRP or inspect siblings.

### Step 1

Type: Mesyl N-arylation, Confidence: 0.986

CS(=O)(=O)c1nc(-c2cnc3[nH]ccc3c2C(F)(F)F)cc(N2CCOCC2)n1.C1COCCN1>>FC(F)(F)c1c(-c2cc(N3CCOCC3)nc(N3CCOCC3)n2)cnc2[nH]ccc12

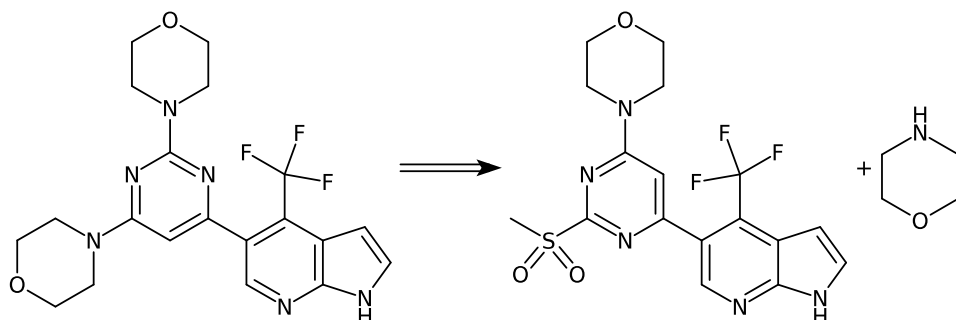

### Step 2

Type: Sulfanyl to sulfonyl, Confidence: 0.901

CSc1nc(-c2cnc3[nH]ccc3c2C(F)(F)F)cc(N2CCOCC2)n1.CO.O.O=S([O-])OO.[K+]>>CS(=O)(=O)c1nc(-c2cnc3[nH]ccc3c2C(F)(F)F)cc(N2CCOCC2)n1

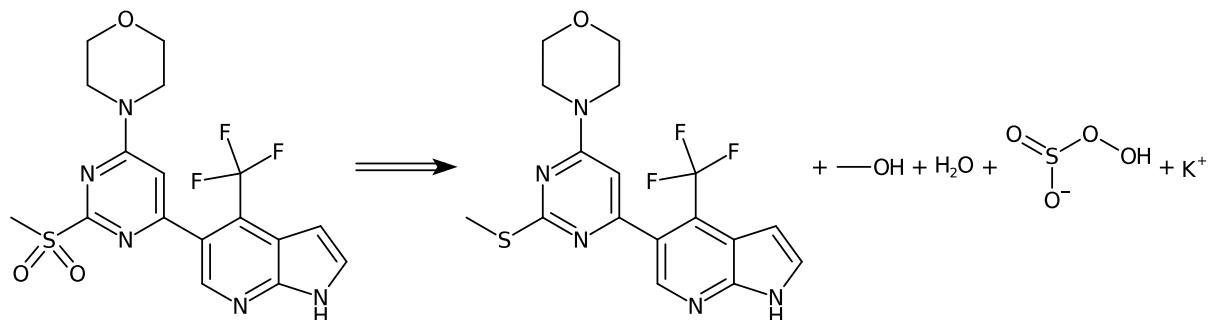

### Step 3

Type: Chloro Suzuki-type coupling, Confidence: 0.982

CSc1nc(Cl)cc(N2CCOCC2)n1.OB(O)c1cnc2[nH]ccc2c1C(F)(F)F>>CSc1nc(-c2cnc3[nH]ccc3c2C(F)(F)F)cc(N2CCOCC2)n1

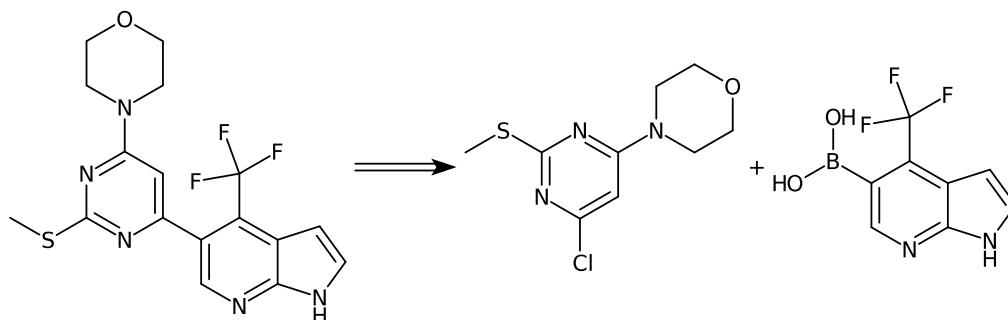

#### Step 4

Type: Chloro N-arylation, Confidence: 0.985

CSc1nc(Cl)cc(Cl)n1.C1COCCN1.O>>CSc1nc(Cl)cc(N2CCOCC2)n1

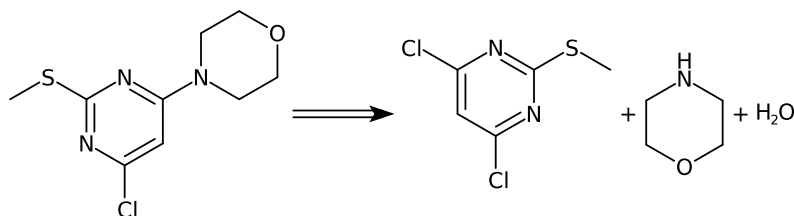

Type: Bromo to borono, Confidence: 0.941

FC(F)(F)c1c(Br)cnc2[nH]ccc12.CC(C)OB(OC(C)C)OC(C)C.[Li]CCCC>>OB(O)c1cnc2[nH]ccc2c1C(F)(F)F

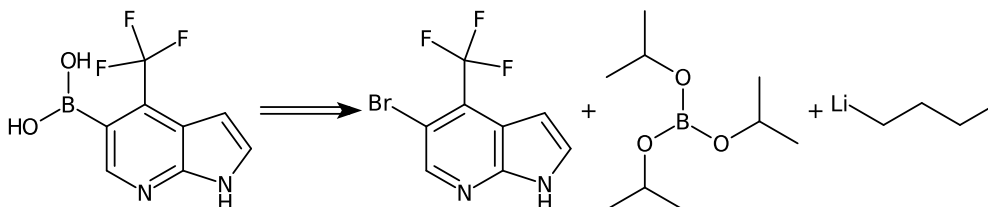

#### Step 5

Type: Hydroxy to chloro, Confidence: 0.983

CSc1nc(O)cc(O)n1.O=P(Cl)(Cl)Cl.[Na+].[OH-]>>CSc1nc(Cl)cc(Cl)n1

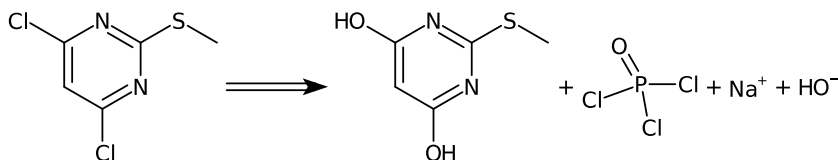

Type: Unrecognized, Confidence: 0.973



CC(C)[Si](C(C)C)(C(C)C)n1ccc2c(C(F)(F)F)c(Br)cnc21.CCCC[N+](CCCC)(CCCC)CCCC.[F-]>>F  
C(F)(F)c1c(Br)cnc2[nH]ccc12

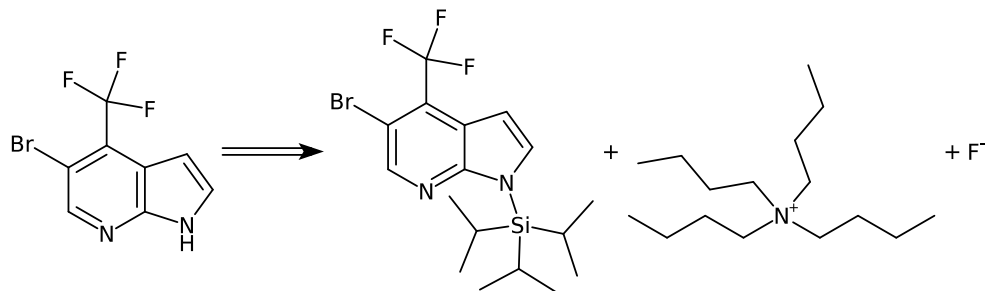

### Step 6

Type: Unrecognized, Confidence: 0.848

CSC(=N)N.CCO.CCOC(=O)CC(=O)OCC>>CSc1nc(O)cc(O)n1

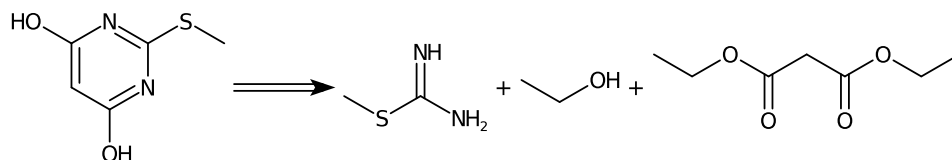

Type: Undefined, Confidence: 0.0

CC(C)[Si](C(C)C)(C(C)C)n1ccc2c(C(F)(F)F)c(Br)cnc21>>CC(C)[Si](C(C)C)(C(C)C)n1ccc2c(C(F)(F)F)c(Br)cnc21

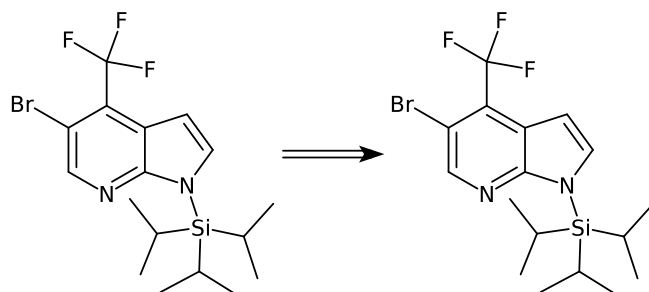

### Step 7

Type: S-methylation, Confidence: 0.712

Cl.NC(N)=S.O=C([O-])[O-].[K+].[K+].O=C([O-])[O-].[K+].[K+]>>CSC(=N)N

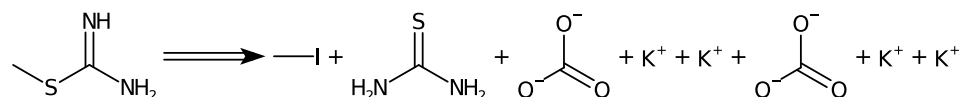



## Information about the retrosynthesis

Created On: 2019-10-01T19:46:55.746000

Model: MolecularTransformer\_v2.0\_R-Inchi-MolecularTransformer\_v2.0\_F

Product: FC(C1C2=C(NC=C2)N=CC=1C1N=C(N2CCOCC2)N=C(N2CCOCC2)C=1)(F)F

MSSR: 15

FAP: 0.6

MRP: 50

SbP: 3

Available smiles: C1=CC=CC=C1

Exclude smiles: FC(C1C2=C(NC=C2)N=CC=1C1N=C(N2CCOCC2)N=C(N2CCOCC2)C=1)(F)F

Exclude substructures:

## Sequence 0, Confidence: 0.181

### Step 1

Type: Chloro N-arylation, Confidence: 0.973

FC(F)(F)c1c(-c2cc(N3CCOCC3)nc(Cl)n2)cnc2[nH]ccc12.C1COCCN1>>FC(F)(F)c1c(-c2cc(N3CCOCC3)nc(N3CCOCC3)n2)cnc2[nH]ccc12

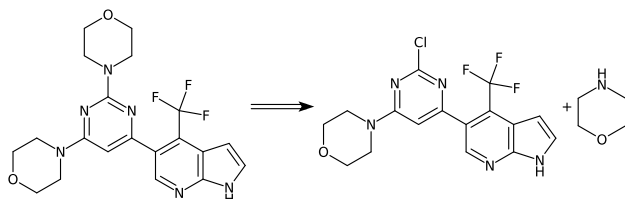

### Step 2

Type: Chloro N-arylation, Confidence: 0.852

FC(F)(F)c1c(-c2cc(Cl)nc(Cl)n2)cnc2[nH]ccc12.C1COCCN1.O>>FC(F)(F)c1c(-c2cc(N3CCOCC3)nc(Cl)n2)cnc2[nH]ccc12

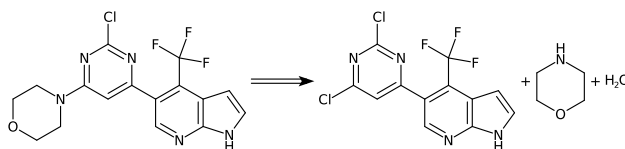

### Step 3

Type: Chloro Suzuki-type coupling, Confidence: 0.962

CC1(C)OB(c2cnc3[nH]ccc3c2C(F)(F)F)OC1(C)C.Clc1cc(Cl)nc(Cl)n1>>FC(F)(F)c1c(-c2cc(Cl)nc(Cl)n2)cnc2[nH]ccc12

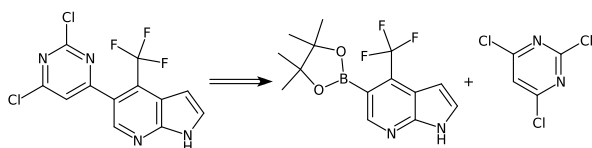

### Step 4

Type: Iodo Miyaura boration, Confidence: 0.857

FC(F)(F)c1c(I)cnc2[nH]ccc12.C1COCCO1.CC(=O)[O-].[K+].CC1(C)OB(B2OC(C)(C)C(C)(C)O2)OC1(C)C.Cl[Pd]Cl.[Fe+2].c1ccc(P(c2ccccc2)[c-]2ccccc2)cc1.c1ccc(P(c2ccccc2)[c-]2ccccc2)cc1>>CC1(C)OB(c2cnc3[nH]ccc3c2C(F)(F)F)OC1(C)C

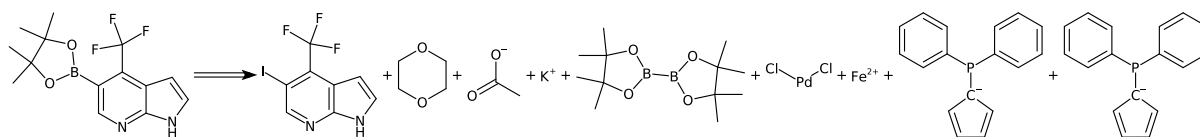

### Step 5

Type: Unrecognized, Confidence: 0.96

CC(C)[Si](C(C)C)(C(C)C)n1ccc2c(C(F)(F)F)c(I)cnc21.C1CCOC1.CCCC[N+](CCCC)(CCCC)CCC  
C.[F-]>>FC(F)(F)c1c(I)cnc2[nH]ccc12

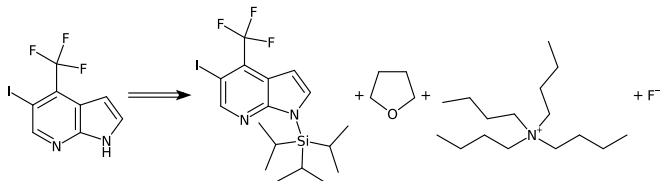

### Step 6

Type: Iodination, Confidence: 0.673

CC(C)[Si](C(C)C)(C(C)C)n1ccc2c(C(F)(F)F)ccnc21.C1CCOC1.CC(C)[N-]C(C)C.[Li+].I.[Cl-].[NH  
4+]>>CC(C)[Si](C(C)C)(C(C)C)n1ccc2c(C(F)(F)F)c(I)cnc21

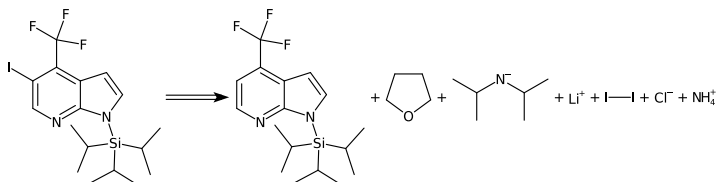

### Step 7

Type: Unrecognized, Confidence: 0.982

FC(F)(F)c1ccnc2[nH]ccc12.CC(C)[Si](Cl)(C(C)C)C(C)C.[NaH]>>CC(C)[Si](C(C)C)(C(C)C)n1ccc  
2c(C(F)(F)F)ccnc21

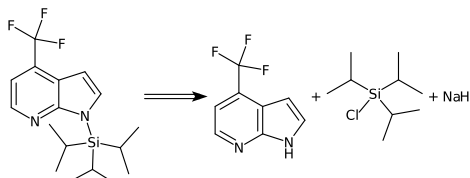

### Step 8

Type: Indole synthesis, Confidence: 0.736

C[Si](C)(C)C#Cc1c(C(F)(F)F)ccnc1N.CN(C)C=O.[Cu]I>>FC(F)(F)c1ccnc2[nH]ccc12

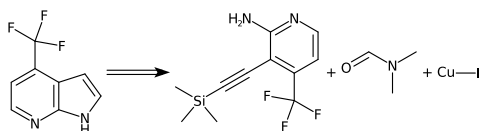

### Step 9

Type: Bromo Sonogashira coupling, Confidence: 0.933

Nc1cccc(C(F)(F)F)c1Br.C#C[Si](C)(C)C.CCN(CC)CC.Cl[Pd](Cl)([P](c1ccccc1)(c1ccccc1)c1ccc1)[P](c1ccccc1)(c1ccccc1)c1ccccc1.[Cu]I>>C[Si](C)(C)C#Cc1c(C(F)(F)F)ccnc1N

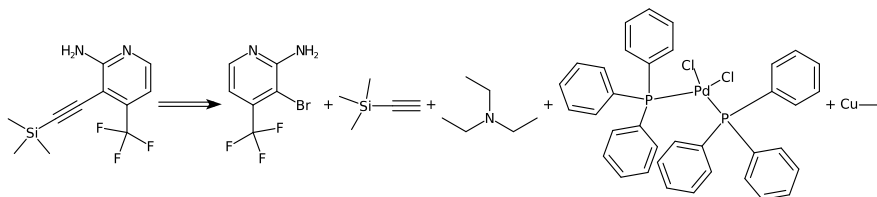

### Step 10

Type: Chloro to amino, Confidence: 0.916

FC(F)(F)c1ccnc(Cl)c1Br.N>>Nc1cccc(C(F)(F)F)c1Br

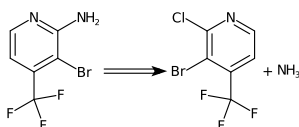

### Step 11

Type: Unrecognized, Confidence: 0.766

[O-][n+]1ccc(C(F)(F)F)c(Br)c1.O=P(Cl)(Cl)Cl>>FC(F)(F)c1ccnc(Cl)c1Br

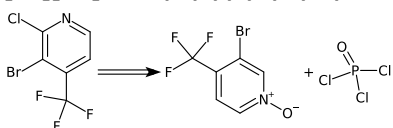

### Step 12

Type: Nitrogen oxidation, Confidence: 0.992

FC(F)(F)c1ccncc1Br.ClCCl.O=C(O)c1ccc(Cl)c1.[Na+].[OH-]>>[O-][n+]1ccc(C(F)(F)F)c(Br)c1

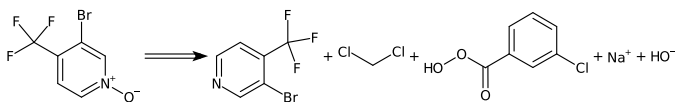

### Step 13

Type: Unrecognized, Confidence: 0.872

Brc1ccncc1.C1CCOC1.CC(C)[N-]C(C)C.[Li+].FC(F)(F)I.CC(C)[N-]C(C)C.[Li+]>>FC(F)(F)c1ccnc1Br

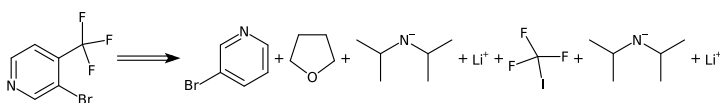



## Information about the retrosynthesis

Created On: 2019-09-26T17:09:25.559000

Model: MolecularTransformer\_v2.0\_R-Inchi-MolecularTransformer\_v2.0\_F

Product:

C1C(COC2C=CC3=C(CCCC3CC(N(CC3C=CC=CC=3)CC3CC(O)C(O)C3)=O)C=2)=CC=CC=1

MSSR: 15

FAP: 0.75

MRP: 20

SbP: 2

Available smiles:

Exclude smiles:

C1C(COC2C=CC3=C(CCCC3CC(N(CC3C=CC=CC=3)CC3CC(O)C(O)C3)=O)C=2)=CC=CC=1

Exclude substructures:

## Sequence 0, Confidence: 0.522

### Step 1

Type: Upjohn dihydroxylation, Confidence: 0.771

O=C(CC1CCCc2cc(OCc3ccccc3)ccc21)N(Cc1ccccc1)CC1CC=CC1.C[N+](=O)[O-].O=[Os](=O)(=O)=O>>O=C(CC1CCCc2cc(OCc3ccccc3)ccc21)N(Cc1ccccc1)CC1CC(O)C(O)C1

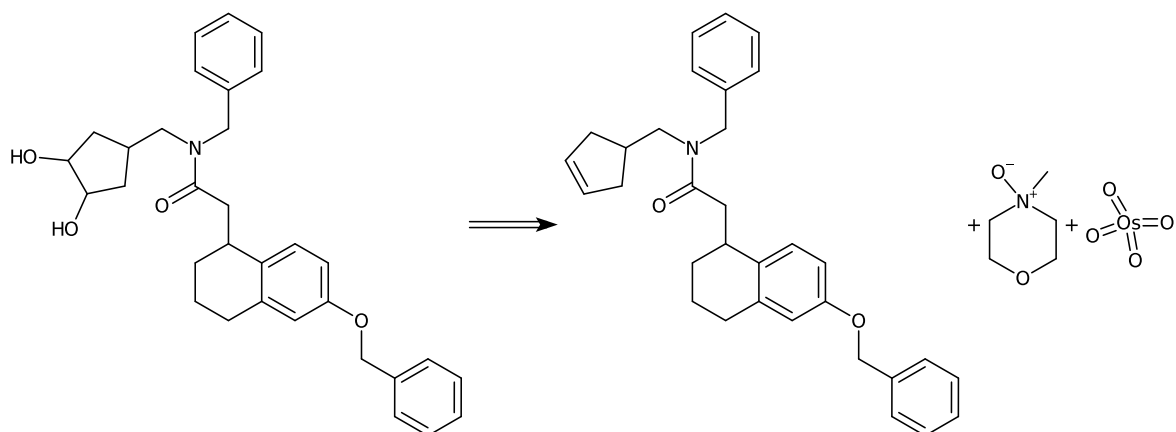

### Step 2

Type: Williamson ether synthesis, Confidence: 0.924

O=C(CC1CCCc2cc(O)ccc21)N(Cc1ccccc1)CC1CC=CC1.BrCc1ccccc1.CN(C)C=O.[H-].[Na+]>>O=C(CC1CCCc2cc(OCc3ccccc3)ccc21)N(Cc1ccccc1)CC1CC=CC1

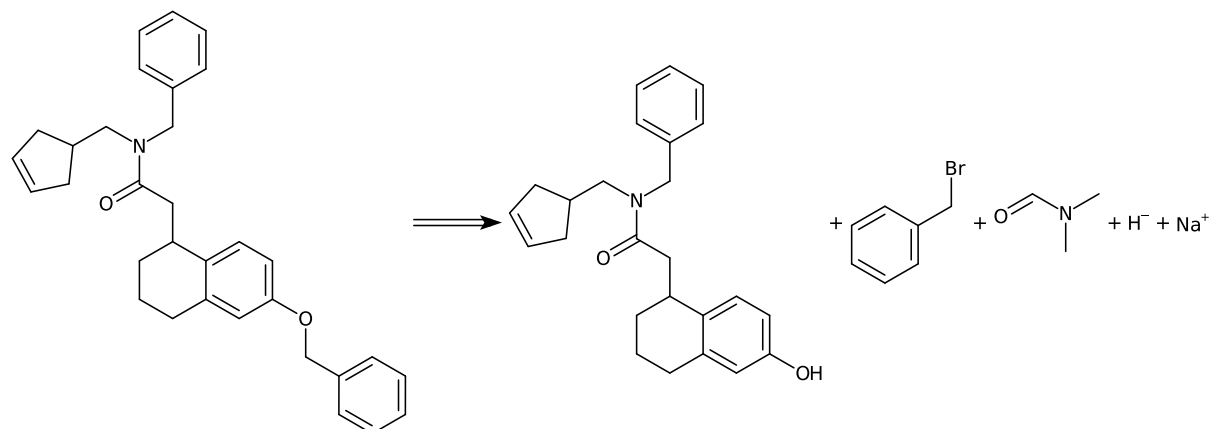

### Step 3

Type: Carboxylic acid + amine condensation, Confidence: 0.884

C1=CCC(NC(C)C)C1.O=C(O)CC1CCCc2cc(O)ccc21>>O=C(CC1CCCc2cc(O)ccc21)N(Cc1ccccc1)CC1CC=CC1

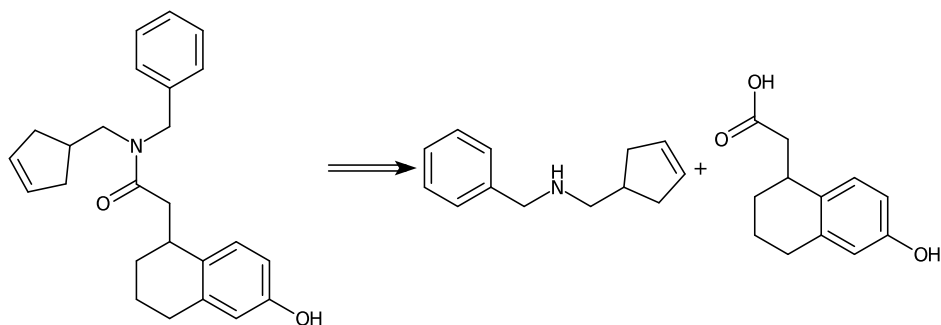

#### Step 4

Type: Aldehyde reductive amination, Confidence: 0.886

O=CC1CC=CC1.CC(=O)O[BH-](OC(C)=O)OC(C)=O.[Na+].ClCCl.NCc1ccccc1.O>>C1=CCC(CN Cc2ccccc2)C1

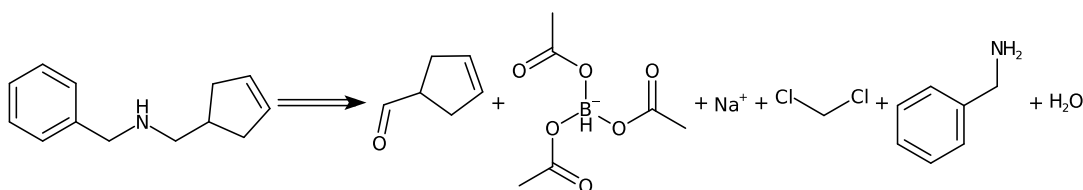

Type: Methoxy to hydroxy, Confidence: 0.958

Br.COc1ccc2c(c1)CCCC2CC(=O)O.O>>O=C(O)CC1CCCc2cc(O)ccc21

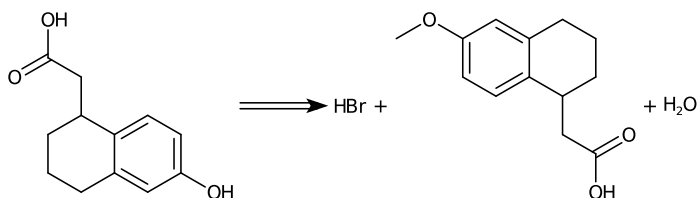

#### Step 5

Type: Aldehyde Collins oxidation, Confidence: 0.977

ClCCl.O=[Cr](=O)([O-])Cl.c1cc[nH+]cc1.OCC1CC=CC1.O=[Cr](=O)([O-])Cl.c1cc[nH+]cc1>>O=CC1CC=CC1

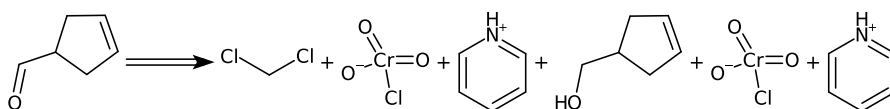





## Information about the retrosynthesis

Created On: 2019-10-01T13:35:23.042000

Model: MolecularTransformer\_v2.0\_R-Inchi-MolecularTransformer\_v2.0\_F

Product:

O=C(N(CC1CC(O)C(O)C1)CC1C=CC=CC=1)CC1C2C(=CC(=CC=2)OCC2C=CC=CC=2)CCC1

MSSR: 15

FAP: 0.75

MRP: 20

SbP: 2

Available smiles: C1=CC=CC=C1

Exclude smiles:

O=C(N(CC1CC(O)C(O)C1)CC1C=CC=CC=1)CC1C2C(=CC(=CC=2)OCC2C=CC=CC=2)CCC1

Exclude substructures:

## Sequence 0, Confidence: 0.267

Metadata:

Warnings: The retrosynthesis did not complete. Try increasing MSSR.

### Step 1

Type: Upjohn dihydroxylation, Confidence: 0.771

O=C(CC1CCCc2cc(OCc3ccccc3)ccc21)N(Cc1ccccc1)CC1CC=CC1.C[N+](=O)[O-].CCOCC1.O=[Os](=O)(=O)=O>>O=C(CC1CCCc2cc(OCc3ccccc3)ccc21)N(Cc1ccccc1)CC1CC(O)C(O)C1

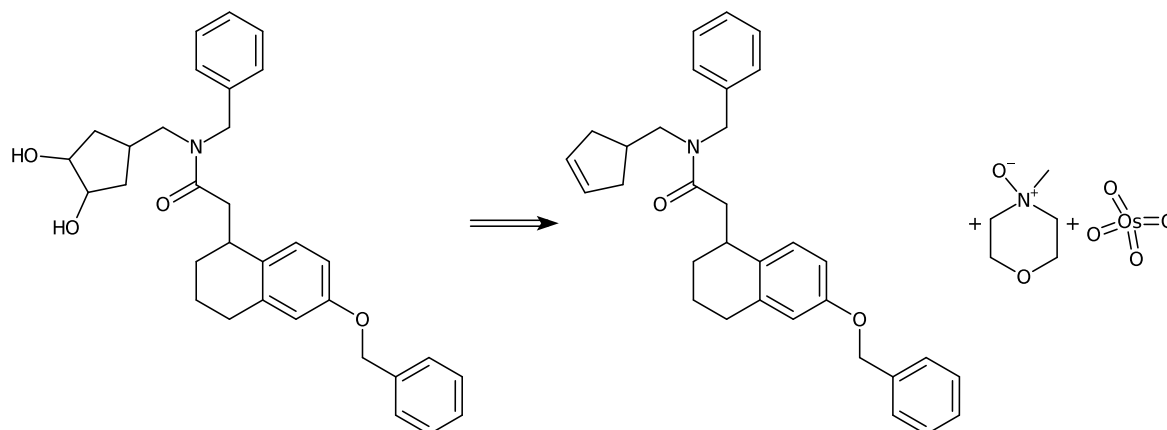

### Step 2

Type: Williamson ether synthesis, Confidence: 0.924

O=C(CC1CCCc2cc(O)ccc21)N(Cc1ccccc1)CC1CC=CC1.BrCc1ccccc1.CN(C)C=O.[H-].[Na+]>>O=C(CC1CCCc2cc(OCc3ccccc3)ccc21)N(Cc1ccccc1)CC1CC=CC1

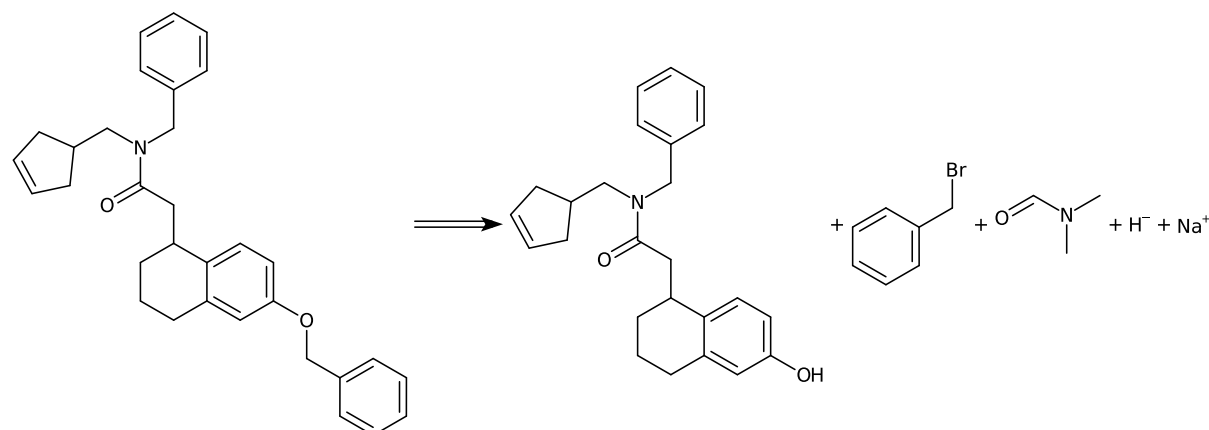

### Step 3

Type: Carboxylic acid + amine condensation, Confidence: 0.884

C1=CCC(CNCc2ccccc2)C1.O=C(O)CC1CCCc2cc(O)ccc21>>O=C(CC1CCCc2cc(O)ccc21)N(Cc1ccccc1)CC1CC=CC1

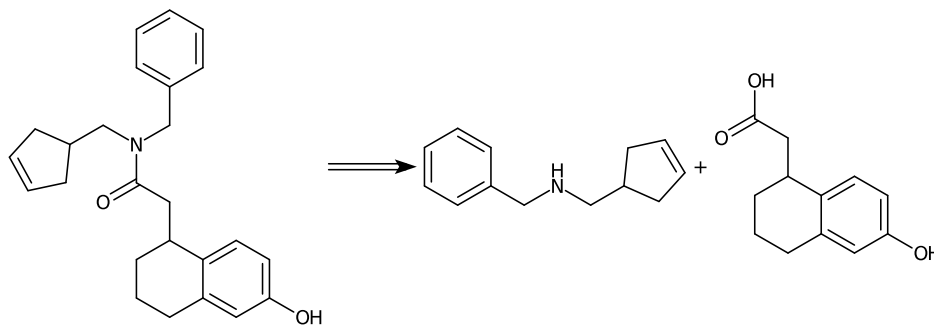

### Step 4

Type: Aldehyde reductive amination, Confidence: 0.886

O=CC1CC=CC1.CC(=O)O[BH-](OC(C)=O)OC(C)=O.[Na+].ClCCl.NCc1ccccc1.O>>C1=CCC(CNCc2ccccc2)C1

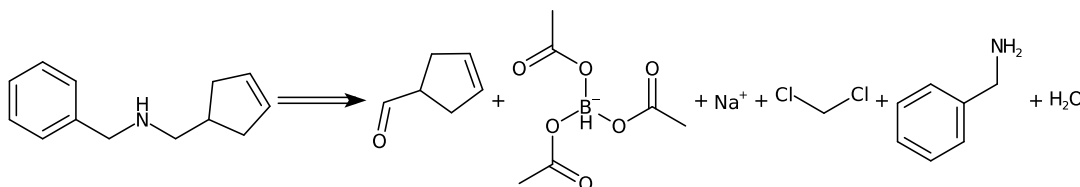

Type: Methoxy to hydroxy, Confidence: 0.958

COc1ccc2c(c1)CCCC2CC(=O)O.Br.O>>O=C(O)CC1CCCc2cc(O)ccc21

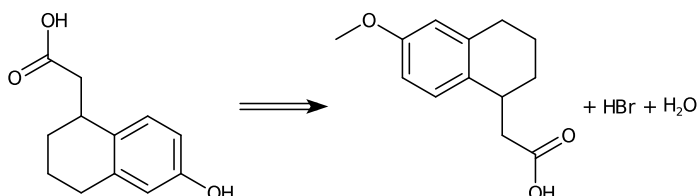

### Step 5

Type: Aldehyde Collins oxidation, Confidence: 0.977

OCC1CC=CC1.ClCCl.O=[Cr](=O)([O-])Cl.c1cc[nH+]cc1>>O=CC1CC=CC1

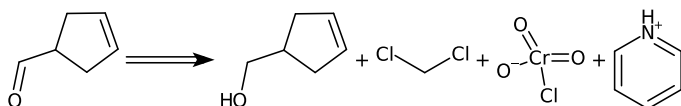

Type: CO<sub>2</sub>H-Me deprotection, Confidence: 0.985

COC(=O)CC1CCCc2cc(OC)ccc21.CO.Cl.[Na+].[OH-]>>COc1ccc2c(c1)CCCC2CC(=O)O

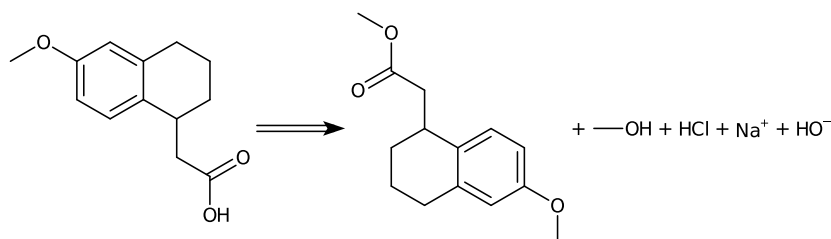

### Step 6

Type: Ester to alcohol reduction, Confidence: 0.982

CCOC(=O)C1CC=CC1.[Al+3].[H-].[H-].[H-].[H-].[Li+]>>OCC1CC=CC1

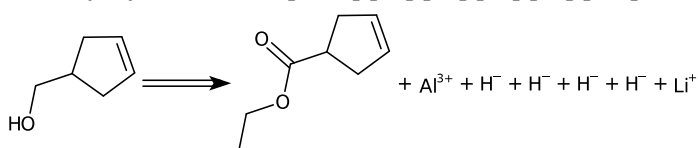

Type: Alkene hydrogenation, Confidence: 0.979

COC(=O)C=C1CCCc2cc(OC)ccc21.CO.[HH].[Pd]>>COC(=O)CC1CCCc2cc(OC)ccc21

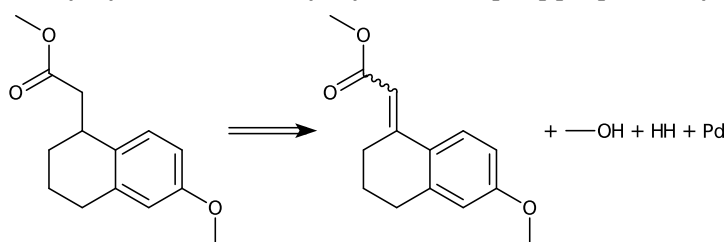

### Step 7

Type: Ethyl esterification, Confidence: 0.936

O=C([O-])C1CC=CC1.CCO.Cc1ccc(S(=O)(=O)O)cc1>>CCOC(=O)C1CC=CC1

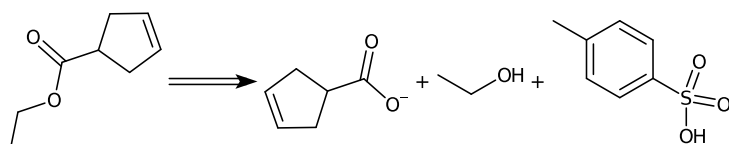

Type: Horner-Wadsworth-Emmons reaction, Confidence: 0.792

COc1ccc2c(c1)CCCC2=O.C1CCOC1.COC(=O)CP(=O)(OC)OC.[Li]CCCC>>COC(=O)C=C1CCCc2cc(OC)ccc21

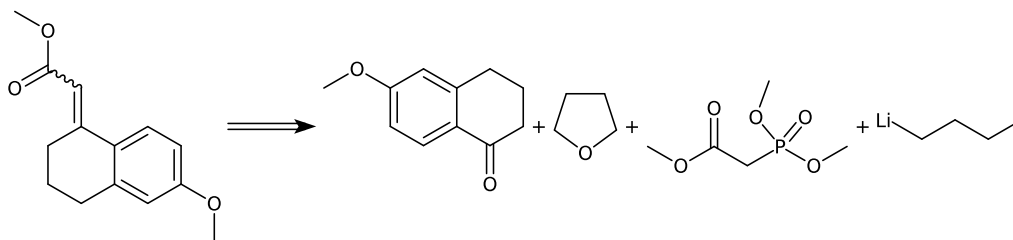

### Step 8

Type: Undefined, Confidence: 0.0

O=C([O-])C1CC=CC1>>O=C([O-])C1CC=CC1

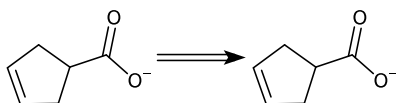

Type: Unrecognized, Confidence: 0.953

COc1cccc(CCCC(=O)O)c1.O=S(Cl)Cl.[Al+3].[Cl-].[Cl-].[Cl-]>>COc1ccc2c(c1)CCCC2=O

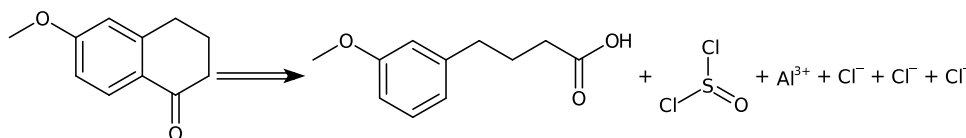

### Step 9

Type: CO<sub>2</sub>H-Me deprotection, Confidence: 0.981

COC(=O)CCCc1cccc(OC)c1.CO.[Na+].[OH-]>>COC1cccc(CCCC(=O)O)c1

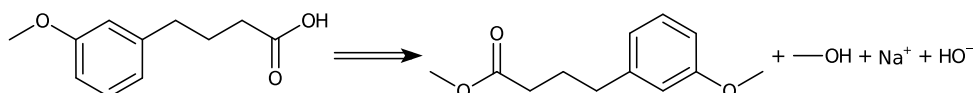

### Step 10

Type: Alkene hydrogenation, Confidence: 0.973

COC(=O)/C=C/Cc1cccc(OC)c1.CO.[HH].[Pd]>>COC(=O)CCCc1cccc(OC)c1

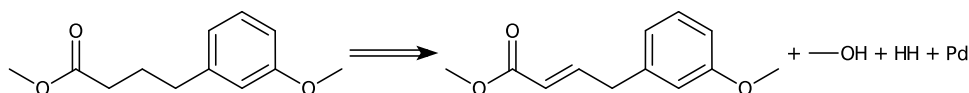

### Step 11

Type: Horner-Wadsworth-Emmons reaction, Confidence: 0.843

COc1cccc(CC=O)c1.COC(=O)CP(=O)(OC)OC.[NaH]>>COC(=O)/C=C/Cc1cccc(OC)c1

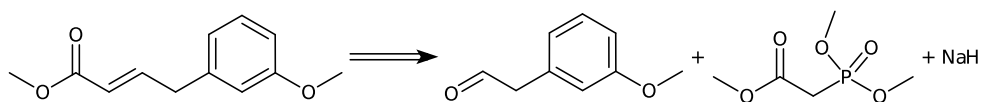

### Step 12

Type: Cyano to formyl, Confidence: 0.98

COc1cccc(CC#N)c1.CC(C)C[AlH]CC(C)C.ClCCl>>COc1cccc(CC=O)c1

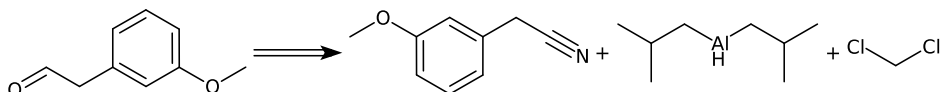

### Step 13

Type: Bromo Kolbe nitrile synthesis, Confidence: 0.988

COc1cccc(CBr)c1.[C-]#N.[Na+]>>COc1cccc(CC#N)c1

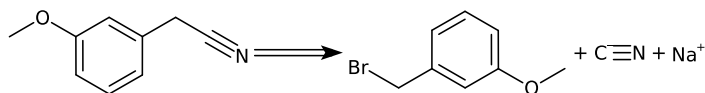

### Step 14

Type: Hydroxy to bromo, Confidence: 0.992

COc1cccc(CO)c1.BrP(Br)Br>>COc1cccc(CBr)c1

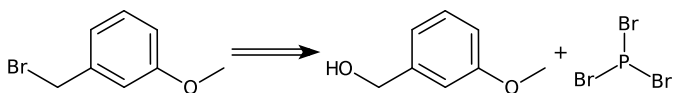

### Step 15

Type: Carboxylic acid to alcohol reduction, Confidence: 0.99

COc1cccc(C(=O)O)c1.B.C1CCOC1>>COc1cccc(CO)c1

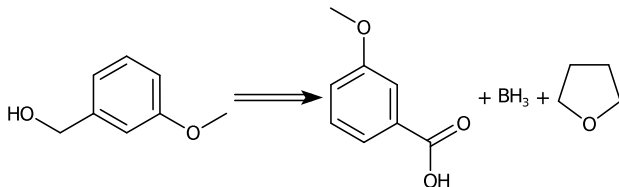



## Information about the retrosynthesis

Created On: 2019-10-01T19:53:53.373000

Model: MolecularTransformer\_v2.0\_R-Inchi-MolecularTransformer\_v2.0\_F

Product:

O=C(N(CC1CC(O)C(O)C1)CC1C=CC=CC=1)CC1C2C(=CC(=CC=2)OCC2C=CC=CC=2)CCC1

MSSR: 15

FAP: 0.6

MRP: 50

SbP: 3

Available smiles: C1=CC=CC=C1

Exclude smiles:

O=C(N(CC1CC(O)C(O)C1)CC1C=CC=CC=1)CC1C2C(=CC(=CC=2)OCC2C=CC=CC=2)CCC1

Exclude substructures:

## Sequence 0, Confidence: 0.267

Metadata:

Warnings: The retrosynthesis did not complete. Try increasing MSSR.

### Step 1

Type: *Unrecognized*, Confidence: 0.919

CC1(C)OC2CC(CN(Cc3ccccc3)C(=O)CC3CCCc4cc(OCc5ccccc5)ccc43)CC2O1.CO.Cl>>O=C(CC1CCCc2cc(OCc3ccccc3)ccc21)N(Cc1ccccc1)CC1CC(O)C(O)C1

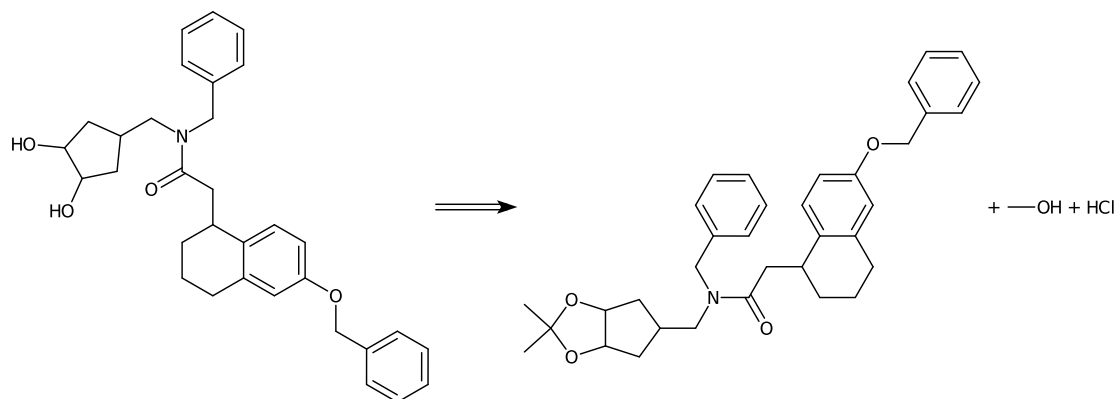

### Step 2

Type: *Amide Schotten-Baumann*, Confidence: 0.83

CC1(C)OC2CC(CNCc3ccccc3)CC2O1.O=C(Cl)CC1CCCc2cc(OCc3ccccc3)ccc21>>CC1(C)OC2CC(CN(Cc3ccccc3)C(=O)CC3CCCc4cc(OCc5ccccc5)ccc43)CC2O1

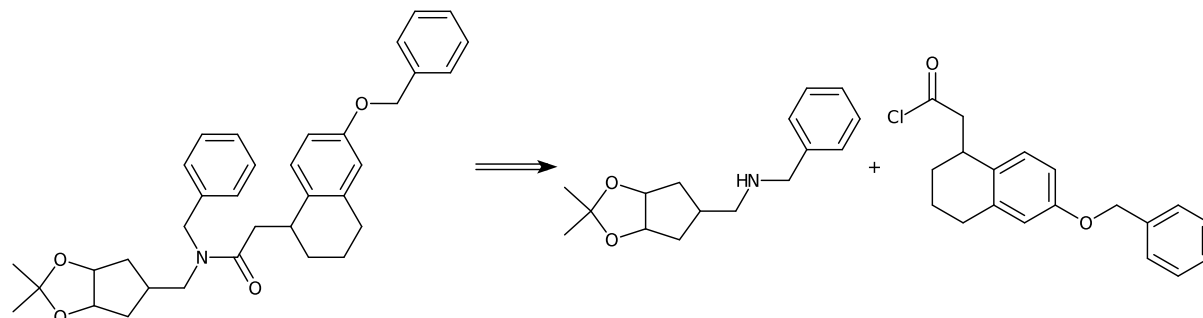

### Step 3

Type: *Tosyloxy N-alkylation*, Confidence: 0.877

Cc1ccc(S(=O)(=O)OCC2CC3OC(C)(C)OC3C2)cc1.NCc1ccccc1>>CC1(C)OC2CC(CNCc3ccccc3)CC2O1



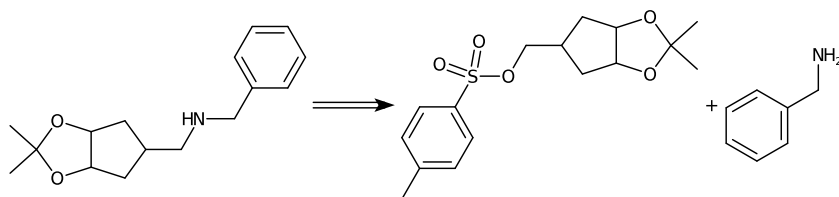

Type: Carboxylic acid to acid chloride, Confidence: 0.896

O=C(O)CC1CCCc2cc(OCc3ccccc3)ccc21.ClCCl.O=S(Cl)Cl>>O=C(Cl)CC1CCCc2cc(OCc3ccccc3)ccc21

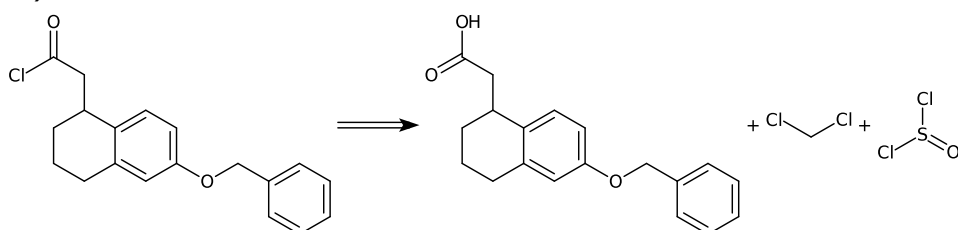

#### Step 4

Type: Sulfonic ester Schotten-Baumann, Confidence: 0.969

CC1(C)OC2CC(CO)CC2O1.Cc1ccc(S(=O)(=O)Cl)cc1>>Cc1ccc(S(=O)(=O)OCC2CC3OC(C)(C)OC3C2)cc1

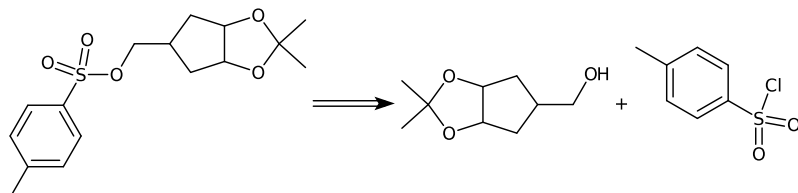

Type: CO<sub>2</sub>H-Et deprotection, Confidence: 0.984

CCOC(=O)CC1CCCc2cc(OCc3ccccc3)ccc21.CO.O.[Na+].[OH-]>>O=C(O)CC1CCCc2cc(OCc3ccccc3)ccc21

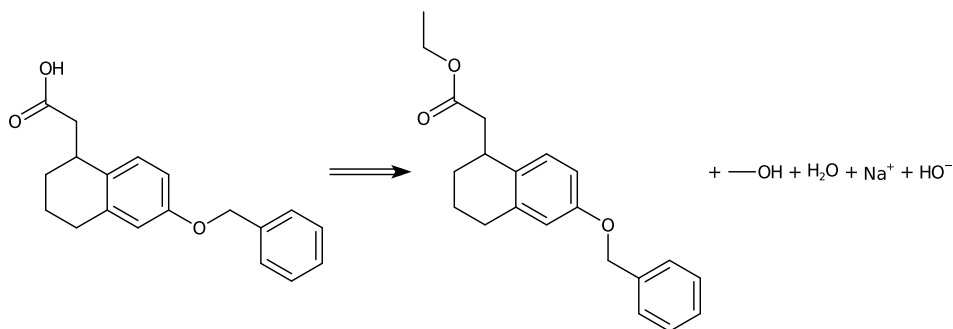

#### Step 5

Type: Ester to alcohol reduction, Confidence: 0.931

COC(=O)C1CC2OC(C)(C)OC2C1.[AlH4-].[Li+]>>CC1(C)OC2CC(CO)CC2O1

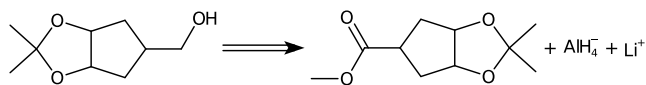

Type: Williamson ether synthesis, Confidence: 0.948

CCOC(=O)CC1CCCc2cc(O)ccc21.BrCc1cccc1.CN(C)C=O.O=C([O-])[O-].[Cs+].[Cs+]>>CCOC(=O)CC1CCCc2cc(OCc3ccccc3)ccc21

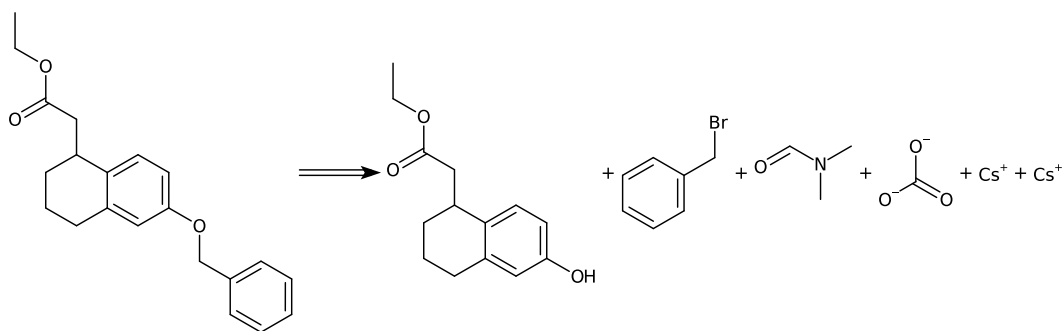

## Step 6

Type: Methyl esterification, Confidence: 0.97

CC1(C)OC2CC(C(=O)O)CC2O1.Cl.CN(C)C=O.O=C([O-])[O-].[K+].[K+]>>COC(=O)C1CC2OC(C)(C)OC2C1

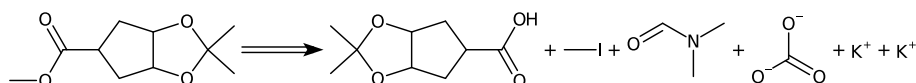

Type: Fischer-Speier esterification, Confidence: 0.987

O=C(O)CC1CCCc2cc(O)ccc21.CCO.O=S(=O)(O)O>>CCOC(=O)CC1CCCc2cc(O)ccc21

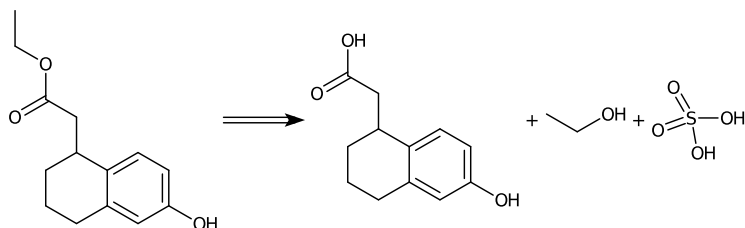

## Step 7

Type: CO2H-Et deprotection, Confidence: 0.915

CCOC(=O)C1CC2OC(C)(C)OC2C1.CO.[Na+].[OH-]>>CC1(C)OC2CC(C(=O)O)CC2O1

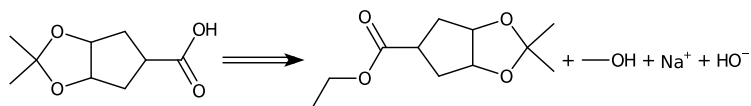

**Type: Methoxy to hydroxy, Confidence: 0.958**

COc1ccc2c(c1)CCCC2CC(=O)O.Br.O>>O=C(O)CC1CCCc2cc(O)ccc21

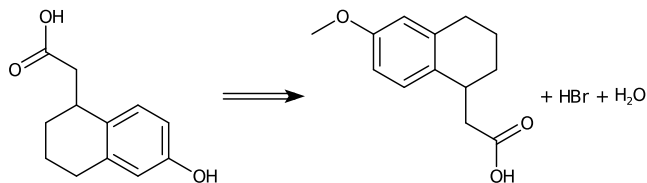

### Step 8

**Type: Unrecognized, Confidence: 0.893**

CCOC(=O)C1CC(O)C(O)C1.COC(C)(C)OC.Cc1ccc(S(=O)(=O)O)cc1.Cc1ccccc1>>CCOC(=O)C1CC2OC(C)C2C1

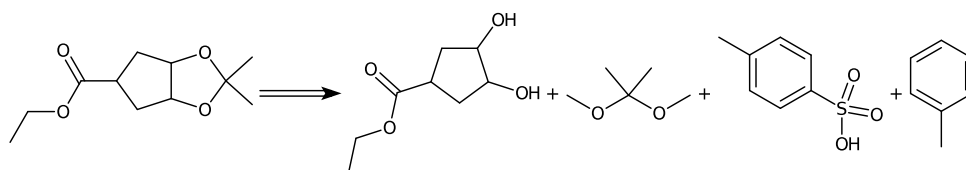

**Type: Alkene hydrogenation, Confidence: 0.948**

COc1ccc2c(c1)CCC=C2CC(=O)O.[HH].[Pd]>>COc1ccc2c(c1)CCCC2CC(=O)O

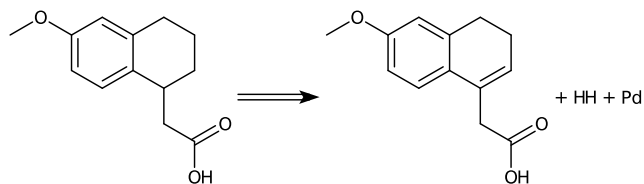

### Step 9

**Type: Milas hydroxylation, Confidence: 0.963**

CCOC(=O)C1CC=CC1.O=[Os](=O)(=O)=O>>CCOC(=O)C1CC(O)C(O)C1

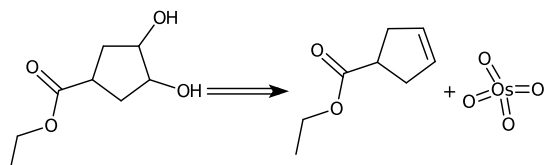

Type: CO<sub>2</sub>H-Me deprotection, Confidence: 0.974

COC(=O)CC1=CCc2cc(OC)ccc21.CO.[Na+].[OH-]>>COc1ccc2c(c1)CCC=C2CC(=O)O

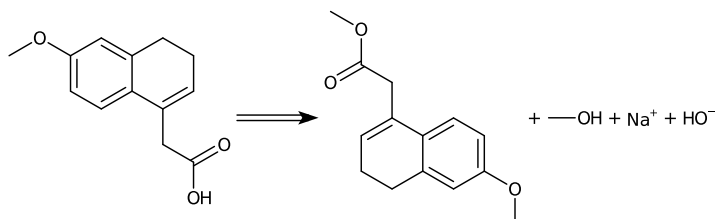

### Step 10

Type: Fischer-Speier esterification, Confidence: 0.991

O=C(O)C1CC=CC1.CCO.O=S(=O)(O)O>>CCOC(=O)C1CC=CC1

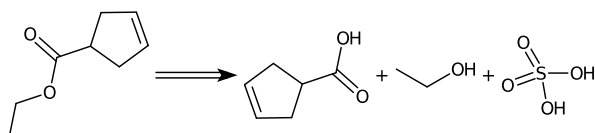

Type: Undefined, Confidence: 0.0

COC(=O)CC1=CCc2cc(OC)ccc21>>COC(=O)CC1=CCc2cc(OC)ccc21

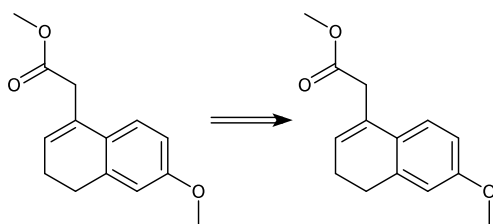

### Step 11

Type: CO<sub>2</sub>H-Me deprotection, Confidence: 0.966

COC(=O)C1CC=CC1.C1CCOC1.O.[Li+].[OH-]>>O=C(O)C1CC=CC1

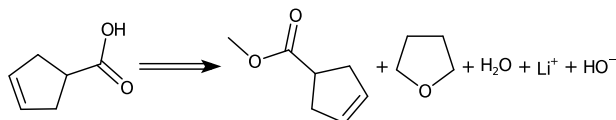

### Step 12

Type: Olefin metathesis, Confidence: 0.931

C=CCC(CC=C)C(=O)OC.C1CC1>>COC(=O)C1CC=CC1

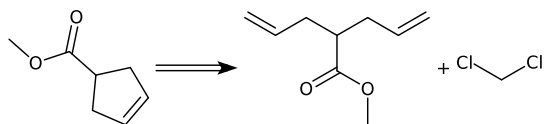

### Step 13

Type: Unrecognized, Confidence: 0.915

C=CCCC(=O)OC.C1CCOC1.C=CCBr.CC(C)NC(C)C.[Li]CCCC>>C=CCC(CC=C)C(=O)OC

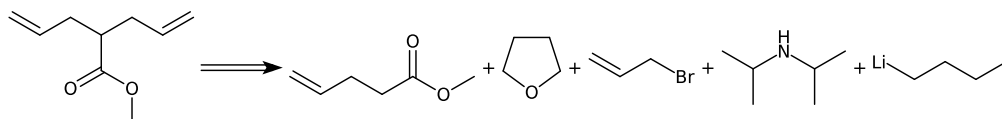

### Step 14

Type: Methyl esterification, Confidence: 0.995

C=CCCC(=O)O.CO.C[Si](C)(C)C=[N+]=[N-].ClCCl>>C=CCCC(=O)OC

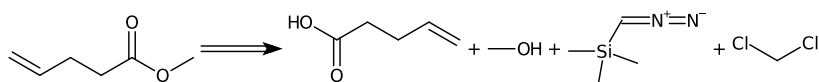

### Step 15

Type: CO<sub>2</sub>H-Et deprotection, Confidence: 0.98

C=CCCC(=O)OCC.C1CCOC1.O.[Li]O>>C=CCCC(=O)O

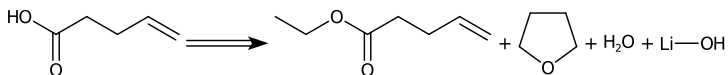



## Information about the retrosynthesis

Created On: 2019-09-26T17:09:37.740000

Model: MolecularTransformer\_v2.0\_R-Inchi-MolecularTransformer\_v2.0\_F

Product: C1C2(C(CCC3C2CCC2(C3CC(C2(O)C(C(CCC(COC(C)=O)C)=O)C)OS(=O)(=O)C)C)CC(OC(C)=O)C1)C

MSSR: 15

FAP: 0.75

MRP: 20

SbP: 2

Available smiles:

Exclude smiles: C1C2(C(CCC3C2CCC2(C3CC(C2(O)C(C(CCC(COC(C)=O)C)=O)C)OS(=O)(=O)C)C)CC(OC(C)=O)C1)C

Exclude substructures:

## Sequence 0, Confidence: 0.734

Metadata:

Warnings: 'ERROR MESSAGE'

### Step 1

Type: Unrecognized, Confidence: 0.734

```
CC(CO)CCC(=O)C(C)C1(O)C(OS(C)(=O)=O)CC2C3CCC4CC(O)CCC4(C)C3CCC21C.CC(=O)OC(C)=O.c1ccncc1>>CC(=O)OCC(C)CCC(=O)C(C)C1(O)C(OS(C)(=O)=O)CC2C3CCC4CC(OC(C)=O)CCC4(C)C3CCC21C
```

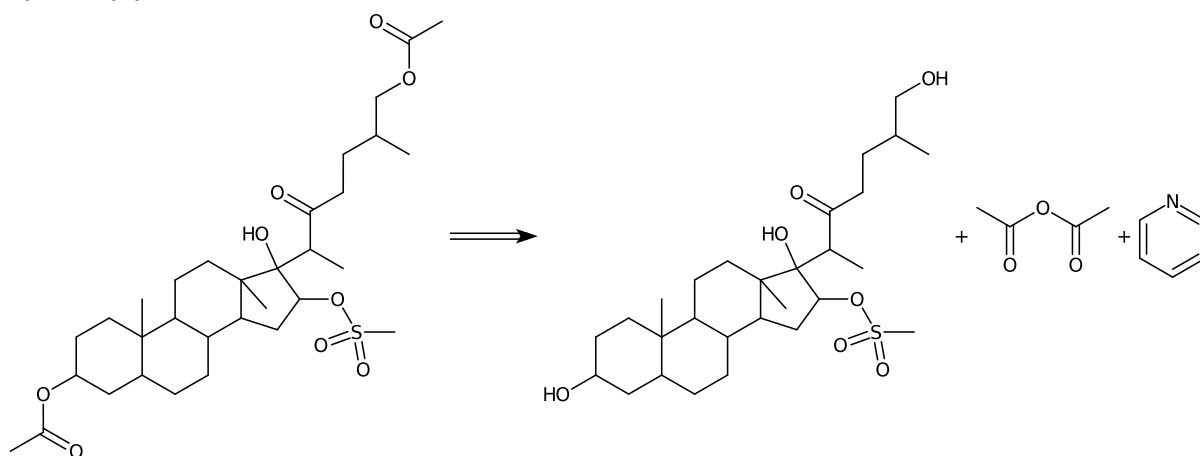

### Step 2

Type: Undefined, Confidence: 0.0

```
CC(CO)CCC(=O)C(C)C1(O)C(OS(C)(=O)=O)CC2C3CCC4CC(O)CCC4(C)C3CCC21C>>CC(CO)CCC(=O)C(C)C1(O)C(OS(C)(=O)=O)CC2C3CCC4CC(O)CCC4(C)C3CCC21C
```

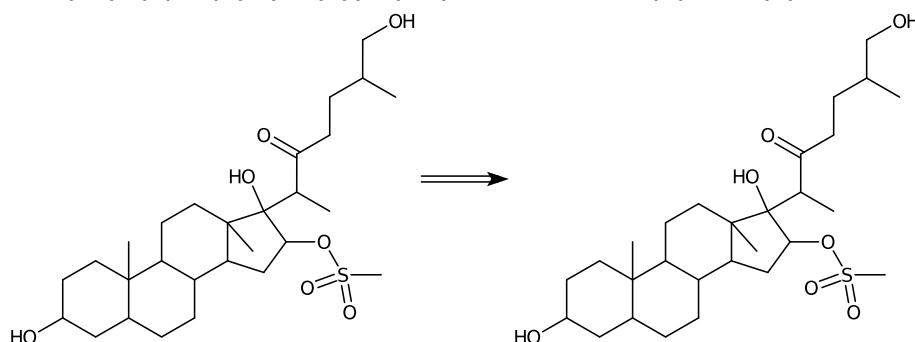



## Information about the retrosynthesis

Created On: 2019-10-01T13:32:30.614000

Model: MolecularTransformer\_v2.0\_R-Inchi-MolecularTransformer\_v2.0\_F

Product: CC(OCC(CCC(C(C1(C2(C(C3C(CC2)C2(C(CC(CC2)OC(=O)C)CC3)C)CC1OS(=O)(=O)C)C)O)C)=O)C)=O

MSSR: 15

FAP: 0.6

MRP: 50

SbP: 3

Available smiles:

Exclude smiles: CC(OCC(CCC(C(C1(C2(C(C3C(CC2)C2(C(CC(CC2)OC(=O)C)CC3)C)CC1OS(=O)(=O)C)C)O)C)=O)C)=O

Exclude substructures:



## Sequence 0, Confidence: 0.734

Metadata:

Errors: No predictions above FAP. Reduce FAP, increase MRP or inspect siblings.

### Step 1

Type: Unrecognized, Confidence: 0.734

```
CC(CO)CCC(=O)C(C)C1(O)C(OS(C)(=O)=O)CC2C3CCC4CC(O)CCC4(C)C3CCC21C.CC(=O)OC(C)=O.c1ccncc1>>CC(=O)OCC(C)CCC(=O)C(C)C1(O)C(OS(C)(=O)=O)CC2C3CCC4CC(OC(C)=O)CCC4(C)C3CCC21C
```



### Step 2

Type: Undefined, Confidence: 0.0

```
CC(CO)CCC(=O)C(C)C1(O)C(OS(C)(=O)=O)CC2C3CCC4CC(O)CCC4(C)C3CCC21C>>CC(CO)CCC(=O)C(C)C1(O)C(OS(C)(=O)=O)CC2C3CCC4CC(O)CCC4(C)C3CCC21C
```





## Information about the retrosynthesis

Created On: 2019-10-01T19:56:40.172000

Model: MolecularTransformer\_v2.0\_R-Inchi-MolecularTransformer\_v2.0\_F

Product: CC(OCC(CCC(C(C1(C2(C(C3C(CC2)C2(C(CC(CC2)OC(=O)C)CC3)C)CC1OS(=O)(=O)C)C)O)C)=O)C)=O

MSSR: 15

FAP: 0.6

MRP: 50

SbP: 3

Available smiles: C(=O)1C2(C(C3C(CC2)C2(C(CC(CC2)OC(=O)C)CC3)C)CC1)C

Exclude smiles: CC(OCC(CCC(C(C1(C2(C(C3C(CC2)C2(C(CC(CC2)OC(=O)C)CC3)C)CC1OS(=O)(=O)C)C)O)C)=O)C)=O

Exclude substructures:

## Sequence 0, Confidence: 0.734

Metadata:

Errors: No predictions above FAP. Reduce FAP, increase MRP or inspect siblings.

### Step 1

Type: Unrecognized, Confidence: 0.734

```
CC(CO)CCC(=O)C(C)C1(O)C(OS(C)(=O)=O)CC2C3CCC4CC(O)CCC4(C)C3CCC21C.CC(=O)OC(C)=O.c1ccncc1>>CC(=O)OCC(C)CCC(=O)C(C)C1(O)C(OS(C)(=O)=O)CC2C3CCC4CC(OC(C)=O)CCC4(C)C3CCC21C
```



### Step 2

Type: Undefined, Confidence: 0.0

```
CC(CO)CCC(=O)C(C)C1(O)C(OS(C)(=O)=O)CC2C3CCC4CC(O)CCC4(C)C3CCC21C>>CC(CO)CCC(=O)C(C)C1(O)C(OS(C)(=O)=O)CC2C3CCC4CC(O)CCC4(C)C3CCC21C
```





## Information about the retrosynthesis

Created On: 2019-09-26T17:09:48.283000

Model: MolecularTransformer\_v2.0\_R-Inchi-MolecularTransformer\_v2.0\_F

Product: COC1C=CC(CN2C3C(=CC=CC=3C3N(CC4C(OC)=CC(OC)=CC=4)C(C4C5CCN(CC5)C4)ON=3)OCC2)=CC=1

MSSR: 15

FAP: 0.75

MRP: 20

SbP: 2

Available smiles:

Exclude smiles: COC1C=CC(CN2C3C(=CC=CC=3C3N(CC4C(OC)=CC(OC)=CC=4)C(C4C5CCN(CC5)C4)ON=3)OCC2)=CC=1

Exclude substructures:

## Sequence 0, Confidence: 0.13

Metadata:

Warnings: 'ERROR MESSAGE'

### Step 1

Type: Mitsunobu aryl ether synthesis, Confidence: 0.427

COc1ccc(CN(CCO)c2c(O)cccc2C2=NOC(C3CN4CCC3CC4)N2Cc2ccc(OC)cc2OC)cc1>>COc1ccc(CN2CCOc3cccc(C4=NOC(C5CN6CCC5CC6)N4Cc4ccc(OC)cc4OC)c32)cc1

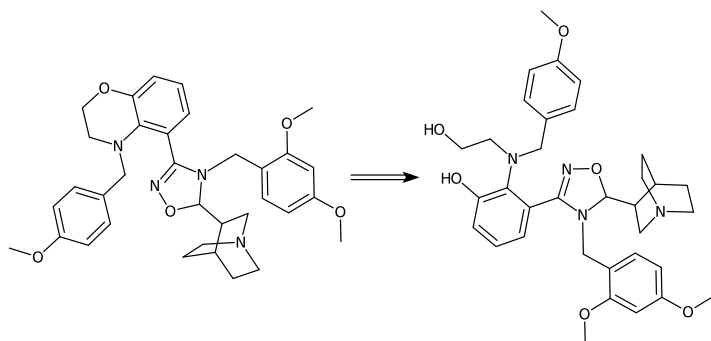

### Step 2

Type: O-TBS deprotection, Confidence: 0.86

COc1ccc(CN(CCO[Si](C)(C)C(C)(C)C)c2c(O)cccc2C2=NOC(C3CN4CCC3CC4)N2Cc2ccc(OC)c2OC)cc1.C1CCOC1.CCCC[N+](CCCC)(CCCC)CCCC.[F-]>>COc1ccc(CN(CCO)c2c(O)cccc2C2=NOC(C3CN4CCC3CC4)N2Cc2ccc(OC)cc2OC)cc1

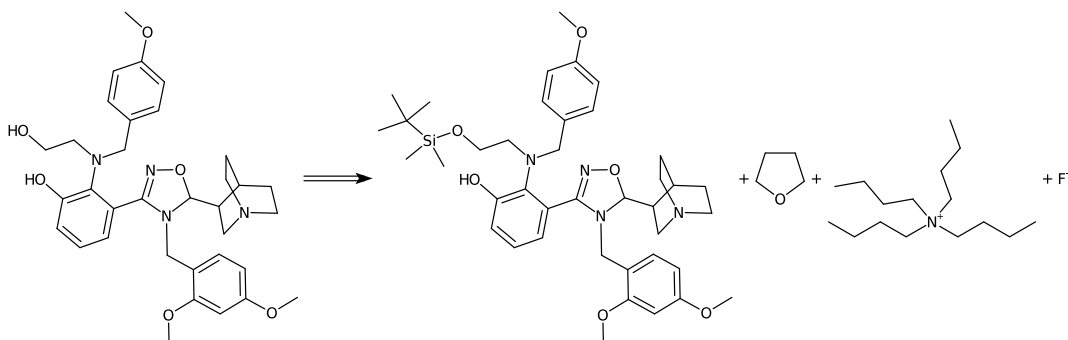

### Step 3

Type: O-Bn deprotection, Confidence: 0.65

COc1ccc(CN(CCO[Si](C)(C)C(C)(C)C)c2c(OCc3ccccc3)cccc2C2=NOC(C3CN4CCC3CC4)N2Cc2ccc(OC)cc2OC)cc1.C1CCOC1.[Pd]>>COc1ccc(CN(CCO[Si](C)(C)C(C)(C)C)c2c(O)cccc2C2=NOC(C3CN4CCC3CC4)N2Cc2ccc(OC)cc2OC)cc1

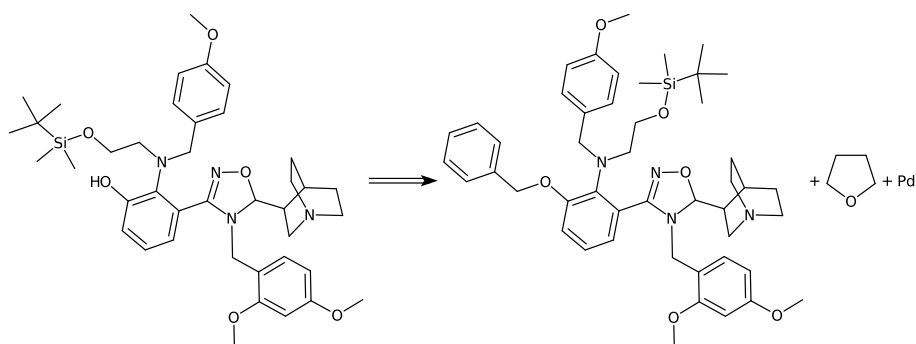

### Step 4

Type: Bromo N-alkylation, Confidence: 0.807

COc1ccc(CNc2c(OCc3ccccc3)cccc2C2=NOC(C3CN4CCC3CC4)N2Cc2ccc(OC)cc2OC)cc1.CC(C)(C)[Si](C)(C)OCCBr.CN(C)C=O.[H-].[Na+]>>COc1ccc(CN(CCO[Si](C)(C)(C)(C)c2c(OCc3ccccc3)cccc2C2=NOC(C3CN4CCC3CC4)N2Cc2ccc(OC)cc2OC)cc1

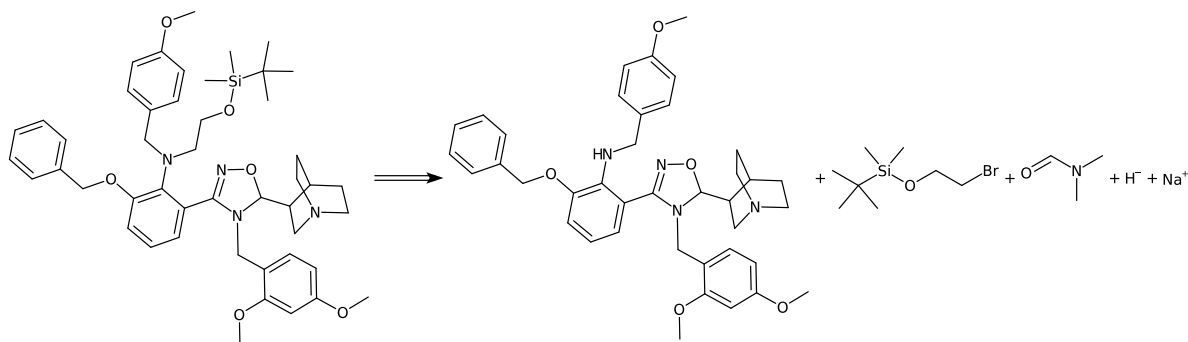

### Step 5

Type: Aldehyde reductive amination, Confidence: 0.724

COc1ccc(CN2C(c3ccccc3)ccc2C2=NOC(C3CN4CCC3CC4)N2Cc2ccc(OC)cc2OC)c1.CC(=O)O[BH-](OC(C)=O)OC(C)=O.[Na+].COc1ccc(C=O)cc1.ClCCl>>COc1ccc(CNc2c(OCc3ccccc3)cccc2C2=NOC(C3CN4CCC3CC4)N2Cc2ccc(OC)cc2OC)cc1

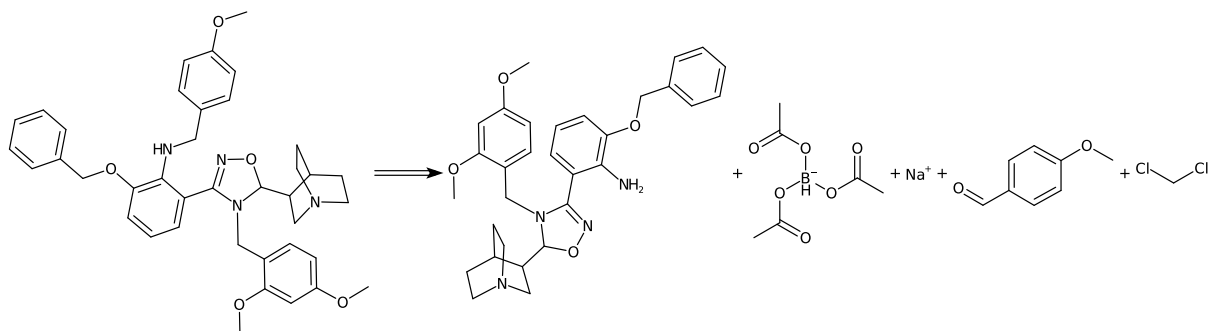

### Step 6

Type: Nitro to amino, Confidence: 0.934

COc1ccc(CN2C(c3cccc(OCc4ccccc4)c3[N+](=O)[O-])=NOC2C2CN3CCC2CC3)c(OC)c1.CCO.C  
Cl[Sn](Cl)O.O>>COc1ccc(CN2C(c3cccc(OCc4ccccc4)c3N)=NOC2C2CN3CCC2CC3)c(OC)c1

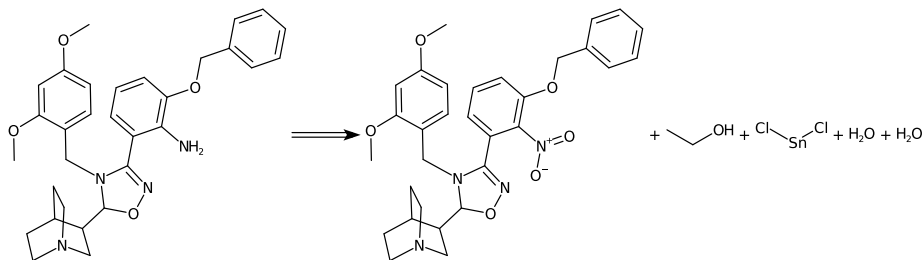

## Step 7

Type: Undefined, Confidence: 0.0

COc1ccc(CN2C(c3cccc(OCc4ccccc4)c3[N+](=O)[O-])=NOC2C2CN3CCC2CC3)c(OC)c1>>COc  
1ccc(CN2C(c3cccc(OCc4ccccc4)c3[N+](=O)[O-])=NOC2C2CN3CCC2CC3)c(OC)c1

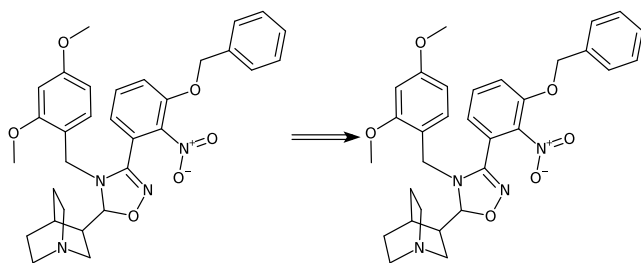



## Information about the retrosynthesis

Created On: 2019-10-01T13:59:59.566000

Model: MolecularTransformer\_v2.0\_R-Inchi-MolecularTransformer\_v2.0\_F

Product: COC1C=CC(CN2C3C(=CC=CC=3C3N(CC4C(OC)=CC(OC)=CC=4)C(C4C5CCN(CC5)C4)ON=3)OCC2)=CC=1

MSSR: 15

FAP: 0.6

MRP: 50

SbP: 3

Available smiles:

Exclude smiles: COC1C=CC(CN2C3C(=CC=CC=3C3N(CC4C(OC)=CC(OC)=CC=4)C(C4C5CCN(CC5)C4)ON=3)OCC2)=CC=1

Exclude substructures:



## Sequence 0, Confidence: 0.13

Metadata:

Errors: No predictions above FAP. Reduce FAP, increase MRP or inspect siblings.

### Step 1

Type: Mitsunobu aryl ether synthesis, Confidence: 0.427

COc1ccc(CN(CCO)c2c(O)cccc2C2=NOC(C3CN4CCC3CC4)N2Cc2ccc(OC)cc2OC)cc1>>COc1ccc(CN2CCOC3cccc(C4=NOC(C5CN6CCC5CC6)N4Cc4ccc(OC)cc4OC)c32)cc1



### Step 2

Type: O-TBS deprotection, Confidence: 0.86

COc1ccc(CN(CCO[Si](C)(C)C(C)(C)C)c2c(O)cccc2C2=NOC(C3CN4CCC3CC4)N2Cc2ccc(OC)cc2OC)cc1.C1CCOC1.CCCC[N+](CCCC)(CCCC)CCCC.[F-]>>COc1ccc(CN(CCO)c2c(O)cccc2C2=NOC(C3CN4CCC3CC4)N2Cc2ccc(OC)cc2OC)cc1



### Step 3

Type: O-Bn deprotection, Confidence: 0.65

COc1ccc(CN(CCO[Si](C)(C)C(C)(C)C)c2c(OCc3ccccc3)cccc2C2=NOC(C3CN4CCC3CC4)N2Cc2ccc(OC)cc2OC)cc1.C1CCOC1.[Pd]>>COc1ccc(CN(CCO[Si](C)(C)C(C)(C)C)c2c(O)cccc2C2=NOC(C3CN4CCC3CC4)N2Cc2ccc(OC)cc2OC)cc1

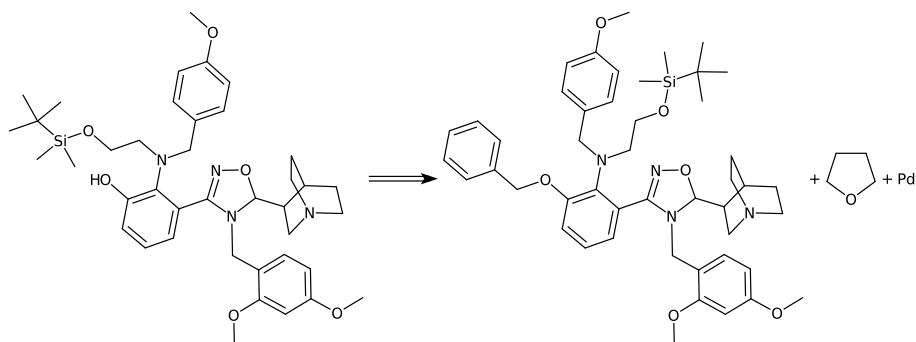

### Step 4

Type: Bromo N-alkylation, Confidence: 0.807

COc1ccc(CNc2c(OCc3ccccc3)cccc2C2=NOC(C3CN4CCC3CC4)N2Cc2ccc(OC)cc2OC)cc1.CC(C)(C)[Si](C)(C)OCCBr.CN(C)C=O.[H-].[Na+]>>COc1ccc(CN(CCO[Si](C)(C)(C)(C)c2c(OCc3ccccc3)cccc2C2=NOC(C3CN4CCC3CC4)N2Cc2ccc(OC)cc2OC)cc1

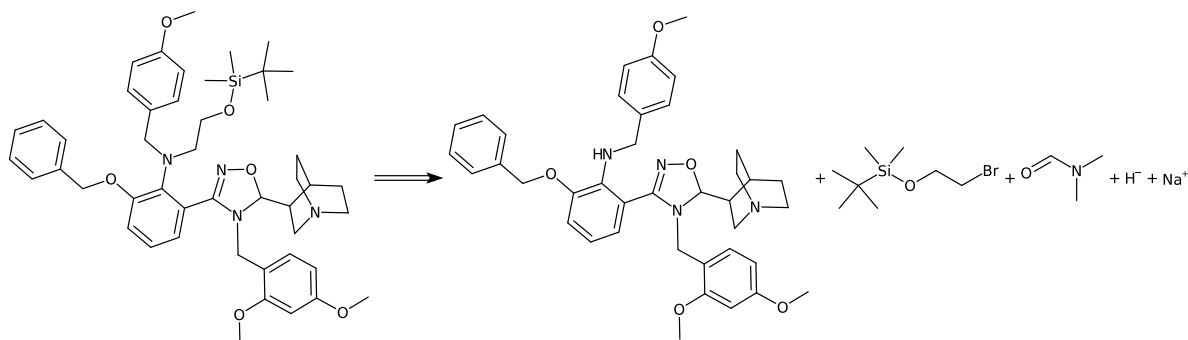

### Step 5

Type: Aldehyde reductive amination, Confidence: 0.724

COc1ccc(CN2C(c3ccccc3)ccccc2C2=NOC(C3CN4CCC3CC4)N2Cc2ccc(OC)cc2OC)c(OC)c1.CC(=O)O[BH-](OC(C)=O)OC(C)=O.[Na+].COc1ccc(C=O)cc1.ClCCl>>COc1ccc(CNc2c(OCc3ccccc3)cccc2C2=NOC(C3CN4CCC3CC4)N2Cc2ccc(OC)cc2OC)cc1



### Step 6

Type: Nitro to amino, Confidence: 0.934

COc1ccc(CN2C(c3cccc(OCc4ccccc4)c3[N+](=O)[O-])=NOC2C2CN3CCC2CC3)c(OC)c1.CCO.C  
I[Sn]Cl.O.O>>COc1ccc(CN2C(c3cccc(OCc4ccccc4)c3N)=NOC2C2CN3CCC2CC3)c(OC)c1

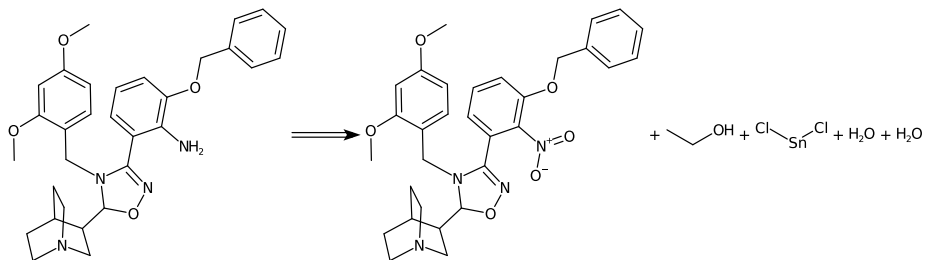

## Step 7

Type: Undefined, Confidence: 0.0

COc1ccc(CN2C(c3cccc(OCc4ccccc4)c3[N+](=O)[O-])=NOC2C2CN3CCC2CC3)c(OC)c1>>COc  
1ccc(CN2C(c3cccc(OCc4ccccc4)c3[N+](=O)[O-])=NOC2C2CN3CCC2CC3)c(OC)c1

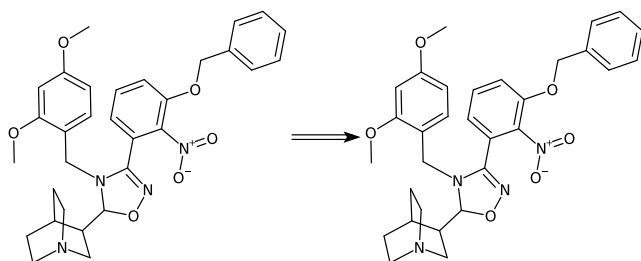



## Information about the retrosynthesis

Created On: 2019-09-26T17:09:59.309000

Model: MolecularTransformer\_v2.0\_R-Inchi-MolecularTransformer\_v2.0\_F

Product:

C1C=C(/N=N/C2C=CC(OC3OC(CO)C4C(OC(C)(OC)C(O4)(C)OC)C3O)=CC=2)C=CC=1OCC=C

MSSR: 15

FAP: 0.75

MRP: 20

SbP: 2

Available smiles:

Exclude smiles:

C1C=C(/N=N/C2C=CC(OC3OC(CO)C4C(OC(C)(OC)C(O4)(C)OC)C3O)=CC=2)C=CC=1OCC=C

Exclude substructures:

## Sequence 0, Confidence: 0.428

Metadata:

Warnings: 'ERROR MESSAGE'

### Step 1

Type: O-Ac deprotection, Confidence: 0.922

C=CCOc1ccc(/N=N/c2ccc(OC3OC(COC(C)=O)C4OC(C)(OC)C(C)(OC)OC4C3OC(C)=O)cc2)cc1.CO.O=C([O-])[O-].[K+].[K+]>>C=CCOc1ccc(/N=N/c2ccc(OC3OC(CO)C4OC(C)(OC)C(C)(OC)OC4C3O)cc2)cc1

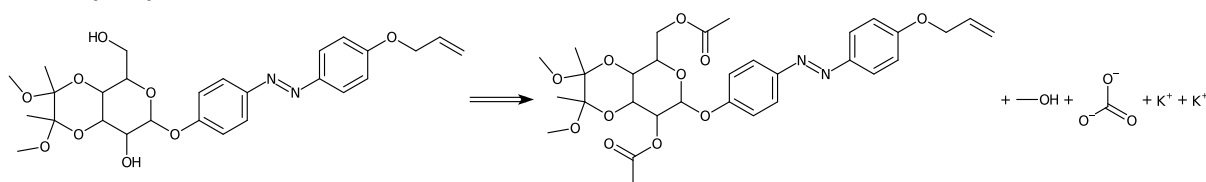

### Step 2

Type: Williamson ether synthesis, Confidence: 0.716

C=CCOc1ccc(/N=N/c2ccc(O)cc2)cc1.COC1(C)OC2C(COC(C)=O)OC(Br)C(OC(C)=O)C2OC1(C)OC.CN(C)C=O.[H-].[Na+]>>C=CCOc1ccc(/N=N/c2ccc(OC3OC(COC(C)=O)C4OC(C)(OC)C(C)(OC)OC4C3OC(C)=O)cc2)cc1

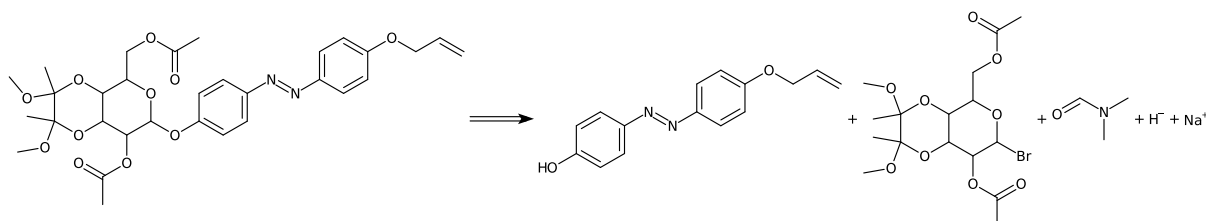

### Step 3

Type: Methoxy to hydroxy, Confidence: 0.895

C=CCOc1ccc(/N=N/c2ccc(OC)cc2)cc1.BrB(Br)Br.ClCCl>>C=CCOc1ccc(/N=N/c2ccc(O)cc2)cc1

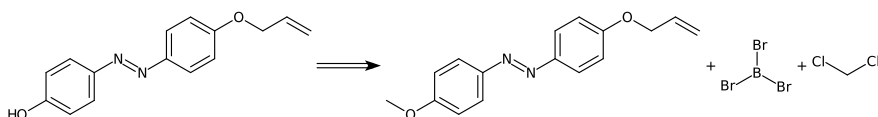

Type: Unrecognized, Confidence: 0.787

COC1(C)OC2C(CO)OC(Br)C(O)C2OC1(C)OC.CC(=O)OC(C)=O.c1ccncc1>>COC1(C)OC2C(CO)C(C)=O)OC(Br)C(OC(C)=O)C2OC1(C)OC

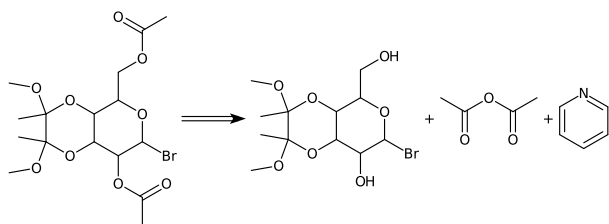

#### Step 4

Type: *Williamson ether synthesis*, Confidence: 0.92

COC1ccc(/N=N/c2ccc(O)cc2)cc1.C=CCBr.[NaH]>>C=CCOC1ccc(/N=N/c2ccc(OC)cc2)cc1

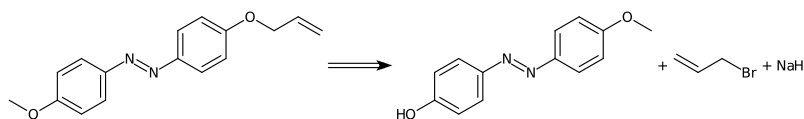

Type: *Undefined*, Confidence: 0.0

COC1(C)OC2C(CO)OC(Br)C(O)C2OC1(C)OC>>COC1(C)OC2C(CO)OC(Br)C(O)C2OC1(C)OC

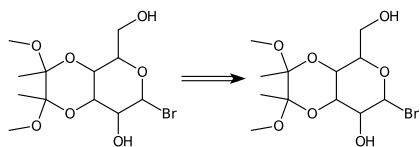



## Information about the retrosynthesis

Created On: 2019-10-01T14:05:49.729000

Model: MolecularTransformer\_v2.0\_R-Inchi-MolecularTransformer\_v2.0\_F

Product:

C=CCOC1C=CC(/N=N/C2C=CC(OC3C(O)C4C(OC(C(O4)(OC)C)(OC)C)C(CO)O3)=CC=2)=CC=1

MSSR: 15

FAP: 0.6

MRP: 50

SbP: 3

Available smiles:

Exclude smiles:

C=CCOC1C=CC(/N=N/C2C=CC(OC3C(O)C4C(OC(C(O4)(OC)C)(OC)C)C(CO)O3)=CC=2)=CC=1

Exclude substructures:

## Sequence 0, Confidence: 0.428

Metadata:

Errors: No predictions above FAP. Reduce FAP, increase MRP or inspect siblings.

### Step 1

Type: O-Ac deprotection, Confidence: 0.922

C=CCOc1ccc(/N=N/c2ccc(OC3OC(COC(C)=O)C4OC(C)(OC)C(C)(OC)OC4C3OC(C)=O)cc2)cc1.CO.O=C([O-])[O-].[K+].[K+]>>C=CCOc1ccc(/N=N/c2ccc(OC3OC(CO)C4OC(C)(OC)C(C)(OC)OC4C3O)cc2)cc1

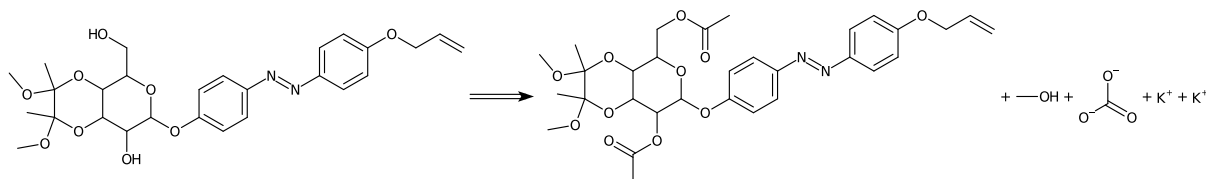

### Step 2

Type: Williamson ether synthesis, Confidence: 0.716

C=CCOc1ccc(/N=N/c2ccc(O)cc2)cc1.COC1(C)OC2C(COC(C)=O)OC(Br)C(OC(C)=O)C2OC1(C)OC.CN(C)C=O.[H-].[Na+]>>C=CCOc1ccc(/N=N/c2ccc(OC3OC(COC(C)=O)C4OC(C)(OC)C(C)(OC)OC4C3OC(C)=O)cc2)cc1



### Step 3

Type: Methoxy to hydroxy, Confidence: 0.895

C=CCOc1ccc(/N=N/c2ccc(OC)cc2)cc1.BrB(Br)Br.ClCCl>>C=CCOc1ccc(/N=N/c2ccc(O)cc2)cc1

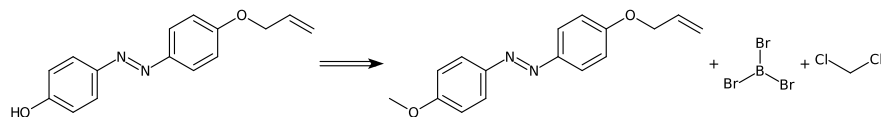

Type: Unrecognized, Confidence: 0.787

COC1(C)OC2C(CO)OC(Br)C(O)C2OC1(C)OC.CC(=O)OC(C)=O.c1ccncc1>>COC1(C)OC2C(CO)C(C)=O)OC(Br)C(OC(C)=O)C2OC1(C)OC





### Step 4

Type: *Williamson ether synthesis*, Confidence: 0.92

COC1ccc(/N=N/c2ccc(O)cc2)cc1.C=CCBr.[NaH]>>C=CCOC1ccc(/N=N/c2ccc(OC)cc2)cc1



Type: *Undefined*, Confidence: 0.0

COC1(C)OC2C(CO)OC(Br)C(O)C2OC1(C)OC>>COC1(C)OC2C(CO)OC(Br)C(O)C2OC1(C)OC





## Information about the retrosynthesis

Created On: 2019-09-26T17:10:10.302000

Model: MolecularTransformer\_v2.0\_R-Inchi-MolecularTransformer\_v2.0\_F

Product: C1N(C)CCC(NC(=O)C2C(F)=CC(NC3N=CC(C)=C(NC4C=C5N(S(C(C)(C)C)(=O)=O)CCC5=CC=4)N=3)=CC=2)C1

MSSR: 15

FAP: 0.75

MRP: 20

SbP: 2

Available smiles:

Exclude smiles: C1N(C)CCC(NC(=O)C2C(F)=CC(NC3N=CC(C)=C(NC4C=C5N(S(C(C)(C)C)(=O)=O)CCCC5=CC=4)N=3)=CC=2)C1

Exclude substructures:

## Sequence 0, Confidence: 0.835

### Step 1

Type: Chloro N-arylation, Confidence: 0.968

CN1CCC(NC(=O)c2ccc(N)cc2F)CC1.Cc1cnc(Cl)nc1Nc1ccc2c(c1)N(S(=O)(=O)C(C)(C)C)CCC2.CC(C)O>>Cc1cnc(Nc2ccc(C(=O)NC3CCN(C)CC3)c(F)c2)nc1Nc1ccc2c(c1)N(S(=O)(=O)C(C)(C)C)CCC2

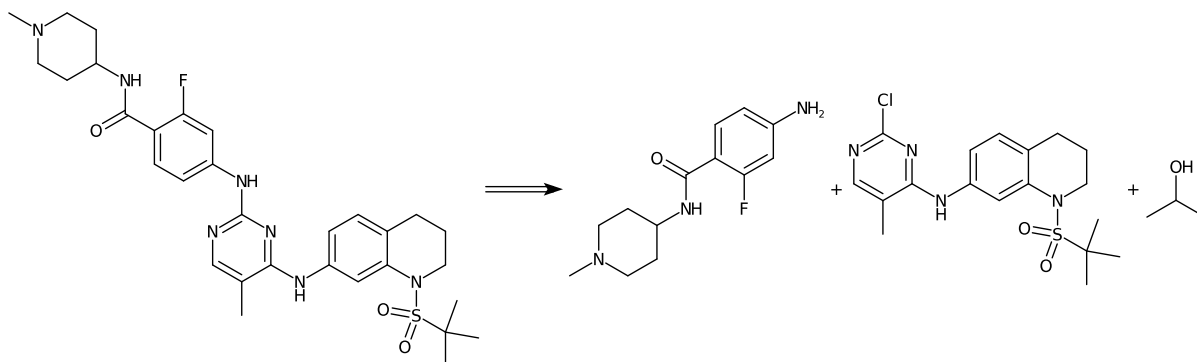

### Step 2

Type: Carboxylic acid + amine condensation, Confidence: 0.957

CN1CCC(N)CC1.Nc1ccc(C(=O)O)c(F)c1>>CN1CCC(NC(=O)c2ccc(N)cc2F)CC1

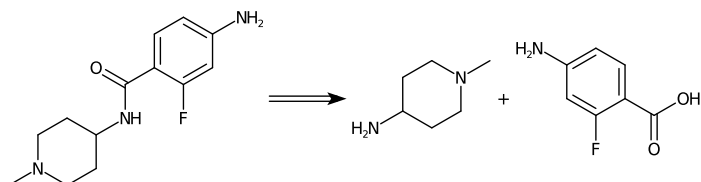

Type: Chloro N-arylation, Confidence: 0.942

CC(C)(C)S(=O)(=O)N1CCCc2ccc(N)cc21.CN(C)C=O.Cc1cnc(Cl)nc1Cl>>Cc1cnc(Cl)nc1Nc1ccc2c(c1)N(S(=O)(=O)C(C)(C)C)CCC2

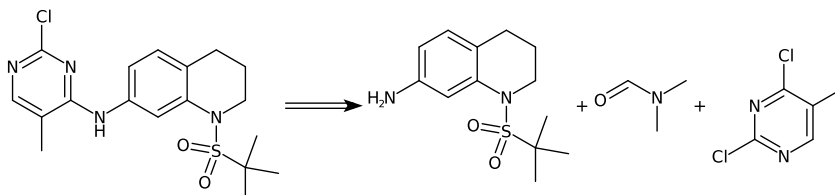

### Step 3

Type: Nitro to amino, Confidence: 0.988

CC(C)(C)S(=O)(=O)N1CCCc2ccc([N+](=O)[O-])cc21.CCOC(C)=O.[Pd]>>CC(C)(C)S(=O)(=O)N1CCCc2ccc(N)cc21

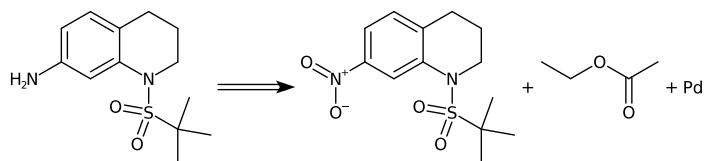

#### Step 4

Type: Sulfonamide Schotten-Baumann, Confidence: 0.968

CC(C)(C)S(=O)(=O)Cl.ClCCCl.O=[N+](O-)[c1ccc2c(c1)NCCC2]>>CC(C)(C)S(=O)(=O)N1CCCc2ccc([N+](=O)[O-])cc21

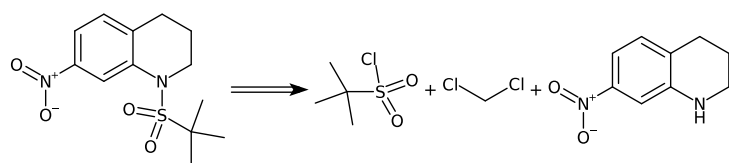



## Information about the retrosynthesis

Created On: 2019-09-26T19:42:38.407000

Model: MolecularTransformer\_v2.0\_R-Inchi-MolecularTransformer\_v2.0\_F

Product: C1C(N2CCN(C3N=C(C(F)(F)F)C(C4CC4)=CN=3)C(C(C)C)C2)=CC=C(F)C=1S(=O)(=O)C

MSSR: 15

FAP: 0.75

MRP: 20

SbP: 2

Available smiles:

Exclude smiles:

C1C(N2CCN(C3N=C(C(F)(F)F)C(C4CC4)=CN=3)C(C(C)C)C2)=CC=C(F)C=1S(=O)(=O)C

Exclude substructures:

## Sequence 0, Confidence: 0.875

### Step 1

Type: Chloro N-arylation, Confidence: 0.949

CC(C)C1CN(c2ccc(F)c(S(C)(=O)=O)c2)CCN1.FC(F)(F)c1nc(Cl)ncc1C1CC1.O=C([O-])[O-].[K+].[K+]>>CC(C)C1CN(c2ccc(F)c(S(C)(=O)=O)c2)CCN1c1ncc(C2CC2)c(C(F)(F)F)n1

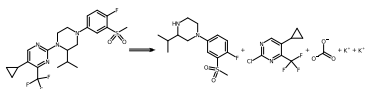

### Step 2

Type: Bromo Buchwald-Hartwig amination, Confidence: 0.938

CC(C)C1CNCCN1.CS(=O)(=O)c1cc(Br)ccc1F.Cc1ccccc1.O=C(/C=C/c1ccccc1)/C=C/c1ccccc1.O=C(/C=C/c1ccccc1)/C=C/c1ccccc1.O=C(/C=C/c1ccccc1)/C=C/c1ccccc1.[Pd].[Pd].O=C([O-])[O-].[Cs+].[Cs+].c1ccc(P(c2ccccc2)c2ccc3ccccc3c2-c2c(P(c3ccccc3)c3ccccc3)ccc3ccccc23)c1.O=C(/C=C/c1ccccc1)/C=C/c1ccccc1.O=C(/C=C/c1ccccc1)/C=C/c1ccccc1.O=C(/C=C/c1ccccc1)/C=C/c1ccccc1.O=C(/C=C/c1ccccc1)/C=C/c1ccccc1.[Pd].[Pd].O=C([O-])[O-].[Cs+].[Cs+]>>CC(C)C1CN(c2ccc(F)c(S(C)(=O)=O)c2)CCN1

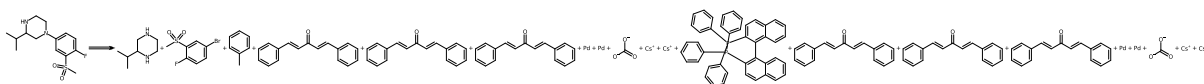

Type: Bromo Suzuki-type coupling, Confidence: 0.983

C1CCC(P(C2CCCCC2)C2CCCCC2)CC1.Cc1ccccc1.FC(F)(F)c1nc(Cl)ncc1Br.O.O=P([O-])([O-])[O-].[K+].[K+].[K+].OB(O)C1CC1.O=P([O-])([O-])[O-].[K+].[K+].[K+]>>FC(F)(F)c1nc(Cl)ncc1C1C C1

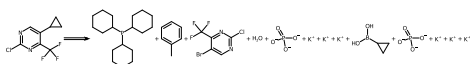



## Information about the retrosynthesis

Created On: 2019-09-26T19:42:54.341000

Model: MolecularTransformer\_v2.0\_R-Inchi-MolecularTransformer\_v2.0\_F

Product:

CC(C)(O)CNC(=O)C1N=CC(C2(OCCC2)C2C=CC(B3OC(C)(C)C(C)(C)O3)=CC=2)=CC=1

MSSR: 15

FAP: 0.75

MRP: 20

SbP: 2

Available smiles:

Exclude smiles:

CC(C)(O)CNC(=O)C1N=CC(C2(OCCC2)C2C=CC(B3OC(C)(C)C(C)(C)O3)=CC=2)=CC=1

Exclude substructures:

## Sequence 0, Confidence: 0.673

### Step 1

Type: Bromo Miyaura boration, Confidence: 0.966

CC(C)(O)CNC(=O)c1ccc(C2(c3ccc(Br)cc3)CCCO2)cn1.C1COCCO1.CC(=O)[O-].[K+].CC1(C)OB(B2OC(C)(C)C(C)(C)O2)OC1(C)C.ClCCl.Cl[Pd]Cl.[Fe+2].c1ccc(P(c2ccccc2)[c-]2ccccc2)cc1.c1ccc(P(c2ccccc2)[c-]2ccccc2)cc1>>CC(C)(O)CNC(=O)c1ccc(C2(c3ccc(B4OC(C)(C)C(C)(C)O4)c3)CCCO2)cn1

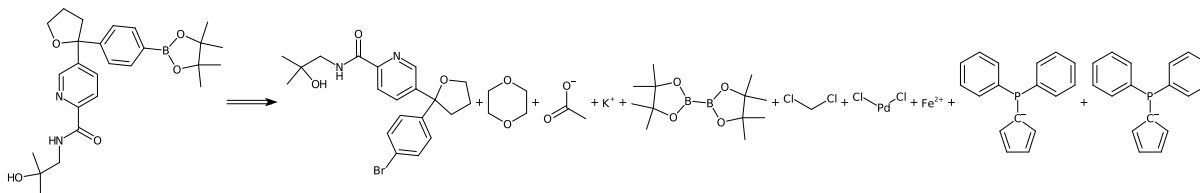

### Step 2

Type: Carboxylic acid + amine condensation, Confidence: 0.984

O=C(O)c1ccc(C2(c3ccc(Br)cc3)CCCO2)cn1.CC(C)(O)CN>>CC(C)(O)CNC(=O)c1ccc(C2(c3ccc(Br)cc3)CCCO2)cn1

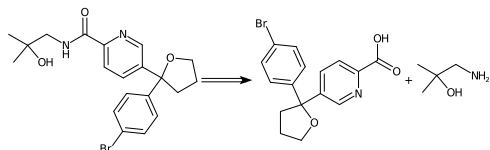

### Step 3

Type: CO<sub>2</sub>H-Me deprotection, Confidence: 0.98

COC(=O)c1ccc(C2(c3ccc(Br)cc3)CCCO2)cn1.[Li]O>>O=C(O)c1ccc(C2(c3ccc(Br)cc3)CCCO2)cn1

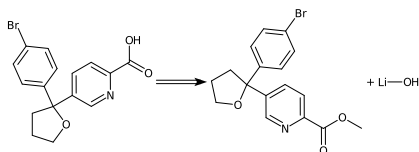

### Step 4

Type: Unrecognized, Confidence: 0.952

COC(=O)c1ccc(C(O)(CCCO)c2ccc(Br)cc2)cn1.CS(=O)(=O)O.ClCCl>>COC(=O)c1ccc(C2(c3ccc(Br)cc3)CCCO2)cn1



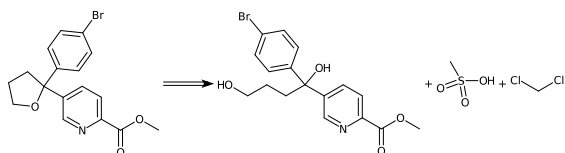

### Step 5

Type: Alkene hydration, Confidence: 0.979

C=CCC(O)(c1ccc(Br)cc1)c1ccc(C(=O)OC)nc1.B.C1CCOC1.C1CCOC1.OO.[Na+].[OH-]>>COC(=O)c1ccc(C(O)(CCCO)c2ccc(Br)cc2)cn1

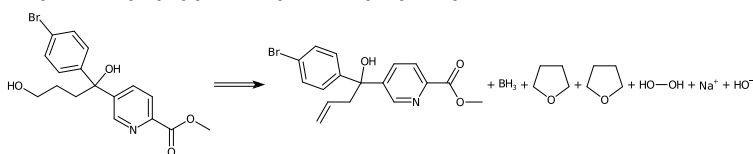

### Step 6

Type: Bromo ketone Barbier reaction, Confidence: 0.95

COC(=O)c1ccc(C(=O)c2ccc(Br)cc2)cn1.C1CCOC1.C=CCBr.[Zn]>>C=CCC(O)(c1ccc(Br)cc1)c1ccc(C(=O)OC)nc1

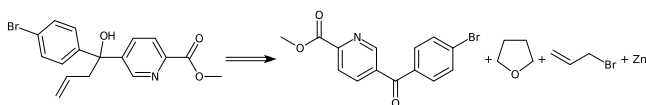

### Step 7

Type: Alcohol to ketone oxidation, Confidence: 0.983

COC(=O)c1ccc(C(O)c2ccc(Br)cc2)cn1.ClCCl.O=[Mn]=O>>COC(=O)c1ccc(C(=O)c2ccc(Br)cc2)cn1

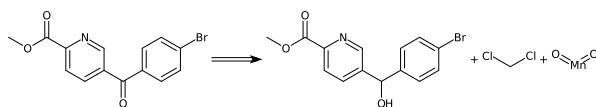

### Step 8

Type: Unrecognized, Confidence: 0.829

C1CCOC1.COC(=O)c1ccc(Br)cn1.O=Cc1ccc(Br)cc1.[Li]CCCC>>COC(=O)c1ccc(C(O)c2ccc(Br)cc2)cn1

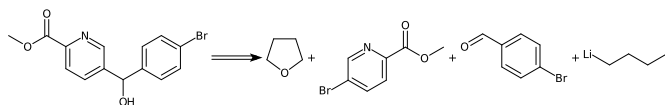



## Information about the retrosynthesis

Created On: 2019-09-26T19:43:08.998000

Model: MolecularTransformer\_v2.0\_R-Inchi-MolecularTransformer\_v2.0\_F

Product:

C1(C2=C(N=CS2)C=C(C2C=CC(N3CCN(S(C)(=O)=O)CC3)=CC=2)C=1)OC(C)C1CNC(=O)C1

MSSR: 15

FAP: 0.75

MRP: 20

SbP: 2

Available smiles:

Exclude smiles:

C1(C2=C(N=CS2)C=C(C2C=CC(N3CCN(S(C)(=O)=O)CC3)=CC=2)C=1)OC(C)C1CNC(=O)C1

Exclude substructures:

## Sequence 0, Confidence: 0.696

### Step 1

Type: Bromo Suzuki-type coupling, Confidence: 0.963

CC(Oc1cc(Br)cc2ncsc12)C1CNC(=O)C1.CC1(C)OB(c2ccc(N3CCN(S(C)(=O)=O)CC3)cc2)OC1(C)C>>CC(Oc1cc(-c2ccc(N3CCN(S(C)(=O)=O)CC3)cc2)cc2ncsc12)C1CNC(=O)C1

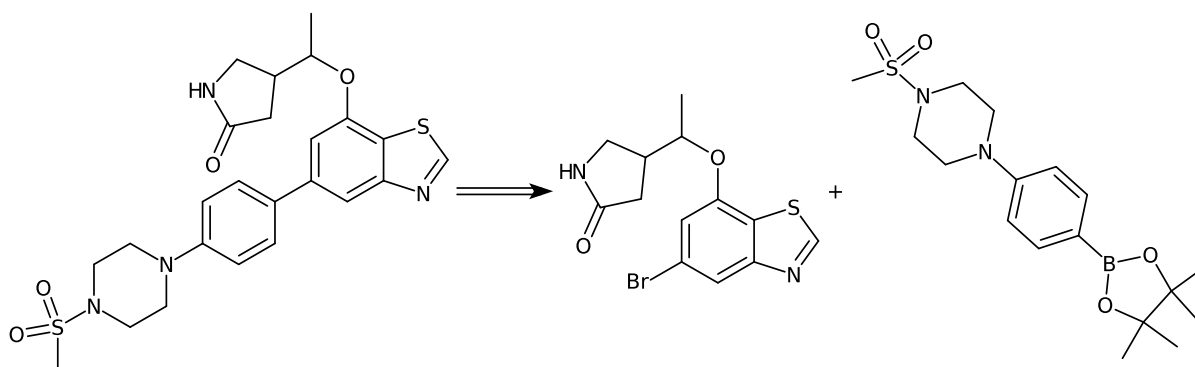

### Step 2

Type: SNAr ether synthesis, Confidence: 0.961

CC(O)C1CNC(=O)C1.Fc1cc(Br)cc2ncsc12.[NaH]>>CC(Oc1cc(Br)cc2ncsc12)C1CNC(=O)C1

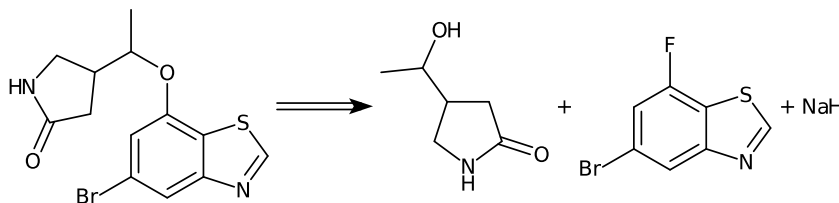

Type: Sulfonamide Schotten-Baumann, Confidence: 0.989

CC1(C)OB(c2ccc(N3CCNCC3)cc2)OC1(C)C.CS(=O)(=O)Cl.ClCCl>>CC1(C)OB(c2ccc(N3CCN(S(C)(=O)=O)CC3)cc2)OC1(C)C

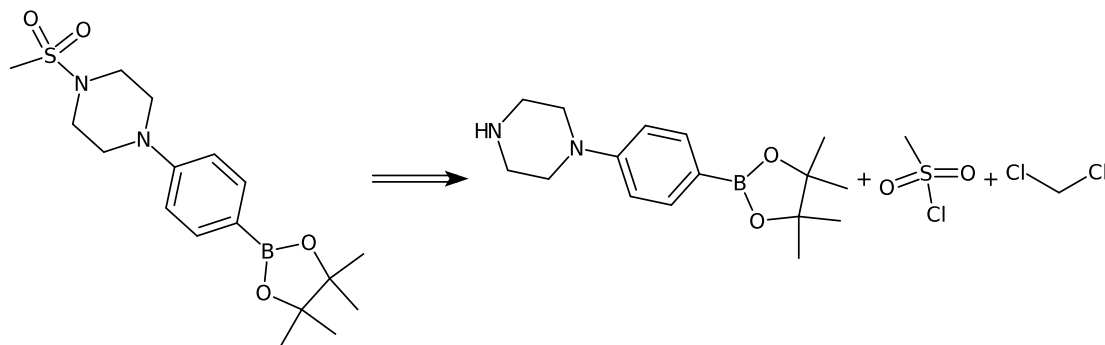

### Step 3

Type: Ketone to alcohol reduction, Confidence: 0.974

CC(=O)C1CNC(=O)C1.CCO.O.[BH4-].[Na+]>>CC(O)C1CNC(=O)C1

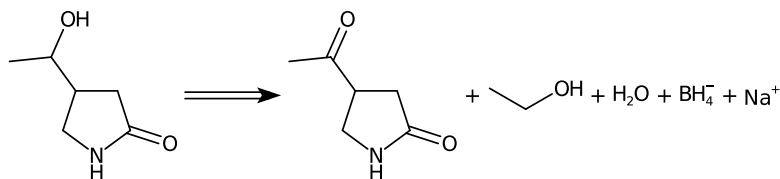

Type: Unrecognized, Confidence: 0.989

Nc1cc(Br)cc(F)c1S.CCOC(OCC)OCC>>Fc1cc(Br)cc2ncsc12

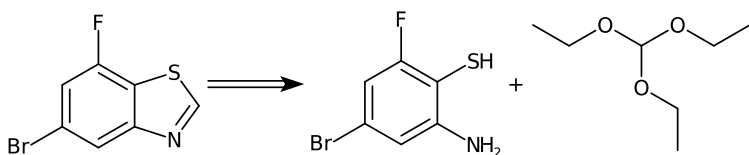

#### Step 4

Type: Unrecognized, Confidence: 0.986

CON(C)C(=O)C1CNC(=O)C1.[Li]C>>CC(=O)C1CNC(=O)C1

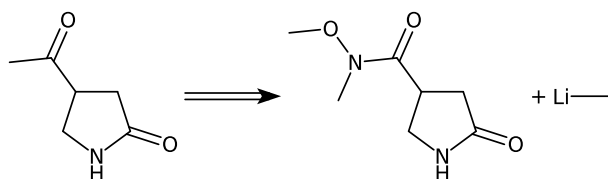

Type: Nitro to amino, Confidence: 0.975

O=[N+][O-]c1cc(Br)cc(F)c1S.CO.[Cl-].[NH4+].[Fe]>>Nc1cc(Br)cc(F)c1S

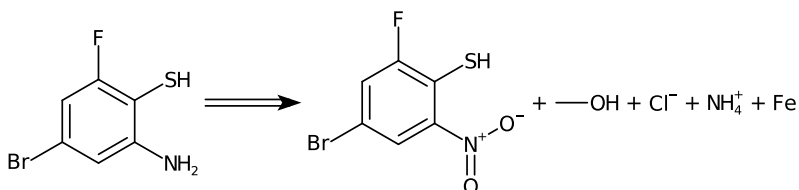

#### Step 5

Type: Weinreb amide synthesis, Confidence: 0.963

CNOC.Cl.O=C1CC(C(=O)O)CN1.CNOC.Cl>>CON(C)C(=O)C1CNC(=O)C1

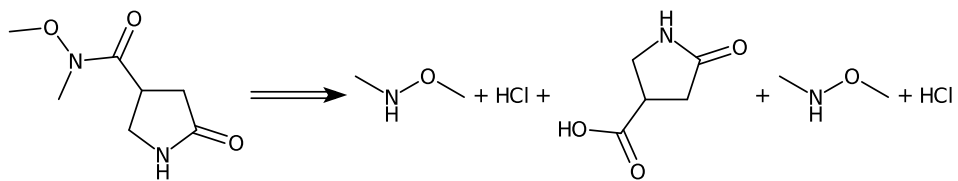

**Type: Fluoro to sulfanyl, Confidence: 0.852**

**CN(C)C=O.O.O.O=[N+][O-]c1cc(Br)cc(F)c1F.S.[Na].S.[Na]>>O=[N+][O-]c1cc(Br)cc(F)c1S**

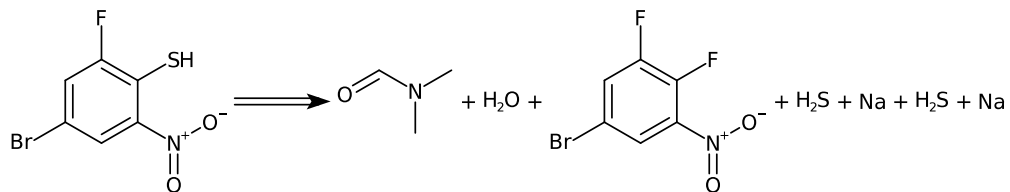



## Information about the retrosynthesis

Created On: 2019-09-30T15:04:42.289000

Model: MolecularTransformer\_v2.0\_R-Inchi-MolecularTransformer\_v2.0\_F

Product:

CC1=C(C)C2/C(=N/C(C3N(C=2S1)C(C)=NN=3)CC(OC1CCC(O)CC1)=O)/C1C=CC(Cl)=CC=1

MSSR: 15

FAP: 0.75

MRP: 20

SbP: 2

Available smiles:

Exclude smiles:

CC1=C(C)C2/C(=N/C(C3N(C=2S1)C(C)=NN=3)CC(OC1CCC(O)CC1)=O)/C1C=CC(Cl)=CC=1

Exclude substructures:

## Sequence 0, Confidence: 0.684

### Step 1

Type: Esterification, Confidence: 0.739

Cc1sc2c(c1C)C(c1ccc(Cl)cc1)=NC(CC(=O)O)c1nnc(C)n1-2.CN(C)C=O.O=C(n1ccnc1)n1ccnc1.OC1CCC(O)CC1>>Cc1sc2c(c1C)C(c1ccc(Cl)cc1)=NC(CC(=O)OC1CCC(O)CC1)c1nnc(C)n1-2

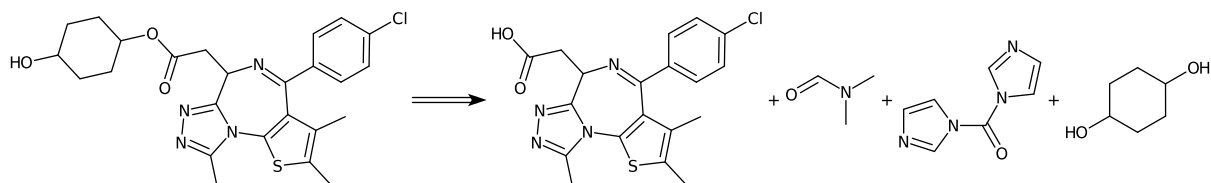

### Step 2

Type: CO<sub>2</sub>H-tBu deprotection, Confidence: 0.926

Cc1sc2c(c1C)C(c1ccc(Cl)cc1)=NC(CC(=O)OC(C)(C)C)c1nnc(C)n1-2.O=C(O)C(F)(F)F>>Cc1sc2c(c1C)C(c1ccc(Cl)cc1)=NC(CC(=O)O)c1nnc(C)n1-2

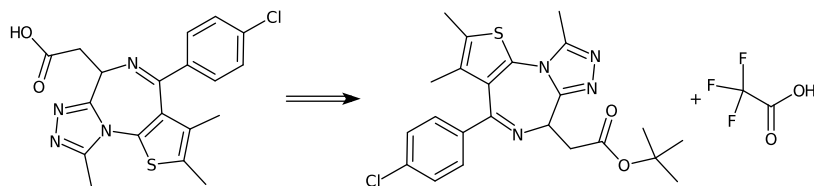

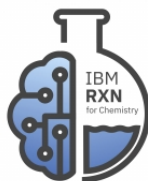

## Information about the retrosynthesis

Created On: 2019-09-26T19:43:45.401000

Model: MolecularTransformer\_v2.0\_R-Inchi-MolecularTransformer\_v2.0\_F

Product: CCOC(=O)/C=C/C(NC(=O)C(NC(=O)C(NC(C1=NOC(C)=C1)=O)C1CCCC1)CC1C=CC(F)=CC=1)CC1C(=O)NCC1

MSSR: 15

FAP: 0.75

MRP: 20

SbP: 2

Available smiles:

Exclude smiles: CCOC(=O)/C=C/C(NC(=O)C(NC(=O)C(NC(C1=NOC(C)=C1)=O)C1CCCC1)CC1C=CC(F)=CC=1)CC1C(=O)NCC1

Exclude substructures:



## Sequence 0, Confidence: 0.77

Metadata:

Warnings: 'ERROR MESSAGE'

### Step 1

Type: Carboxylic acid + amine condensation, Confidence: 0.829

CCOC(=O)/C=C/C(CC1CCNC1=O)NC(=O)C(N)Cc1ccc(F)cc1.Cc1cc(C(=O)NC(C(=O)O)C2CCCC2)no1.CN(C)C(On1nnc2cccnc21)=[N+](C)C.F[P-](F)(F)(F)(F)F.CN(C)C=O>>CCOC(=O)/C=C/C(CC1CCNC1=O)NC(=O)C(N)Cc1ccc(F)cc1)NC(=O)C(NC(=O)c1cc(C)on1)C1CCCC1

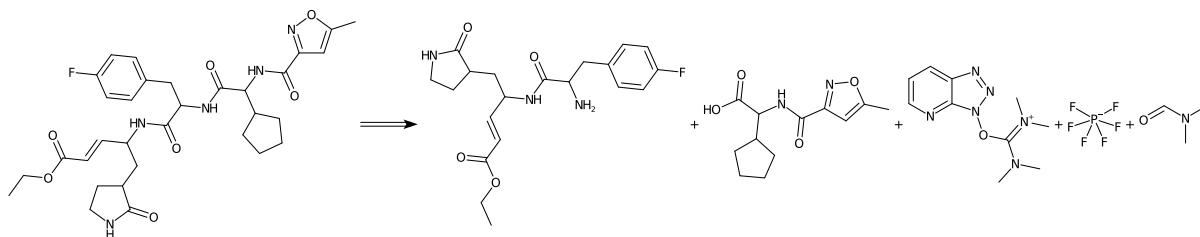

### Step 2

Type: Undefined, Confidence: 0.0

CCOC(=O)/C=C/C(CC1CCNC1=O)NC(=O)C(N)Cc1ccc(F)cc1>>CCOC(=O)/C=C/C(CC1CCNC1=O)NC(=O)C(N)Cc1ccc(F)cc1

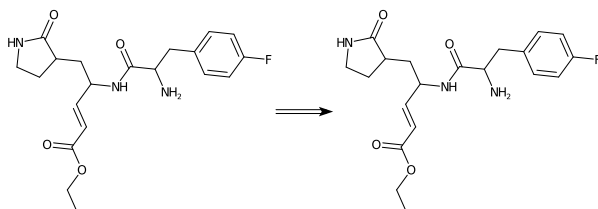

Type: Amide Schotten-Baumann, Confidence: 0.929

Cc1cc(C(=O)Cl)no1.NC(C(=O)O)C1CCCC1>>Cc1cc(C(=O)NC(C(=O)O)C2CCCC2)no1

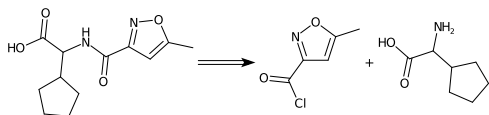



## Information about the retrosynthesis

Created On: 2019-09-30T15:20:05.435000

Model: MolecularTransformer\_v2.0\_R-Inchi-MolecularTransformer\_v2.0\_F

Product: CCOC(/C=C/C(NC(C(NC(C(C1CCCC1)NC(C1=NOC(C)=C1)=O)=O)CC1C=CC(F)=CC=1)=O)CC1C(=O)NCC1)=O

MSSR: 15

FAP: 0.6

MRP: 50

SbP: 3

Available smiles:

Exclude smiles: CCOC(/C=C/C(NC(C(NC(C(C1CCCC1)NC(C1=NOC(C)=C1)=O)=O)CC1C=CC(F)=CC=1)=O)CC1C(=O)NCC1)=O

Exclude substructures:

## Sequence 0.0805, Confidence: 0.121

### Step 1

Type: Carboxylic acid + amine condensation, Confidence: 0.829

CCOC(=O)/C=C/C(CC1CCNC1=O)NC(=O)C(N)Cc1ccc(F)cc1.Cc1cc(C(=O)NC(C(=O)O)C2CCCC2)no1.CN(C)C(On1nnc2cccnc21)=[N+](C)C.F[P-](F)(F)(F)(F)F.CN(C)C=O>>CCOC(=O)/C=C/C(CC1CCNC1=O)NC(=O)C(Cc1ccc(F)cc1)NC(=O)C(NC(=O)c1cc(C)on1)C1CCCC1

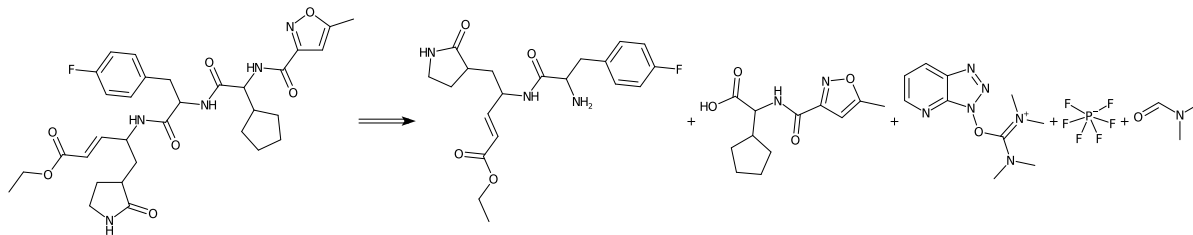

### Step 2

Type: N-Boc deprotection, Confidence: 0.607

CCOC(=O)/C=C/C(CC1CCNC1=O)NC(=O)C(Cc1ccc(F)cc1)NC(=O)OC(C)(C)C.O=C(O)C(F)(F)F>>CCOC(=O)/C=C/C(CC1CCNC1=O)NC(=O)C(N)Cc1ccc(F)cc1

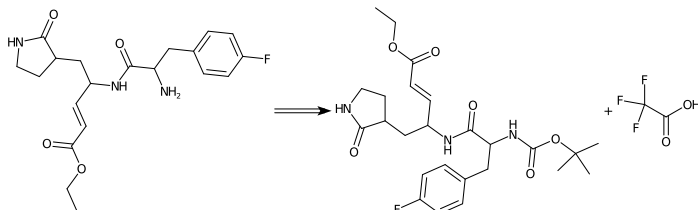

Type: Amide Schotten-Baumann, Confidence: 0.929

Cc1cc(C(=O)Cl)no1.NC(C(=O)O)C1CCCC1>>Cc1cc(C(=O)NC(C(=O)O)C2CCCC2)no1

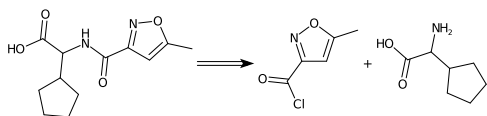

### Step 3

Type: Carboxylic acid + amine condensation, Confidence: 0.836

CCOC(=O)/C=C/C(N)CC1CCNC1=O.CC(C)(C)OC(=O)NC(Cc1ccc(F)cc1)C(=O)O.CCN(C(C)C)C(C)C.CN(C)C(On1nnc2cccnc21)=[N+](C)C.F[P-](F)(F)(F)(F)F.ClCCl>>CCOC(=O)/C=C/C(CC1CCNC1=O)NC(=O)C(Cc1ccc(F)cc1)NC(=O)OC(C)(C)C

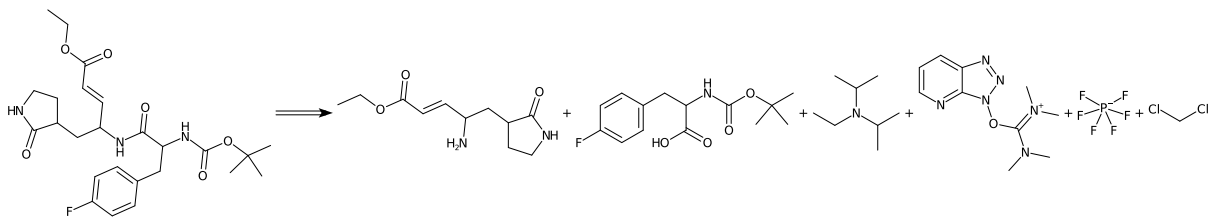

### Step 4

Type: Ketone reductive amination, Confidence: 0.855

CCOC(=O)/C=C/C(=O)CC1CCNC1=O.CC(=O)[O-].[NH4+].CO.[BH3-]C#N.[Na+]>>CCOC(=O)/C=C/C(N)CC1CCNC1=O

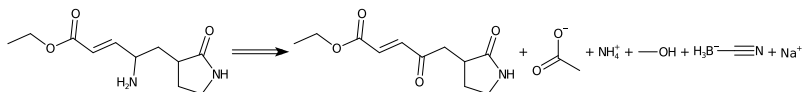

### Step 5

Type: Alcohol to ketone oxidation, Confidence: 0.962

CCOC(=O)/C=C/C(O)CC1CCNC1=O.ClCCl.[Mn+4].[O-2].[O-2]>>CCOC(=O)/C=C/C(=O)CC1CCNC1=O

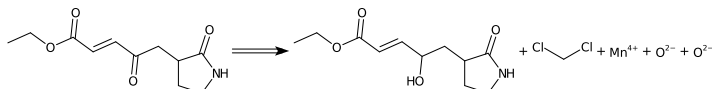

### Step 6

Type: O-TBS deprotection, Confidence: 0.843

CCOC(=O)/C=C/C(CC1CCNC1=O)O[Si](C)(C)C(C)(C)C.C1CCOC1.CCCC[N+](CCCC)(CCCC)CC.CC.[F-]>>CCOC(=O)/C=C/C(O)CC1CCNC1=O

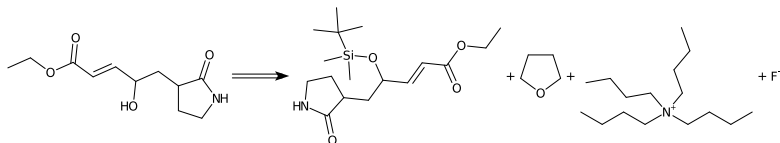

### Step 7

Type: Horner-Wadsworth-Emmons reaction, Confidence: 0.668

CC(C)(C)[Si](C)(C)OC(C=O)CC1CCNC1=O.C1CCOC1.CCOC(=O)CP(=O)(OCC)OCC.[H-].[Na+]>>CCOC(=O)/C=C/C(CC1CCNC1=O)O[Si](C)(C)C(C)(C)C

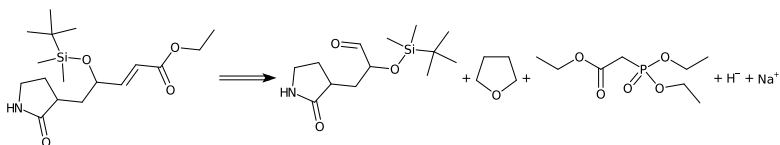

### Step 8

Type: Aldehyde Dess-Martin oxidation, Confidence: 0.961

CC(C)(C)[Si](C)(C)OC(CO)CC1CCNC1=O.CC(=O)OI1(OC(C)=O)(OC(C)=O)OC(=O)c2ccccc21.CICCl>>CC(C)(C)[Si](C)(C)OC(C=O)CC1CCNC1=O

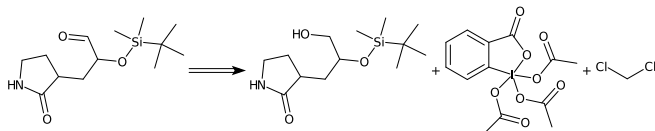

### Step 9

Type: O-Bn deprotection, Confidence: 0.961

CC(C)(C)[Si](C)(C)OC(COCc1ccccc1)CC1CCNC1=O.CO.[HH].[Pd]>>CC(C)(C)[Si](C)(C)OC(CO)CC1CCNC1=O

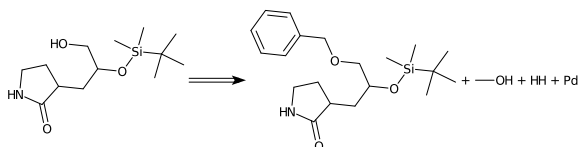

### Step 10

Type: O-TBS protection, Confidence: 0.948

O=C1NCCC1CC(O)COCc1ccccc1.CC(C)(C)[Si](C)(C)Cl.c1c[nH]cn1>>CC(C)(C)[Si](C)(C)OC(COCc1ccccc1)CC1CCNC1=O

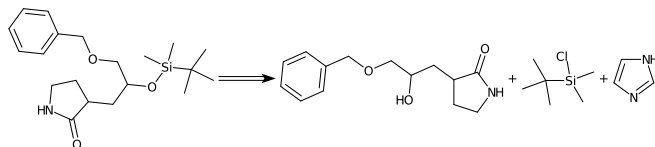

### Step 11

Type: Ketone to alcohol reduction, Confidence: 0.971

O=C(COCc1ccccc1)CC1CCNC1=O.CO.[BH4-].[Na+]>>O=C1NCCC1CC(O)COCc1ccccc1

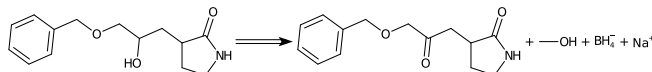

### Step 12

Type: N-Boc deprotection, Confidence: 0.858

CC(C)(C)OC(=O)N1CCC(CC(=O)COCc2ccccc2)C1=O.CICCl.O=C(O)C(F)(F)F>>O=C(COCc1ccccc1)CC1CCNC1=O

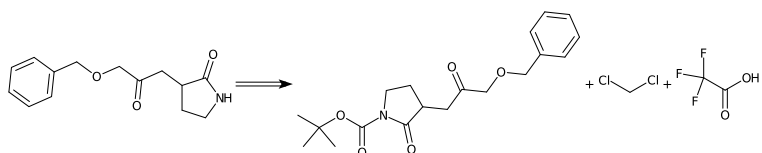

### Step 13

Type: Unrecognized, Confidence: 0.918

C1CCOC1.CC(C)(C)OC(=O)N1CCCC1=O.C[Si](C)(C)[N-][Si](C)(C)C.[Li+].O=C(CBr)COCc1ccc  
cc1.C[Si](C)(C)[N-][Si](C)(C)C.[Li+]>>CC(C)(C)OC(=O)N1CCC(CC(=O)COCc2ccccc2)C1=O

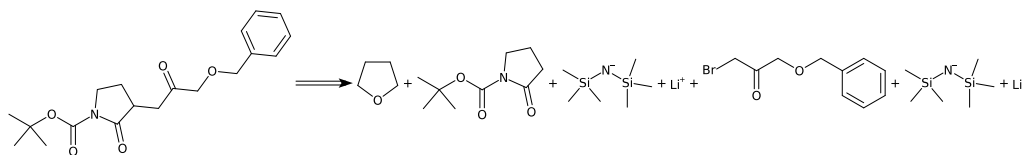



## Information about the retrosynthesis

Created On: 2019-09-26T19:43:59.143000

Model: MolecularTransformer\_v2.0\_R-Inchi-MolecularTransformer\_v2.0\_F

Product:

C1C=CC=CC=1/N=C1\S/C(=C/C2=C(C)N(CCN3CCOCC3)C(C)=C2)/C(=O)N\1C1CCCCC1

MSSR: 15

FAP: 0.75

MRP: 20

SbP: 2

Available smiles:

Exclude smiles:

C1C=CC=CC=1/N=C1\S/C(=C/C2=C(C)N(CCN3CCOCC3)C(C)=C2)/C(=O)N\1C1CCCCC1

Exclude substructures:

## Sequence 0, Confidence: 0.0

Metadata:

Errors: 'ERROR MESSAGE'

### Step 1

Type: Unrecognized, Confidence: 0.0

Cc1cc(/C=C2/S/C(=Nc3ccccc3)N(C3CCCCC3)C2=O)c(C)n1CCN1CCOCC1>>Cc1cc(/C=C2/S/C(=Nc3ccccc3)N(C3CCCCC3)C2=O)c(C)n1CCN1CCOCC1

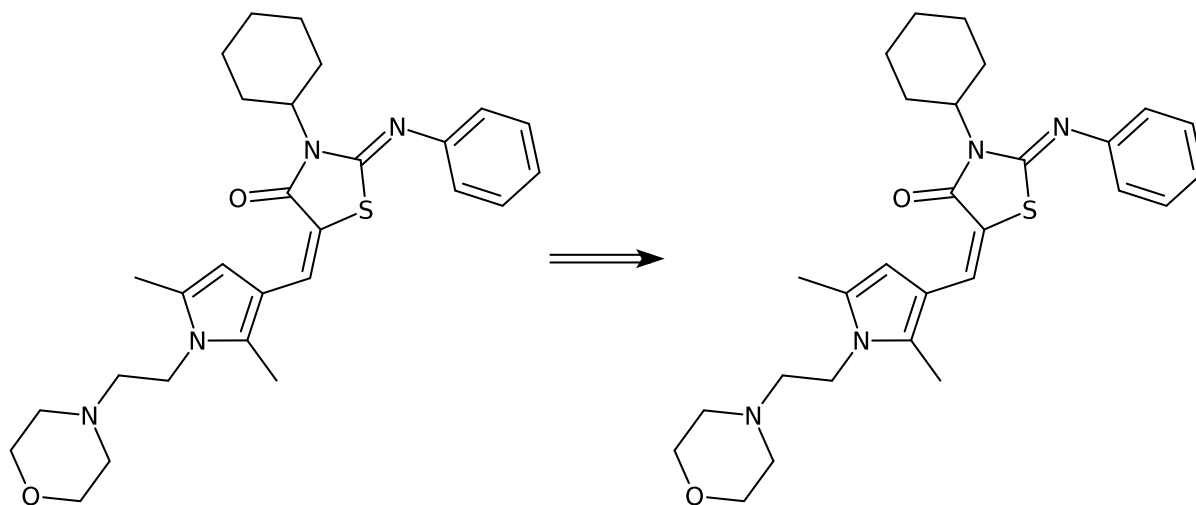





## Information about the retrosynthesis

Created On: 2019-09-26T19:44:14.525000

Model: MolecularTransformer\_v2.0\_R-Inchi-MolecularTransformer\_v2.0\_F

Product: C1C(C)=CC(C)=CC=1NC1N=CC=C(N2C=C(CN3CC(O)CC3)C(C3CC3)=C2)N=1

MSSR: 15

FAP: 0.75

MRP: 20

SbP: 2

Available smiles:

Exclude smiles: C1C(C)=CC(C)=CC=1NC1N=CC=C(N2C=C(CN3CC(O)CC3)C(C3CC3)=C2)N=1

Exclude substructures:

## Sequence 0, Confidence: 0.887

### Step 1

Type: Aldehyde reductive amination, Confidence: 0.983

Cc1cc(C)cc(Nc2nccc(-n3cc(C=O)c(C4CC4)c3)n2)c1.C1CCOC1.OC1CCNC1.[BH3-]C#N.[Na+]>>Cc1cc(C)cc(Nc2nccc(-n3cc(CN4CCC(O)C4)c(C4CC4)c3)n2)c1

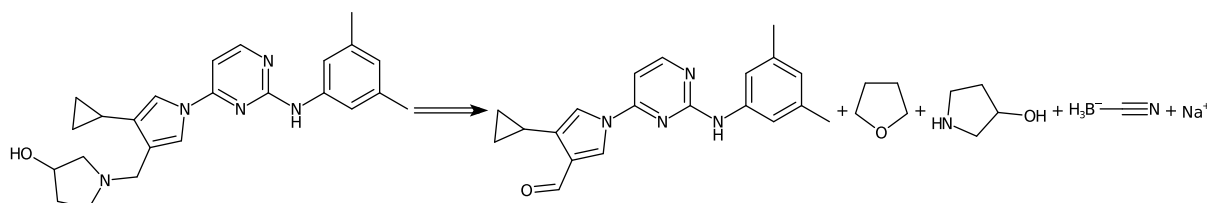

### Step 2

Type: Chloro N-arylation, Confidence: 0.977

Cc1cc(C)cc(Nc2nccc(Cl)n2)c1.O=Cc1c[nH]cc1C1CC1.CN(C)C=O.O=C([O-])[O-].[Cs+].[Cs+]>>Cc1cc(C)cc(Nc2nccc(-n3cc(C=O)c(C4CC4)c3)n2)c1

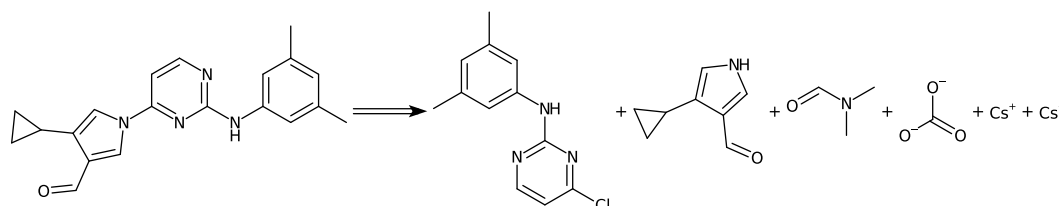

### Step 3

Type: Pyridone to chloropyridine, Confidence: 0.967

Cc1cc(C)cc(Nc2nccc(=O)[nH]2)c1.O=P(Cl)(Cl)Cl>>Cc1cc(C)cc(Nc2nccc(Cl)n2)c1

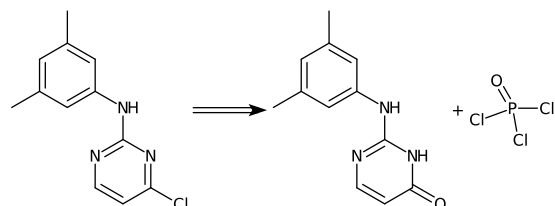

Type: Alcohol to aldehyde oxidation, Confidence: 0.987

OCc1c[nH]cc1C1CC1.CICCl.O=[Mn]=O>>O=Cc1c[nH]cc1C1CC1

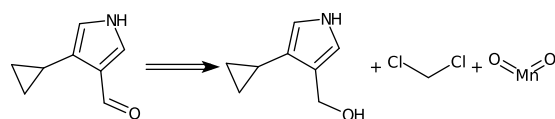

### Step 4

Type: Unrecognized, Confidence: 0.985

CCO.CSc1nccc(=O)[nH]1.Cc1cc(C)cc(N)c1>>Cc1cc(C)cc(Nc2nccc(=O)[nH]2)c1

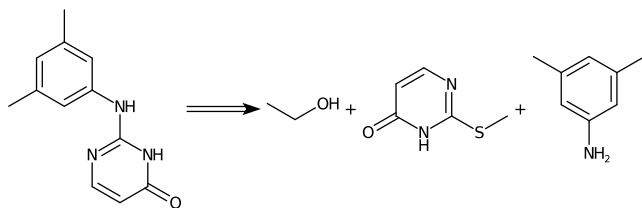

Type: Ester to alcohol reduction, Confidence: 0.983

C1CCOC1.CCOC(=O)c1c[nH]cc1C1CC1.[Al+3].[H-].[H-].[H-].[H-].[Li+].[Al+3].[H-].[H-].[H-].[H-].[Li+]>>OCc1c[nH]cc1C1CC1

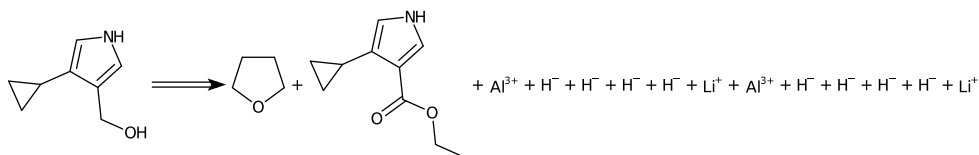



## Information about the retrosynthesis

Created On: 2019-10-01T14:15:14.332000

Model: MolecularTransformer\_v2.0\_R-Inchi-MolecularTransformer\_v2.0\_F

Product: CC1C=C(NC2N=C(N3C=C(C4CC4)C(CN4CC(O)CC4)=C3)C=CN=2)C=C(C)C=1

MSSR: 15

FAP: 0.75

MRP: 20

SbP: 2

Available smiles: C1=CC=CC=C1

Exclude smiles: CC1C=C(NC2N=C(N3C=C(C4CC4)C(CN4CC(O)CC4)=C3)C=CN=2)C=C(C)C=1

Exclude substructures:

## Sequence 0, Confidence: 0.758

Metadata:

Errors: No predictions above FAP. Reduce FAP, increase MRP or inspect siblings.

### Step 1

Type: Aldehyde reductive amination, Confidence: 0.983

Cc1cc(C)cc(Nc2nccc(-n3cc(C=O)c(C4CC4)c3)n2)c1.C1CCOC1.OC1CCNC1.[BH3-]C#N.[Na+]>>Cc1cc(C)cc(Nc2nccc(-n3cc(CN4CCC(O)C4)c(C4CC4)c3)n2)c1

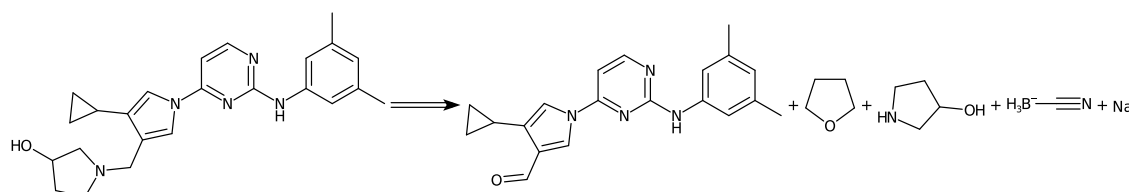

### Step 2

Type: Alcohol to aldehyde oxidation, Confidence: 0.991

Cc1cc(C)cc(Nc2nccc(-n3cc(CO)c(C4CC4)c3)n2)c1.ClCCl.O=[Mn]=O>>Cc1cc(C)cc(Nc2nccc(-n3cc(C=O)c(C4CC4)c3)n2)c1

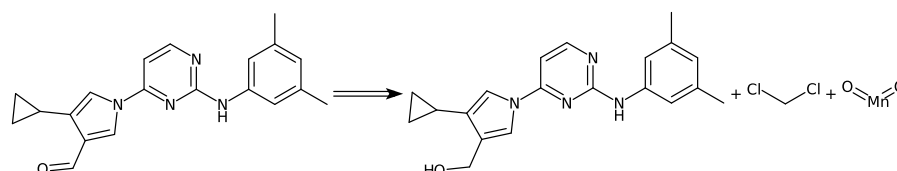

### Step 3

Type: Ester to alcohol reduction, Confidence: 0.991

CCOC(=O)c1cn(-c2ccnc(Nc3cc(C)cc(C)c3)n2)cc1C1CC1.C1CCOC1.[Al+3].[H-].[H-].[H-].[H-].[Li+]>>Cc1cc(C)cc(Nc2nccc(-n3cc(CO)c(C4CC4)c3)n2)c1

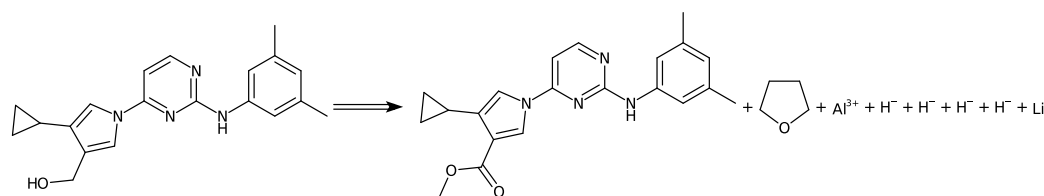

### Step 4

Type: Chloro N-arylation, Confidence: 0.947

CCOC(=O)c1cn(-c2ccnc(Cl)n2)cc1C1CC1.Cc1cc(C)cc(N)c1.Cl>>CCOC(=O)c1cn(-c2ccnc(Nc3cc(C)cc(C)c3)n2)cc1C1CC1

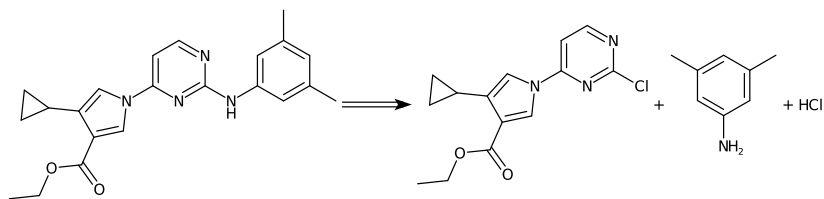

### Step 5

Type: Chloro N-arylation, Confidence: 0.961

CCOC(=O)c1c[nH]cc1C1CC1.CS(C)=O.Clc1ccnc(Cl)n1.O=C([O-])[O-].[K+].[K+]>>CCOC(=O)c1cn(-c2ccnc(Cl)n2)cc1C1CC1

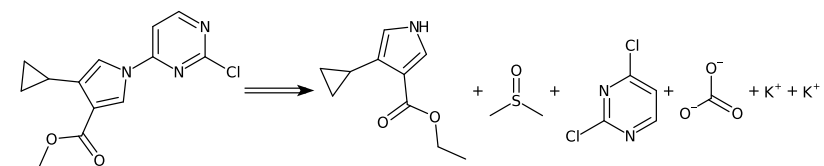

Type: Nitro to amino, Confidence: 0.965

Cc1cc(C)cc([N+](=O)[O-])c1.[HH].[Ni]>>Cc1cc(C)cc(N)c1

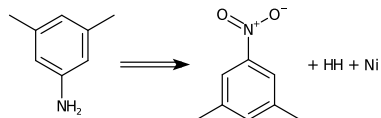

### Step 6

Type: Iodo Suzuki coupling, Confidence: 0.98

CCOC(=O)c1c[nH]cc1I.C1CCC(P(C2CCCCC2)C2CCCCC2)CC1.CC(=O)[O-].CC(=O)[O-].[Pd+2].Cc1ccccc1.O.O=P([O-])([O-])[O-].[K+].[K+].[K+].OB(O)C1CC1>>CCOC(=O)c1c[nH]cc1C1CC1

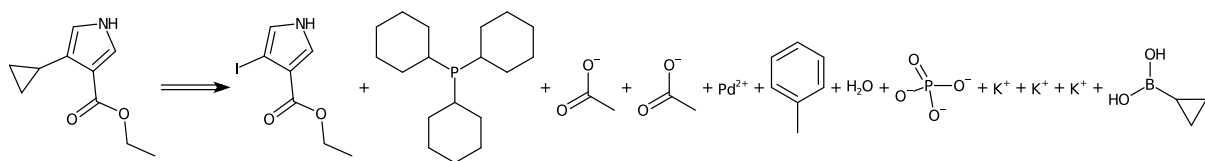

Type: Undefined, Confidence: 0.0

Cc1cc(C)cc([N+](=O)[O-])c1>>Cc1cc(C)cc([N+](=O)[O-])c1

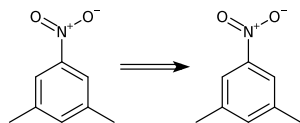

### Step 7

Type: Amino to iodo, Confidence: 0.975

CCOC(=O)c1c[nH]cc1N.Cl.O.O=N[O-].[Na+].[I-].[K+]>>CCOC(=O)c1c[nH]cc1I

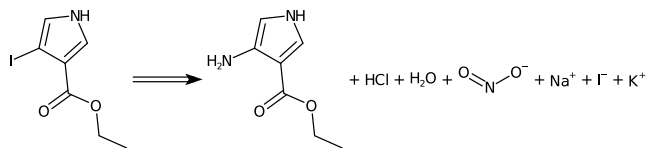

### Step 8

Type: Nitro to amino, Confidence: 0.983

CCOC(=O)c1c[nH]cc1[N+](=O)[O-].CCO.[C].[Pd]>>CCOC(=O)c1c[nH]cc1N

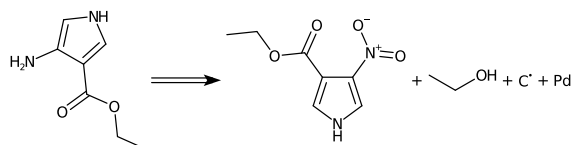

### Step 9

Type: Fischer-Speier esterification, Confidence: 0.987

O=C(O)c1c[nH]cc1[N+](=O)[O-].CCO.O=S(=O)(O)O>>CCOC(=O)c1c[nH]cc1[N+](=O)[O-]

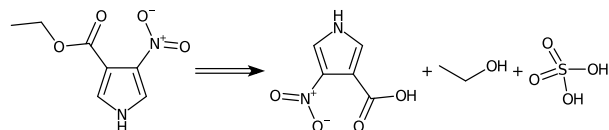

### Step 10

Type: CO2H-Me deprotection, Confidence: 0.963

COC(=O)c1c[nH]cc1[N+](=O)[O-].C1CCOC1.O.[Li+].[OH-]>>O=C(O)c1c[nH]cc1[N+](=O)[O-]

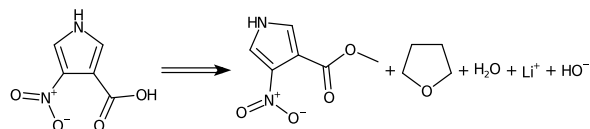

### Step 11

Type: Undefined, Confidence: 0.0

COC(=O)c1c[nH]cc1[N+](=O)[O-]>>COC(=O)c1c[nH]cc1[N+](=O)[O-]

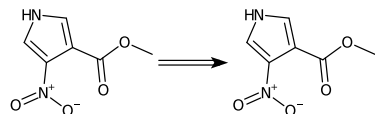



## Information about the retrosynthesis

Created On: 2019-10-01T14:26:41.757000

Model: MolecularTransformer\_v2.0\_R-Inchi-MolecularTransformer\_v2.0\_F

Product: CC1C=C(NC2N=C(N3C=C(C4CC4)C(CN4CC(O)CC4)=C3)C=CN=2)C=C(C)C=1

MSSR: 15

FAP: 0.6

MRP: 50

SbP: 3

Available smiles: C1=CC=CC=C1

Exclude smiles: CC1C=C(NC2N=C(N3C=C(C4CC4)C(CN4CC(O)CC4)=C3)C=CN=2)C=C(C)C=1

Exclude substructures:



## Sequence 0, Confidence: 0.406

Metadata:

Warnings: The retrosynthesis did not complete. Try increasing MSSR.

### Step 1

Type: Aldehyde reductive amination, Confidence: 0.983

Cc1cc(C)cc(Nc2nccc(-n3cc(C=O)c(C4CC4)c3)n2)c1.C1CCOC1.Oc1ccnc1.[BH3-]C#N.[Na+]>>Cc1cc(C)cc(Nc2nccc(-n3cc(CN4CCC(O)C4)c(C4CC4)c3)n2)c1

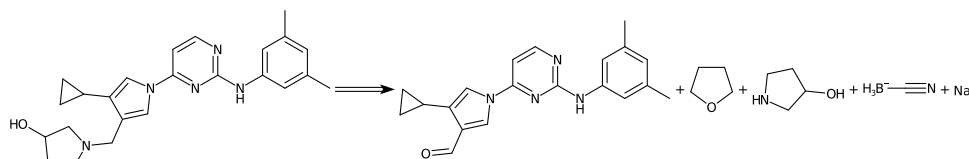

### Step 2

Type: Alcohol to aldehyde oxidation, Confidence: 0.991

Cc1cc(C)cc(Nc2nccc(-n3cc(CO)c(C4CC4)c3)n2)c1.ClCCl.O=[Mn]=O>>Cc1cc(C)cc(Nc2nccc(-n3cc(C=O)c(C4CC4)c3)n2)c1

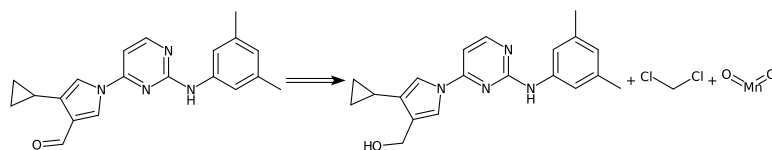

### Step 3

Type: Mesityl N-arylation, Confidence: 0.986

CS(=O)(=O)c1nccc(-n2cc(CO)c(C3CC3)c2)n1.Cc1cc(C)cc(N)c1>>Cc1cc(C)cc(Nc2nccc(-n3cc(CO)c(C4CC4)c3)n2)c1

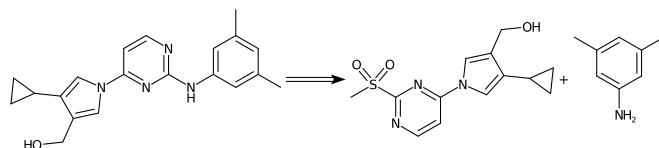

### Step 4

Type: Sulfanyl to sulfonyl, Confidence: 0.908

CSc1nccc(-n2cc(CO)c(C3CC3)c2)n1.CO.O.O=S([O-])OO.[K+]>>CS(=O)(=O)c1nccc(-n2cc(CO)c(C3CC3)c2)n1

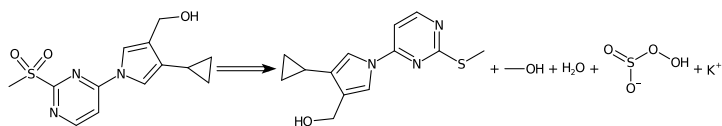

Type: Nitro to amino, Confidence: 0.965

Cc1cc(C)cc([N+](=O)[O-])c1.[HH].[Ni]>>Cc1cc(C)cc(N)c1

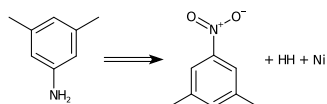

### Step 5

Type: Ester to alcohol reduction, Confidence: 0.985

COC(=O)c1cn(-c2ccnc(SC)n2)cc1C1CC1.C1CCOC1.[Al+3].[H-].[H-].[H-].[H-].[Li+]>>CSc1nccc(-n2cc(CO)c(C3CC3)c2)n1

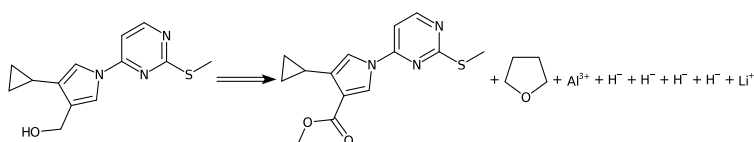

Type: Undefined, Confidence: 0.0

Cc1cc(C)cc([N+](=O)[O-])c1>>Cc1cc(C)cc([N+](=O)[O-])c1

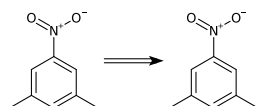

### Step 6

Type: Chloro N-arylation, Confidence: 0.957

COC(=O)c1c[nH]cc1C1CC1.CSc1nccc(Cl)n1.CC#N.O=C([O-])[O-].[Cs+].[Cs+]>>COC(=O)c1cn(-c2ccnc(SC)n2)cc1C1CC1

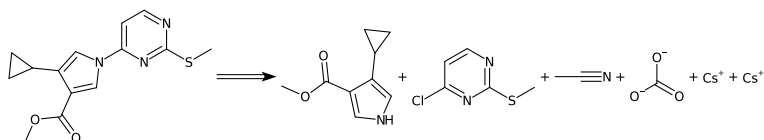

### Step 7

Type: Fischer-Speier esterification, Confidence: 0.991

O=C(O)c1c[nH]cc1C1CC1.CO.O=S(=O)(O)O>>COC(=O)c1c[nH]cc1C1CC1

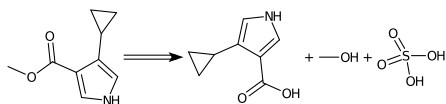

Type: Hydroxy to chloro, Confidence: 0.989

CSc1nccc(=O)[nH]1.O=P(Cl)(Cl)Cl.[Na+].[OH-]>>CSc1nccc(Cl)n1

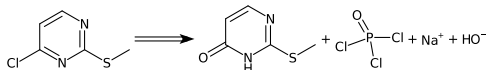

## Step 8

Type: CO<sub>2</sub>H-Et deprotection, Confidence: 0.981

CCOC(=O)c1c[nH]cc1C1CC1.C1CCOC1.O.[Li]O>>O=C(O)c1c[nH]cc1C1CC1

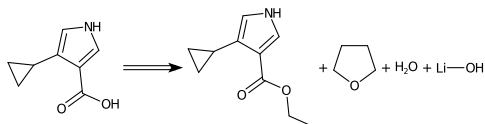

Type: S-methylation, Confidence: 0.977

O=c1cc[nH]c(=S)[nH]1.Cl.CO.O.[Na+].[OH-]>>CSc1nccc(=O)[nH]1

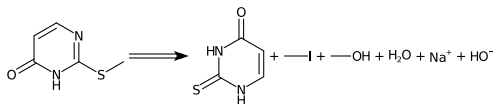

## Step 9

Type: N-Boc deprotection, Confidence: 0.911

CCOC(=O)c1cn(C(=O)OC(C)(C)C)cc1C1CC1.ClCCl.O=C(O)C(F)(F)F>>CCOC(=O)c1c[nH]cc1C1CC1

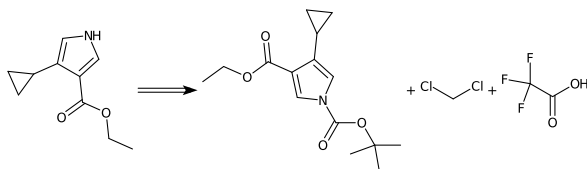

Type: Unrecognized, Confidence: 0.794

CCOC(=O)/C=C/N(C)C.CO.C[O-].[Na+].NC(N)=S>>O=c1cc[nH]c(=S)[nH]1

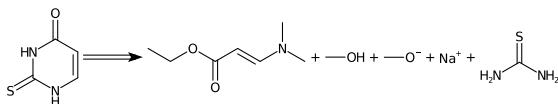

## Step 10

Type: Iodo Suzuki coupling, Confidence: 0.846

CCOC(=O)c1cn(C(=O)OC(C)(C)C)cc1I.C1CCC(P(C2CCCC2)C2CCCC2)CC1.CC(=O)[O-].CC(=O)[O-].[Pd+2].Cc1ccccc1.O.O=P([O-])([O-])[O-].[K+].[K+].[K+].OB(O)C1CC1>>CCOC(=O)c1cn(C(=O)OC(C)(C)C)cc1C1CC1

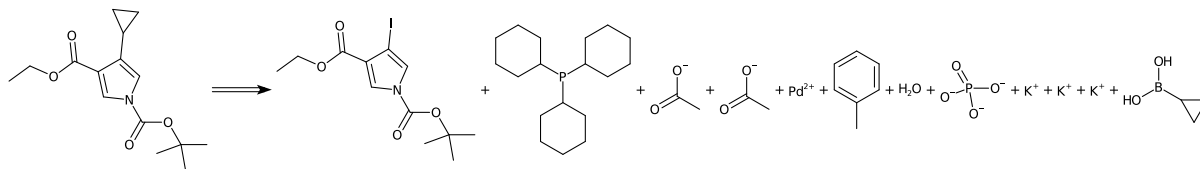

Type: Undefined, Confidence: 0.0

CCOC(=O)/C=C/N(C)C>>CCOC(=O)/C=C/N(C)C

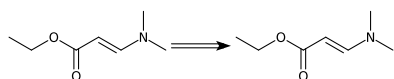

## Step 11

Type: N-Boc protection, Confidence: 0.978

CCOC(=O)c1c[nH]cc1I.C1CCOC1.CC(C)(C)OC(=O)OC(=O)OC(C)(C)C.[H-].[Na+]>>CCOC(=O)c1cn(C(=O)OC(C)(C)C)cc1I

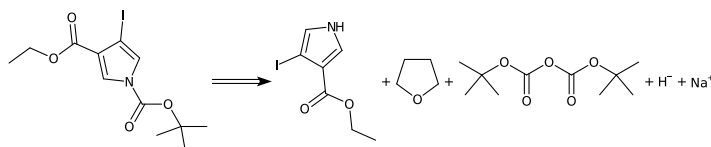

## Step 12

Type: Amino to iodo, Confidence: 0.975

CCOC(=O)c1c[nH]cc1N.Cl.O.O=N[O-].[Na+].[I-].[K+]>>CCOC(=O)c1c[nH]cc1I

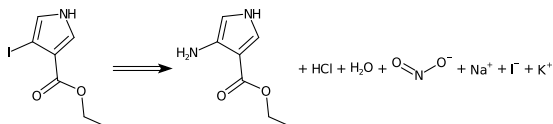

## Step 13

Type: Nitro to amino, Confidence: 0.983

CCOC(=O)c1c[nH]cc1[N+](=O)[O-].CCO.[C].[Pd]>>CCOC(=O)c1c[nH]cc1N

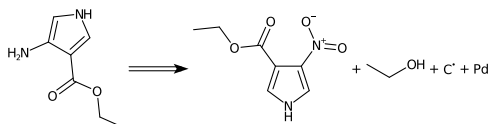

### Step 14

Type: Fischer-Speier esterification, Confidence: 0.987

O=C(O)c1c[nH]cc1[N+](=O)[O-].CCO.O=S(=O)(O)O>>CCOC(=O)c1c[nH]cc1[N+](=O)[O-]

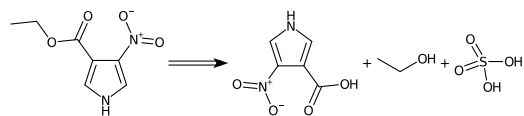

### Step 15

Type: CO<sub>2</sub>H-Me deprotection, Confidence: 0.963

COC(=O)c1c[nH]cc1[N+](=O)[O-].C1CCOC1.O.[Li+].[OH-]>>O=C(O)c1c[nH]cc1[N+](=O)[O-]

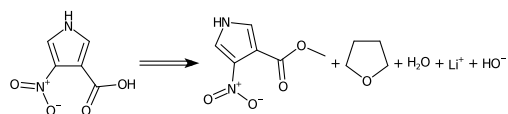



## Information about the retrosynthesis

Created On: 2019-09-26T19:44:27.917000

Model: MolecularTransformer\_v2.0\_R-Inchi-MolecularTransformer\_v2.0\_F

Product:

C1(CC(C)(C)NC(C)(C)C1)N(C)C1C=CC(C2C=CC(C(CNC(C3CC3)=O)O)=CC=2OC)=NN=1

MSSR: 15

FAP: 0.75

MRP: 20

SbP: 2

Available smiles:

Exclude smiles:

C1(CC(C)(C)NC(C)(C)C1)N(C)C1C=CC(C2C=CC(C(CNC(C3CC3)=O)O)=CC=2OC)=NN=1

Exclude substructures:

## Sequence 0, Confidence: 0.87

### Step 1

Type: Chloro Suzuki-type coupling, Confidence: 0.959

CN(c1ccc(Cl)nn1)C1CC(C)(C)NC(C)(C)C1.COc1cc(C(O)CNC(=O)C2CC2)ccc1B1OC(C)(C)C(C)(C)O1>>COc1cc(C(O)CNC(=O)C2CC2)ccc1-c1ccc(N(C)C2CC(C)(C)NC(C)(C)C2)nn1

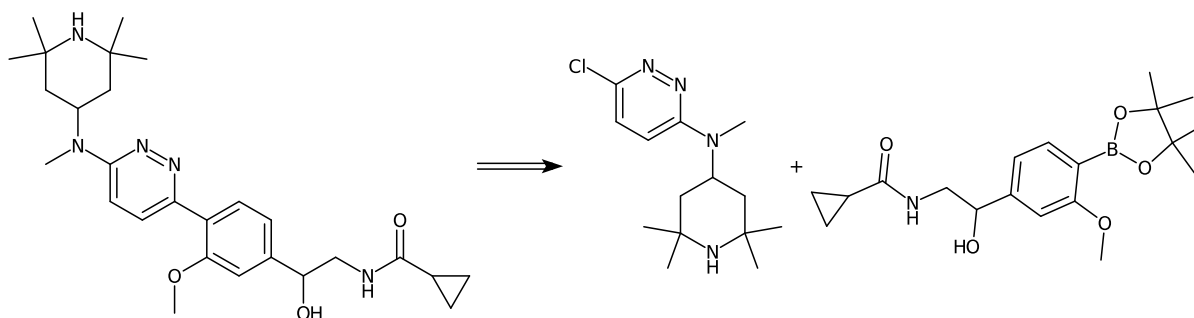

### Step 2

Type: Chloro N-arylation, Confidence: 0.972

CCN(C(C)C)C(C)C.CNC1CC(C)(C)NC(C)(C)C1.Clc1ccc(Cl)nn1>>CN(c1ccc(Cl)nn1)C1CC(C)(C)NC(C)(C)C1

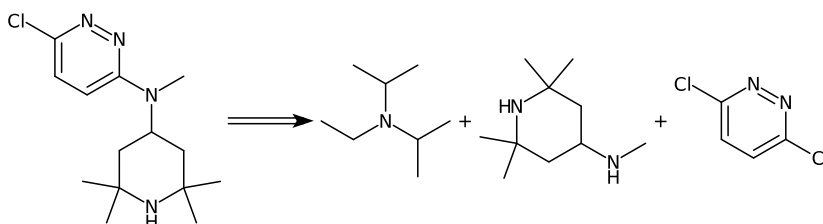

Type: Bromo Miyaura boration, Confidence: 0.967

COc1cc(C(O)CNC(=O)C2CC2)ccc1Br.CC(=O)[O-].[K+].CC1(C)OB(B2OC(C)(C)C(C)(C)O2)OC1(C)C>>COc1cc(C(O)CNC(=O)C2CC2)ccc1B1OC(C)(C)C(C)(C)O1

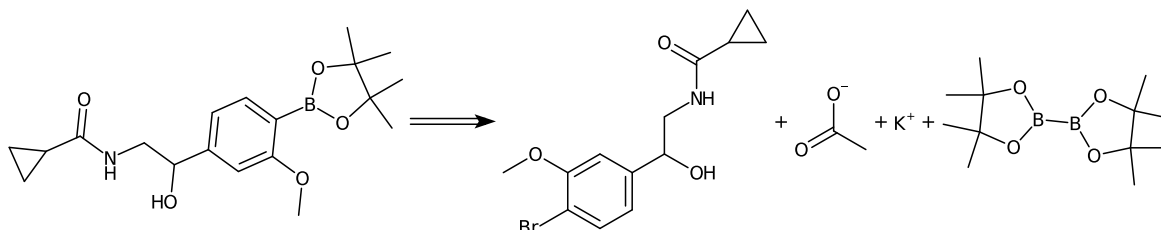

### Step 3

Type: Amide Schotten-Baumann, Confidence: 0.965

C1CCOC1.CCN(C(C)C)C(C)C.COc1cc(C(O)CN)ccc1Br.O=C(Cl)C1CC1>>COc1cc(C(O)CNC(=O)C2CC2)ccc1Br

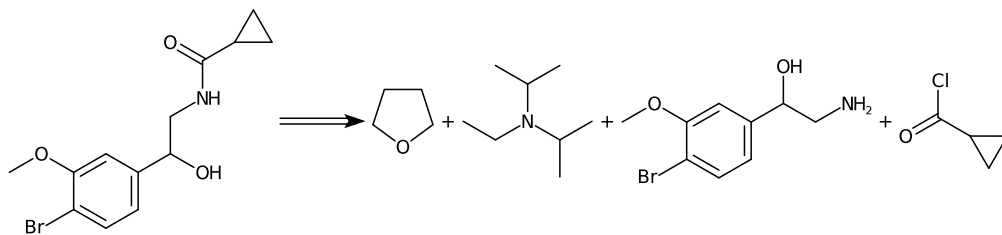





## Information about the retrosynthesis

Created On: 2019-09-30T15:45:28.894000

Model: MolecularTransformer\_v2.0\_R-Inchi-MolecularTransformer\_v2.0\_F

Product: COC1C=CC(CN(C(C)C)C(N2N=C(S(C3CC4CC3CC4)(=O)=O)N=C2)=O)=CC=1

MSSR: 15

FAP: 0.75

MRP: 20

SbP: 2

Available smiles:

Exclude smiles: COC1C=CC(CN(C(C)C)C(N2N=C(S(C3CC4CC3CC4)(=O)=O)N=C2)=O)=CC=1

Exclude substructures:

## Sequence 0, Confidence: 0.81

### Step 1

Type: Amide Schotten-Baumann, Confidence: 0.949

COc1ccc(CN(C(=O)Cl)C(C)C)cc1.O=S(=O)(c1nc[nH]n1)C1CC2CCC1C2.c1ccncc1>>COc1ccc(CN(C(=O)N2cnc(S(=O)(=O)C3CC4CCC3C4)n2)C(C)C)cc1

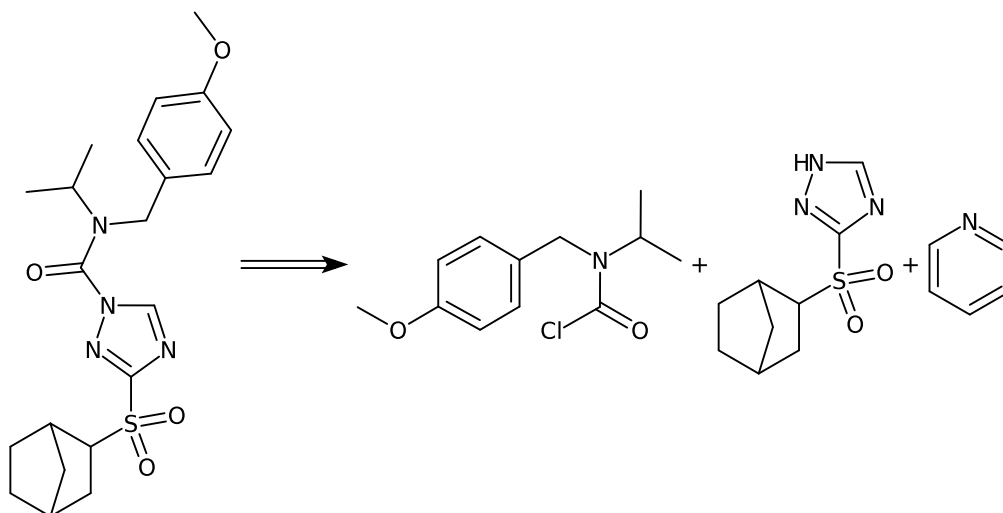

### Step 2

Type: Unrecognized, Confidence: 0.964

C1CCOC1.COc1ccc(CNC(C)C)cc1.O=C(OC(Cl)(Cl)Cl)OC(Cl)(Cl)Cl>>COc1ccc(CN(C(=O)Cl)C(C)C)cc1

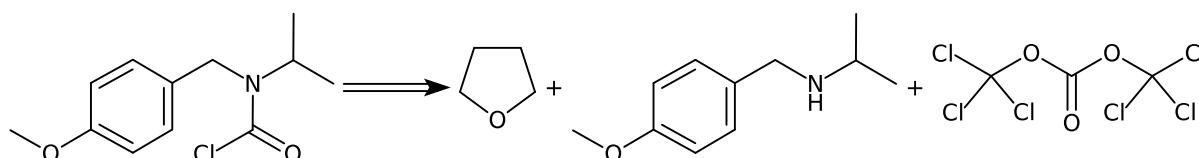

Type: Sulfanyl to sulfonyl, Confidence: 0.954

c1nc(SC2CC3CCC2C3)n[nH]1.CO.O.O=S([O-])OO.[K+]>>O=S(=O)(c1nc[nH]n1)C1CC2CCC1C2

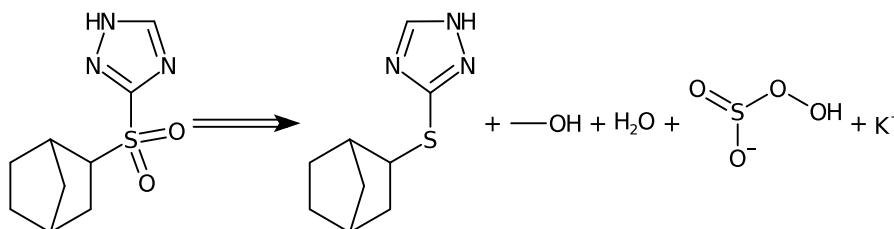

### Step 3

Type: Unrecognized, Confidence: 0.93

Cc1ccc(S(=O)(=O)OC2CC3CCC2C3)cc1.Sc1nc[nH]n1>>c1nc(SC2CC3CCC2C3)n[nH]1

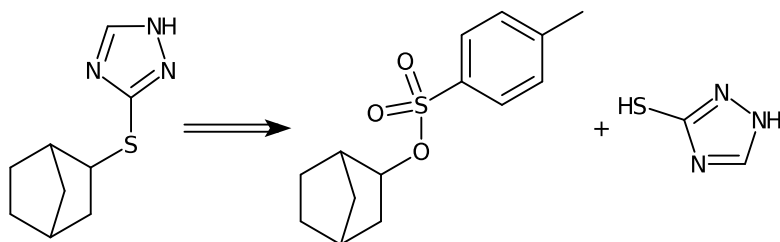

### Step 4

Type: Sulfonic ester Schotten-Baumann, Confidence: 0.998

Cc1ccc(S(=O)(=O)Cl)cc1.OC1CC2CCC1C2>>Cc1ccc(S(=O)(=O)OC2CC3CCC2C3)cc1

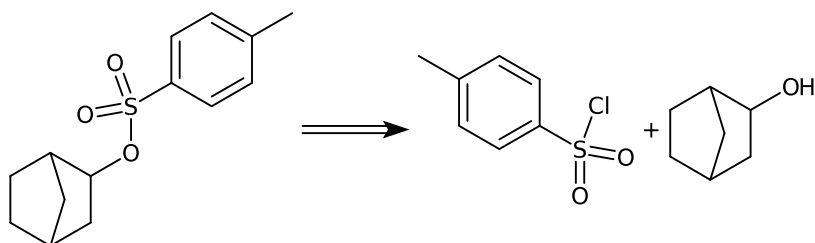



## Information about the retrosynthesis

Created On: 2019-09-26T19:44:51.971000

Model: MolecularTransformer\_v2.0\_R-Inchi-MolecularTransformer\_v2.0\_F

Product:

N1C2=C(CCC2)C(NC2=NNC(C3CCCC3)=C2)=NC=1N1CCCC1C(N1CCN(C(CC)=O)CC1)=O

MSSR: 15

FAP: 0.75

MRP: 20

SbP: 2

Available smiles:

Exclude smiles:

N1C2=C(CCC2)C(NC2=NNC(C3CCCC3)=C2)=NC=1N1CCCC1C(N1CCN(C(CC)=O)CC1)=O

Exclude substructures:

## Sequence 0, Confidence: 0.703

Metadata:

Warnings: 'ERROR MESSAGE'

### Step 1

Type: Alkene hydrogenation, Confidence: 0.902

CCC(=O)N1CCN(C(=O)C2CCCN2c2nc3c(c(Nc4cc(C5=CCCC5)[nH]n4)n2)CCC3)CC1.CCO.[Pd]>>CCC(=O)N1CCN(C(=O)C2CCCN2c2nc3c(c(Nc4cc(C5CCCC5)[nH]n4)n2)CCC3)CC1

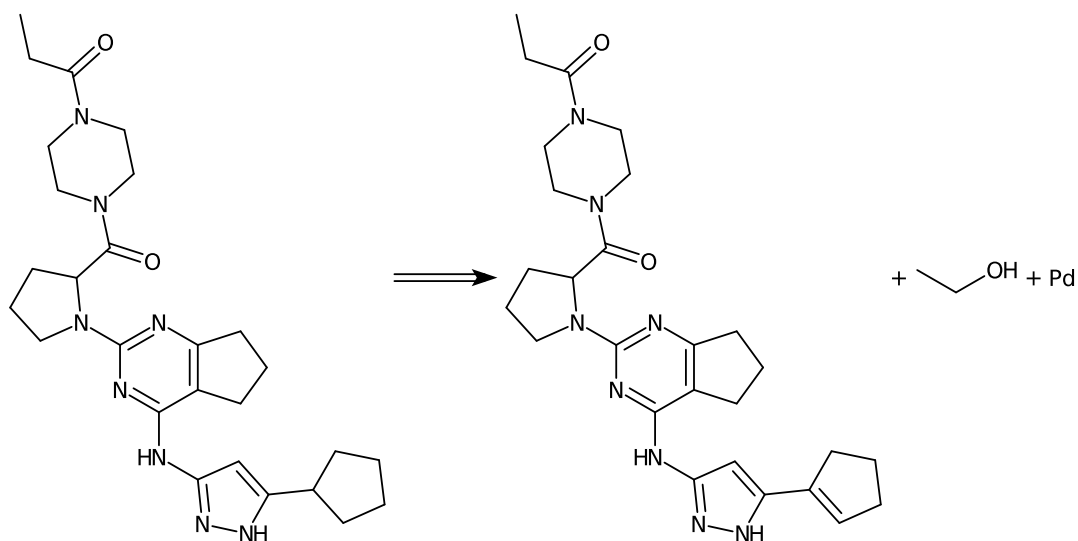

### Step 2

Type: N-SEM deprotection, Confidence: 0.779

CCC(=O)N1CCN(C(=O)C2CCCN2c2nc3c(c(Nc4cc(C5=CCCC5)n(COCC[Si](C)(C)C)n4)n2)CCC3)CC1.CICCl.O=C(O)C(F)(F)F>>CCC(=O)N1CCN(C(=O)C2CCCN2c2nc3c(c(Nc4cc(C5=CCCC5)[nH]n4)n2)CCC3)CC1

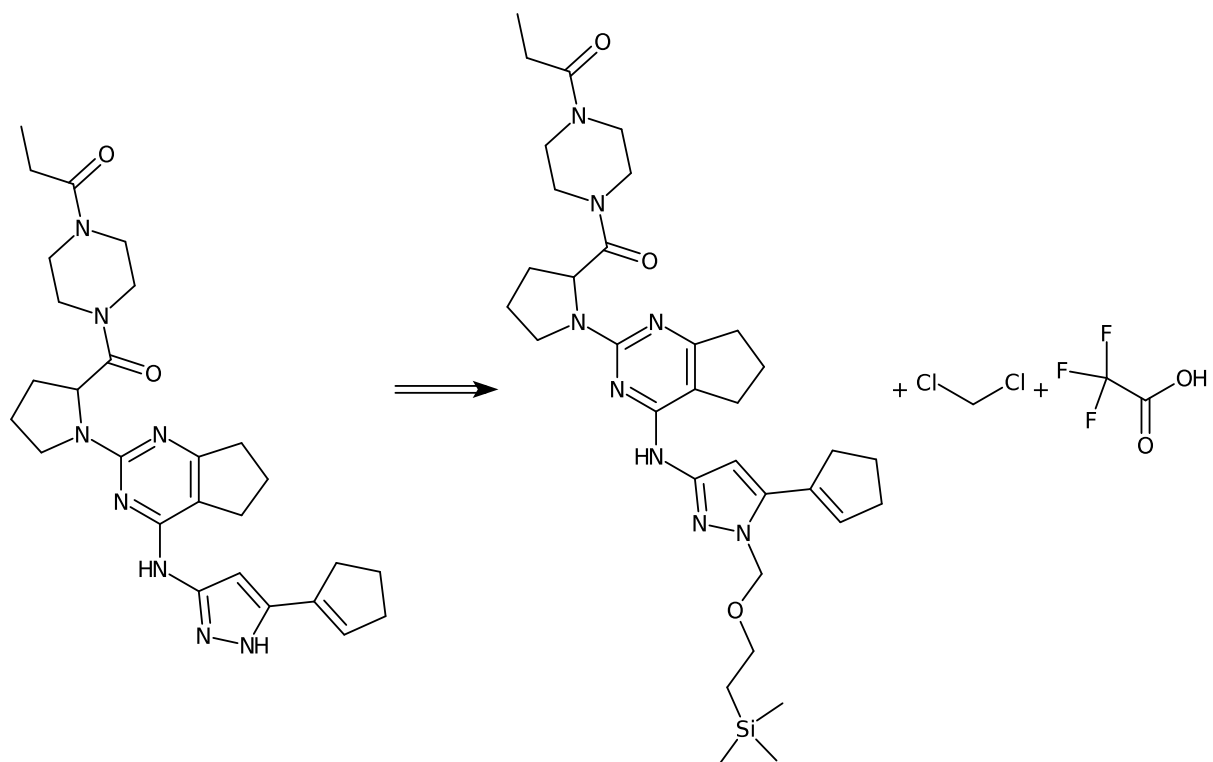

### Step 3

Type: Undefined, Confidence: 0.0

CCC(=O)N1CCN(C(=O)C2CCCN2c2nc3c(c(Nc4cc(C5=CCCC5)n(COCC[Si](C)(C)C)n4)n2)CCC3)CC1>>CCC(=O)N1CCN(C(=O)C2CCCN2c2nc3c(c(Nc4cc(C5=CCCC5)n(COCC[Si](C)(C)C)n4)n2)CCC3)CC1

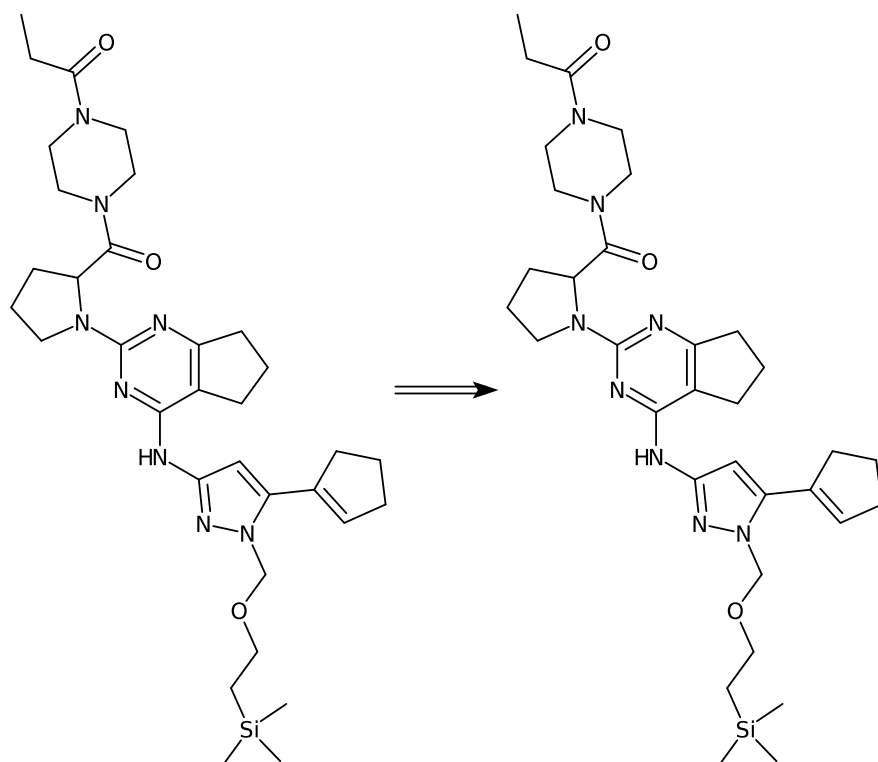

## Sequence 0, Confidence: 0.583

Metadata:

Warnings: The retrosynthesis could not be finished: try increasing the number of steps or start a new one for the missing molecules.

### Step 1

Type: Unrecognized, Confidence: 0.976

FC(F)(F)c1c(-c2cc(Cl)nc(N3CCOCC3)n2)c[nH]c2nccc1-2.C1COCCN1>>FC(F)(F)c1c(-c2cc(N3CCOCC3)nc(N3CCOCC3)n2)c[nH]c2nccc1-2

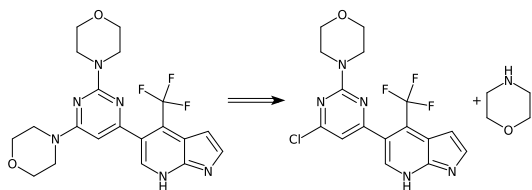

### Step 2

Type: Chloride salt formation, Confidence: 0.96

Oc1cc(-c2c[nH]c3nccc-3c2C(F)(F)F)nc(N2CCOCC2)n1.CC#N.O=P(Cl)(Cl)Cl.[Na+].[OH-]>>FC(F)(F)c1c(-c2cc(Cl)nc(N3CCOCC3)n2)c[nH]c2nccc1-2

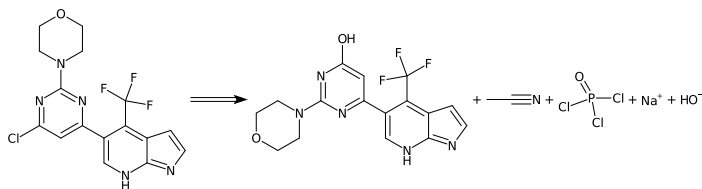

### Step 3

Type: Unrecognized, Confidence: 0.973

Oc1cc(-c2c[nH]c3nccc-3c2C(F)(F)F)nc(Cl)n1.C1COCCN1>>Oc1cc(-c2c[nH]c3nccc-3c2C(F)(F)F)nc(N2CCOCC2)n1

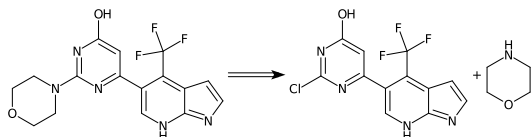

### Step 4

Type: Methoxy to hydroxy, Confidence: 0.958

COc1cc(-c2c[nH]c3nccc-3c2C(F)(F)F)nc(Cl)n1.BrB(Br)Br.ClCCl>>Oc1cc(-c2c[nH]c3nccc-3c2C(F)(F)F)nc(Cl)n1

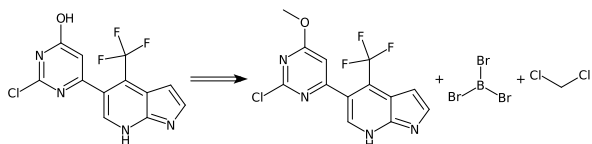

### Step 5

Type: Unrecognized, Confidence: 0.944

COc1cc(-c2cn([Si](C(C)C)(C(C)C)(C(C)C)c3nccc-3c2C(F)(F)F)nc(Cl)n1.C1CCOC1.CCCC[N+](CCC)(CCCC)CCCC.[F-]>>COc1cc(-c2c[nH]c3nccc-3c2C(F)(F)F)nc(Cl)n1

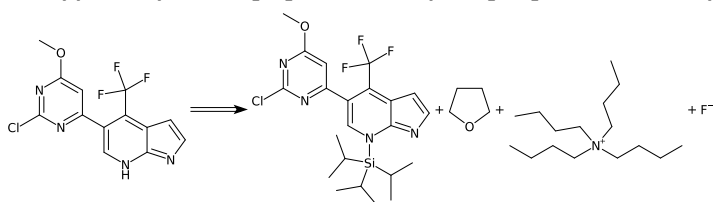

### Step 6

Type: Iodo Suzuki coupling, Confidence: 0.862

CC(C)[Si](C(C)C)(C(C)C)n1cc(I)c(C(F)(F)F)c2ccnc1-2.COc1cc(B2OC(C)(C)C(C)O2)nc(Cl)n1.C1COCCO1.O.O=C([O-])[O-].[Na+].[Na+].[Cl-].[Cl-].[Pd+2].c1ccc(P(c2ccccc2)c2ccccc2)cc1.c1ccc(P(c2ccccc2)c2ccccc2)cc1>>COc1cc(-c2cn([Si](C(C)C)(C(C)C)(C(C)C)c3nccc-3c2C(F)(F)F)nc(Cl)n1

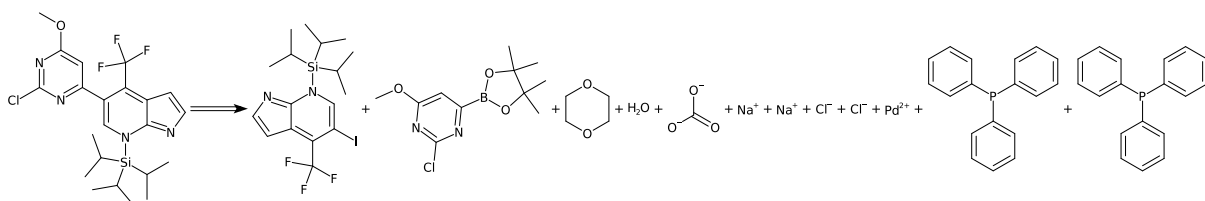

### Step 7

Type: Chloro Miyaura boration, Confidence: 0.82

C1COCCO1.CC(=O)[O-].[K+].CC1(C)OB(B2OC(C)(C)C(C)O2)OC1(C)C.COc1cc(Cl)nc(Cl)n1.CICCl.CC(=O)[O-].[K+]>>COc1cc(B2OC(C)(C)C(C)O2)nc(Cl)n1

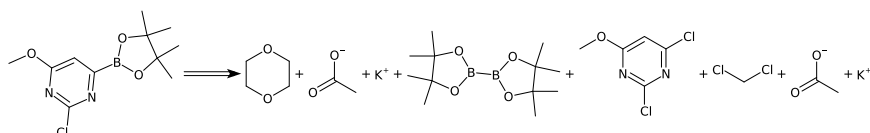



## Sequence 0, Confidence: 0.255

Metadata:

Warnings: The retrosynthesis could not be finished: try increasing the number of steps or start a new one for the missing molecules.

### Step 1

Type: Unrecognized, Confidence: 0.875

CC(=O)OC1CC(CN(Cc2ccccc2)C(=O)CC2CCc3cc(OCc4ccccc4)ccc32)CC1OC(C)=O.CO.[Na+].[OH-]>>O=C(CC1CCc2cc(OCc3ccccc3)ccc21)N(Cc1ccccc1)CC1CC(O)C(O)C1

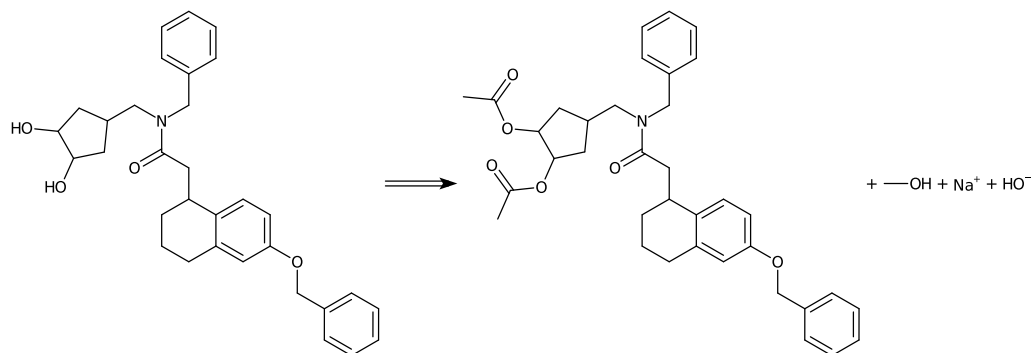

### Step 2

Type: Unrecognized, Confidence: 0.762

CC(=O)OC1CC(CN(Cc2ccccc2)CC1OC(C)=O.O=C(O)CC1CCc2cc(OCc3ccccc3)ccc21)>>CC(=O)OC1CC(CN(Cc2ccccc2)C(=O)CC2CCc3cc(OCc4ccccc4)ccc32)CC1OC(C)=O

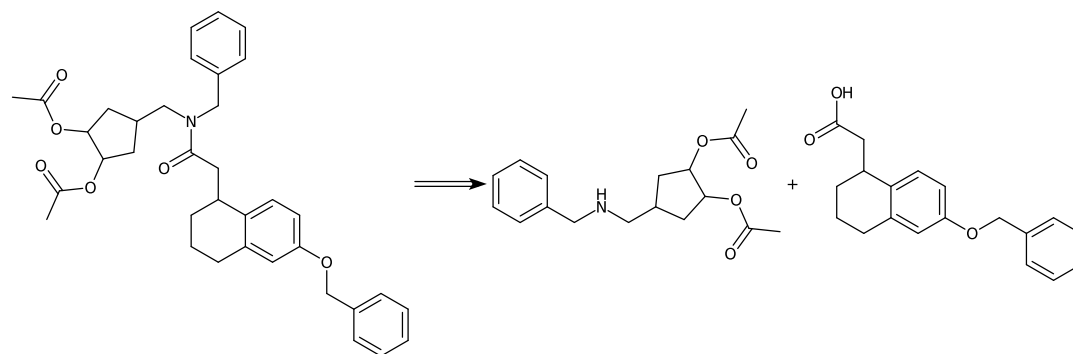

### Step 3

Type: Unrecognized, Confidence: 0.771

CC(=O)OC1CC(C=O)CC1OC(C)=O.CC(=O)O[BH-](OC(C)=O)OC(C)=O.[Na+].CC(=O)O[BH-](OC(C)=O)OC(C)=O.[Na+].ClCCl.NCc1ccccc1>>CC(=O)OC1CC(CN(Cc2ccccc2)CC1OC(C)=O

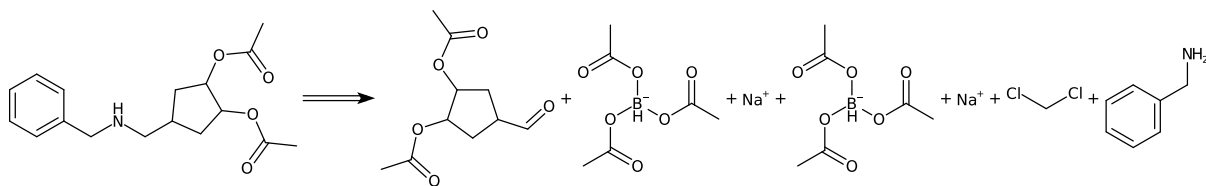

Type: Unrecognized, Confidence: 0.948

N#CCC1CCc2cc(OCc3ccccc3)ccc21.CCO.[Na+].[OH-]>>O=C(O)CC1CCc2cc(OCc3ccccc3)ccc21

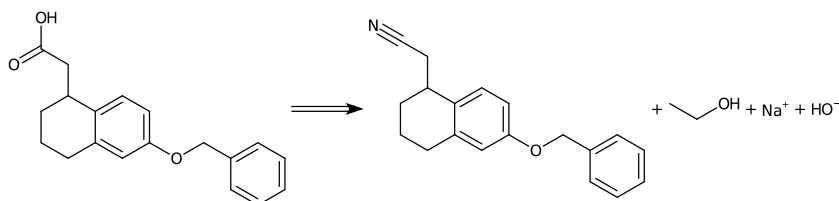

#### Step 4

Type: Separation, Confidence: 0.917

CC(=O)OC1CC(CO)CC1OC(C)=O.ClCCl.Cl.[Cr+].[O-].[O].[O].c1ccncc1>>CC(=O)OC1CC(C=O)CC1OC(C)=O

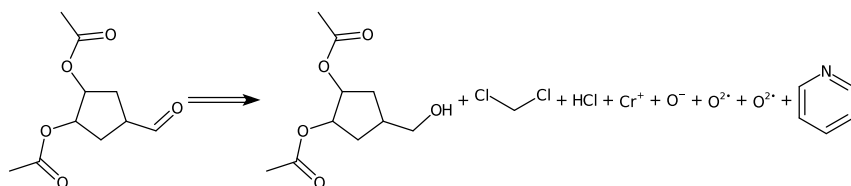

Type: Williamson ether synthesis, Confidence: 0.978

N#CCC1CCc2cc(O)ccc21.BrCc1ccccc1.CC(C)=O.O=C([O-])[O-].[K+].[K+]>>N#CCC1CCc2cc(OCc3ccccc3)ccc21

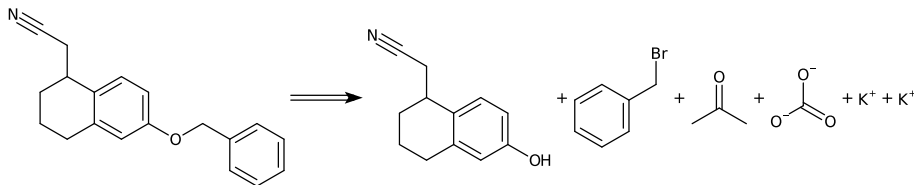

#### Step 5

Type: Unrecognized, Confidence: 0.894

CC(=O)OC1CC(C(=O)O)CC1OC(C)=O.B.C1CCOC1.C1CCOC1>>CC(=O)OC1CC(CO)CC1OC(C)=O

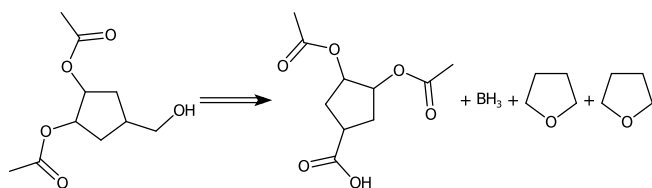

Type: Methoxy to hydroxy, Confidence: 0.98

COc1ccc2c(c1)CCCC2CC#N.BrB(Br)Br.ClCCl.O>>N#CCC1CCCc2cc(O)ccc21

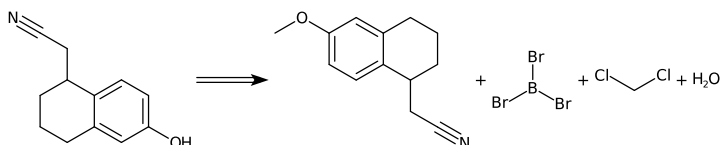

### Step 6

Type: O-Ac protection, Confidence: 0.88

O=C(O)C1CC(O)C(O)C1.CC(=O)OC(C)=O.O=S(=O)(O)O>>CC(=O)OC1CC(C(=O)O)CC1OC(C)=O

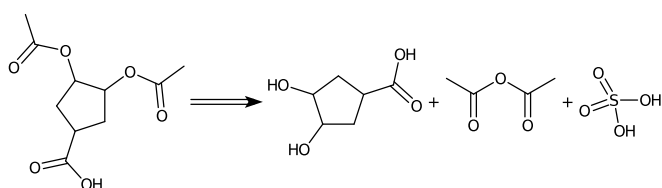

Type: Chloro Kolbe nitrile synthesis, Confidence: 0.977

COc1ccc2c(c1)CCCC2CCl.CN(C)C=O.[C-]#N.[K+]>>COc1ccc2c(c1)CCCC2CC#N

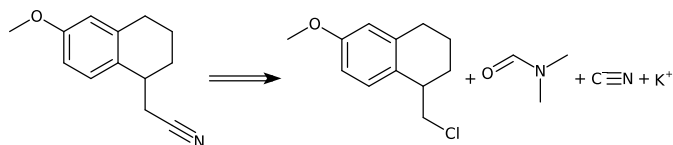

### Step 7

Type: Unrecognized, Confidence: 0.952

O=C1OC2CC1CC2O.O.[Na+].[OH-]>>O=C(O)C1CC(O)C(O)C1

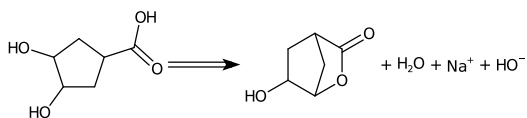

Type: Hydroxy to chloro, Confidence: 0.986

COc1ccc2c(c1)CCCC2CO.O=S(Cl)Cl>>COc1ccc2c(c1)CCCC2Cl

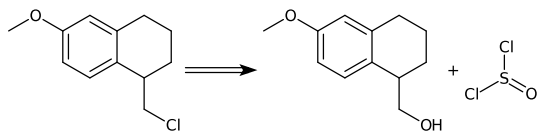

### Step 8

Type: O-Bn deprotection, Confidence: 0.837

O=C1OC2CC1CC2OCc1ccccc1.CO.[HH].[Pd]>>O=C1OC2CC1CC2O

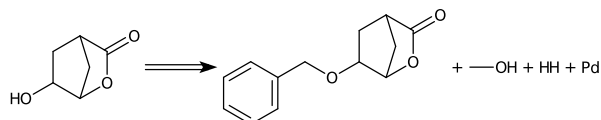

Type: Methoxy to hydroxy, Confidence: 0.986

B.C1CCOC1.COc1ccc2c(c1)CCCC2C(=O)O>>COc1ccc2c(c1)CCCC2CO

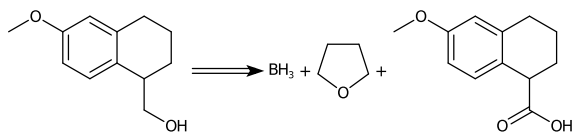

## Sequence 0, Confidence: 0.609

Metadata:

Warnings: The retrosynthesis could not be finished: try increasing the number of steps or start a new one for the missing molecules.

### Step 1

Type: Unrecognized, Confidence: 0.798

CC(=O)C[C@@H](c1ccccc1)c1c(OCc2ccccc2)c2ccccc2oc1=O.CCOC(C)=O.[Pd]>>CC(=O)C[C@@H](c1ccccc1)c1c(O)c2ccccc2oc1=O

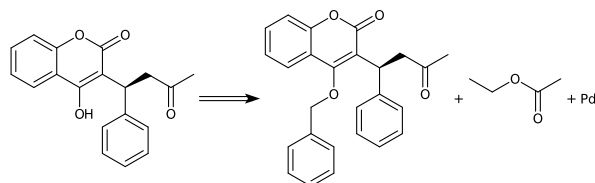

### Step 2

Type: Unrecognized, Confidence: 0.962

CON(C)C(=O)C[C@@H](c1ccccc1)c1c(OCc2ccccc2)c2ccccc2oc1=O.[CH3].[Cl-].[Mg+].C1CCOC1.[CH3].[Cl-].[Mg+]>>CC(=O)C[C@@H](c1ccccc1)c1c(OCc2ccccc2)c2ccccc2oc1=O

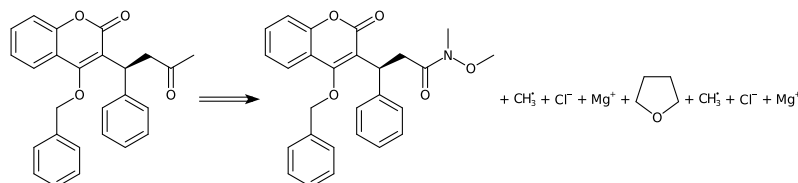

### Step 3

Type: Unrecognized, Confidence: 0.921

O=C(O)C[C@@H](c1ccccc1)c1c(OCc2ccccc2)c2ccccc2oc1=O.CCN(CC)CC.CCN=C=NCCCN(C)C.Cl.CNOC.Cl.ClCCl.On1nnc2ccccc21>>CON(C)C(=O)C[C@@H](c1ccccc1)c1c(OCc2ccccc2)c2ccccc2oc1=O

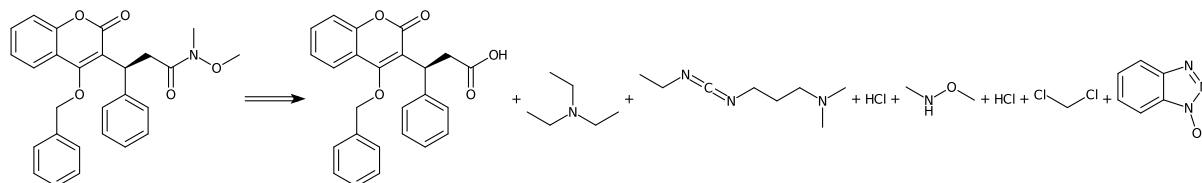

### Step 4

Type: Unrecognized, Confidence: 0.948

CC(C)(C)OC(=O)C[C@@H](c1ccccc1)c1c(OCc2ccccc2)c2ccccc2oc1=O.ClCCl.O=C(O)C(F)(F)F>>O=C(O)C[C@@H](c1ccccc1)c1c(OCc2ccccc2)c2ccccc2oc1=O

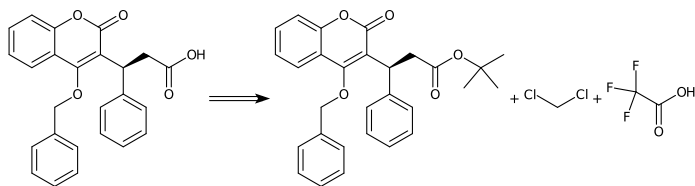

### Step 5

Type: Unrecognized, Confidence: 0.908

CC(C)(C)OC(=O)C[C@@H](c1ccccc1)c1c(O)c2ccccc2oc1=O.BrCc1ccccc1.CC(C)=O.O=C([O-])[O-].[K+].[K+]>>CC(C)(C)OC(=O)C[C@@H](c1ccccc1)c1c(OCc2ccccc2)c2ccccc2oc1=O

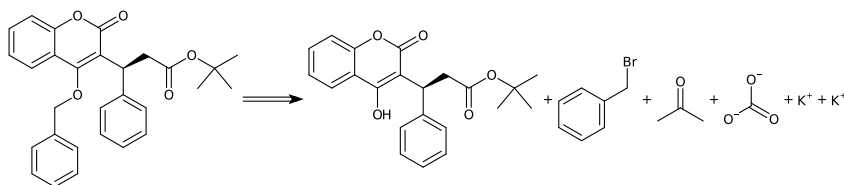

Supplement: SC-011-C9SC05704H-s001.pdf [file SC-011-C9SC05704H-s001.pdf]
